# Supplementary material
Source: PubMed Central journal article supplement (PMC2925322)

## Supporting Information

# **A Program for Ligation at Threonine Sites: Application to the Controlled Total Synthesis of Glycopeptides**

*Jin Chen,<sup>1</sup> Ping Wang,<sup>1</sup> Jianglong Zhu,<sup>1</sup> Qian Wan,<sup>1</sup> and Samuel J. Danishefsky<sup>\*,1,2</sup>*

<sup>1</sup>Laboratory for Bioorganic Chemistry, Sloan-Kettering Institute for Cancer Research, 1275 York Avenue, New York, NY 10065, and <sup>2</sup>Department of Chemistry, Columbia University, Havemeyer Hall, 3000 Broadway, New York, NY 10027

s-danishefsky@ski.mskcc.org

---

### **Content**

|                                                   |     |
|---------------------------------------------------|-----|
| LC-MS and MS characterization of peptides 7-46    | S2  |
| LC-MS monitor of reactions in table 1 and table 2 | S42 |
| NMR spectra of compound 2a-6                      | S50 |

---

\* To whom correspondence should be addressed.

Jin Chen is currently at Department of Chemistry, Michigan Technological University, 1400 Townsend Dr., Houghton, MI 49931, USA.

## LC-MS and MS characterization of peptides 7-46

x-axis indicates time, y-axis indicates Diode Array intensity or ES+TIC intensity.

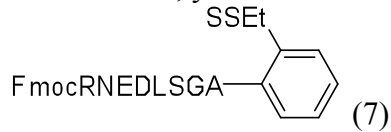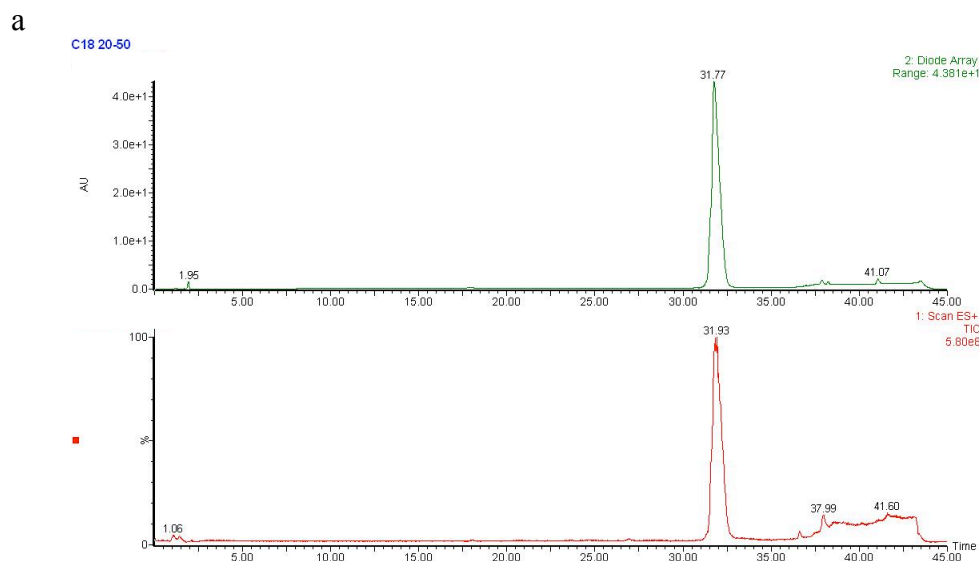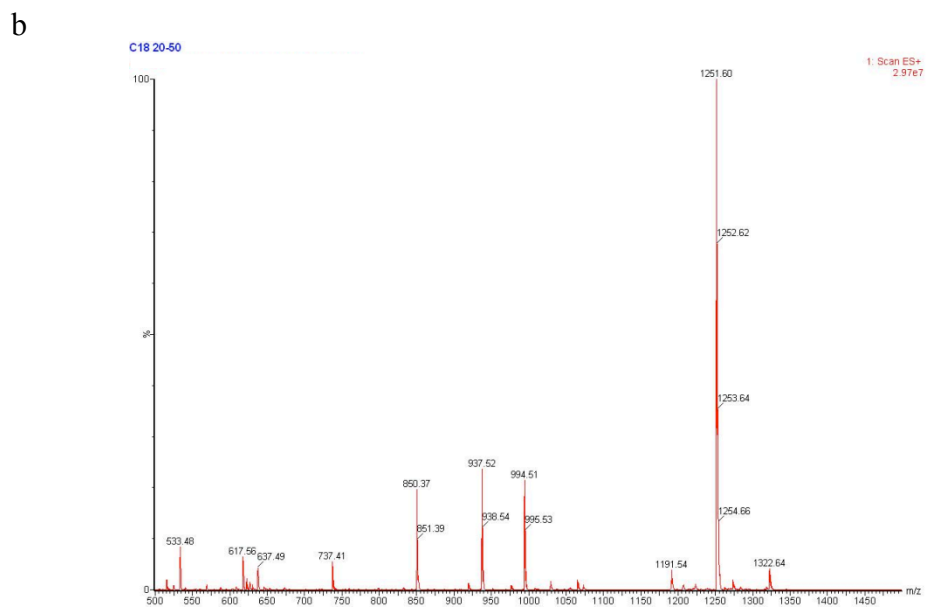

**Figure 1.** (a) UV and MS traces from LC-MS analysis of compound 7: gradient 20-50% CH<sub>3</sub>CN/H<sub>2</sub>O over 30 min at a flow rate of 0.2 mL/min, C18 column. (b) ESI-MS of compound 7. ESI-MS calcd for C<sub>56</sub>H<sub>74</sub>N<sub>12</sub>O<sub>17</sub>S<sub>2</sub> [M+H]<sup>+</sup>  $m/z = 1251.48$ , found: 1251.60.

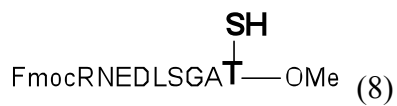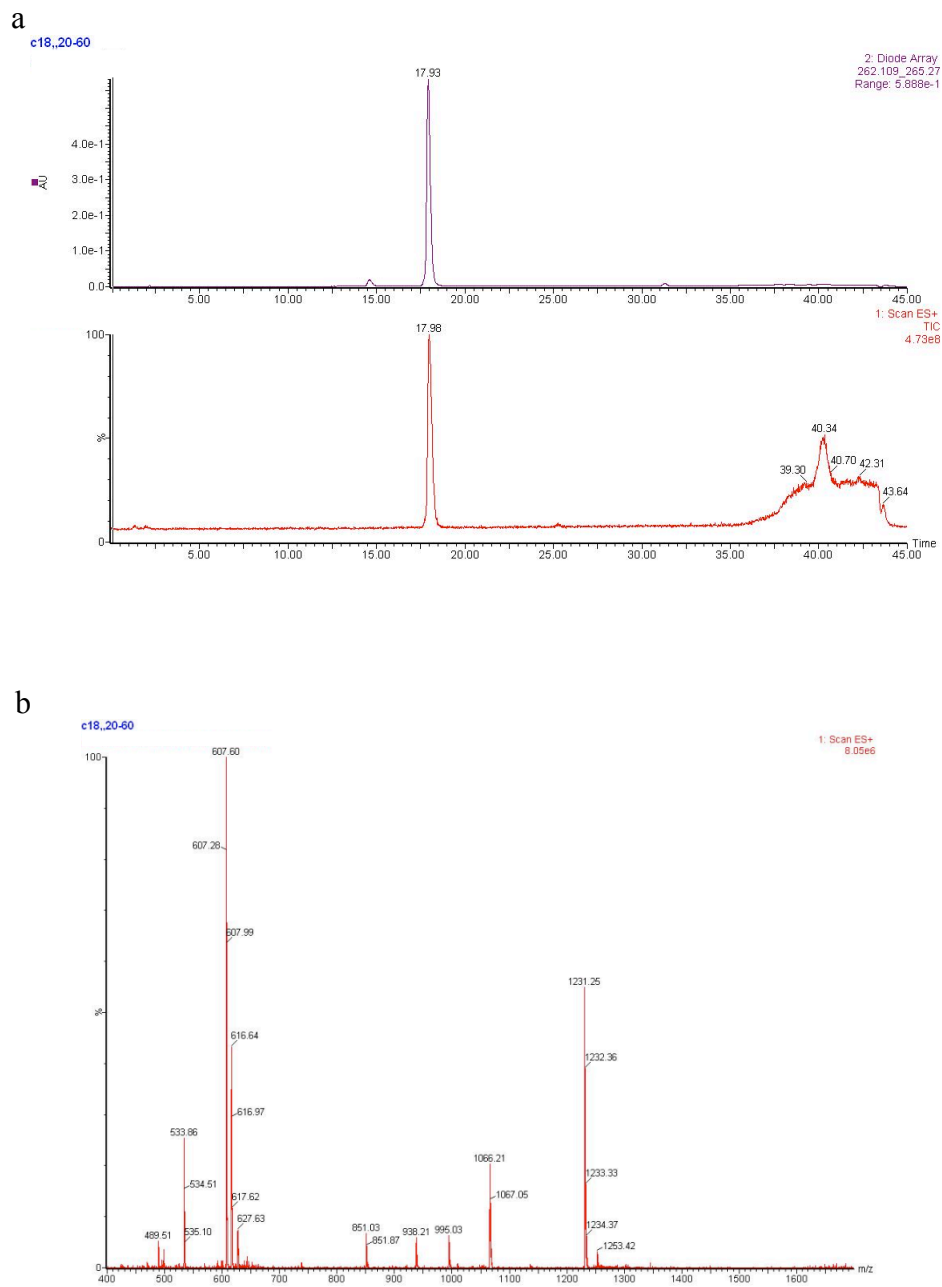

**Figure 2.** (a) UV and MS traces from LC-MS analysis of compound **8**: gradient 20-60% CH<sub>3</sub>CN/H<sub>2</sub>O over 30 min at a flow rate of 0.2 mL/min, C18 column. (b) ESI-MS of compound **8**. ESI-MS calcd for C<sub>53</sub>H<sub>75</sub>N<sub>13</sub>O<sub>19</sub>S [M+H]<sup>+</sup>  $m/z = 1230.51$ , found: 1231.12.

FmocRNEDLSGAT—OMe (9)

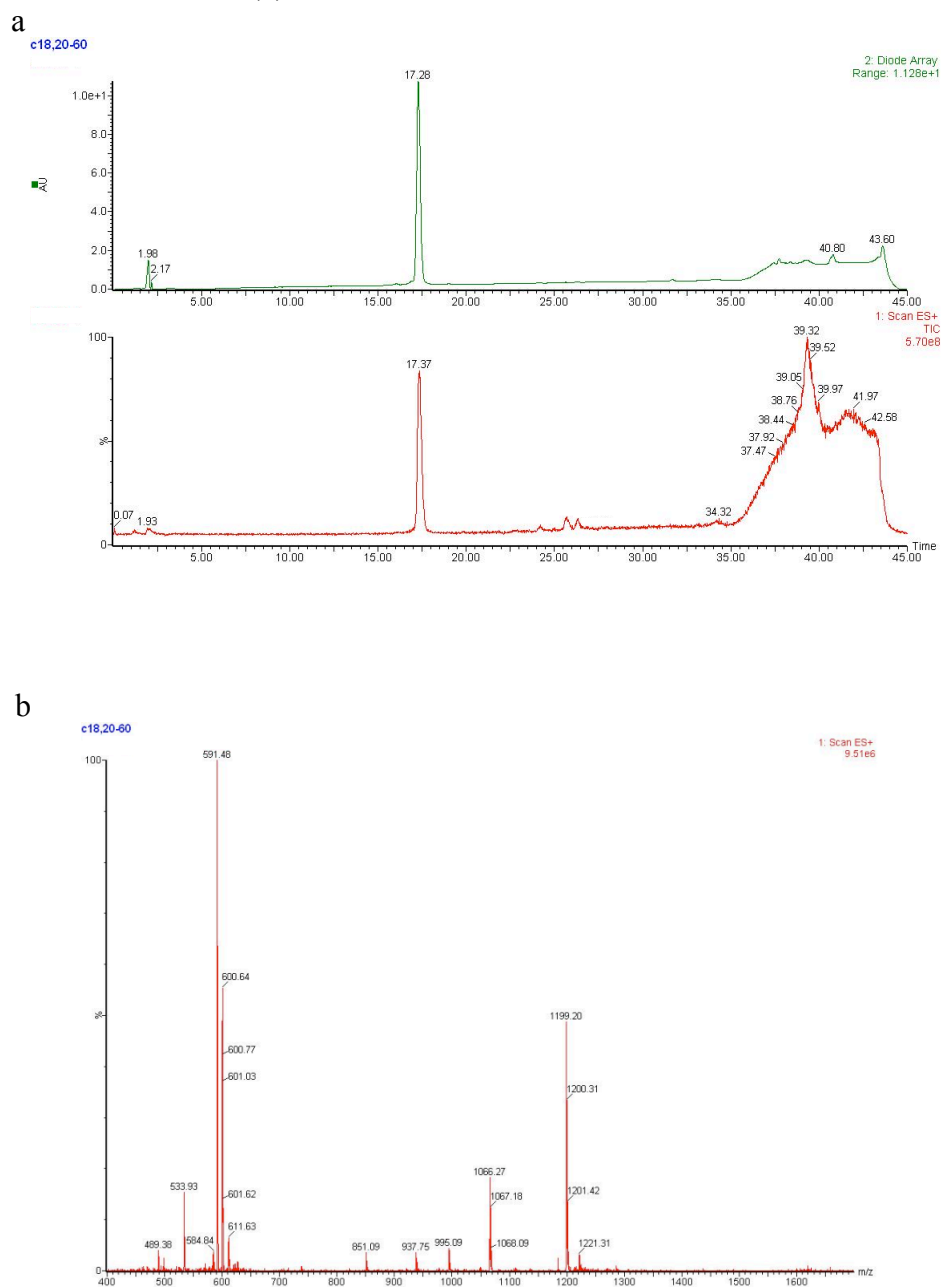

**Figure 3.** (a) UV and MS traces from LC-MS analysis of compound 9: gradient 20-60% CH<sub>3</sub>CN/H<sub>2</sub>O over 30 min at a flow rate of 0.2 mL/min, C18 column. (b) ESI-MS of compound 9. ESI-MS calcd for C<sub>53</sub>H<sub>75</sub>N<sub>13</sub>O<sub>19</sub> [M+H]<sup>+</sup> *m/z* = 1198.54, found: 1198.88.



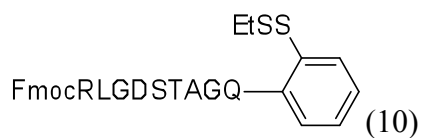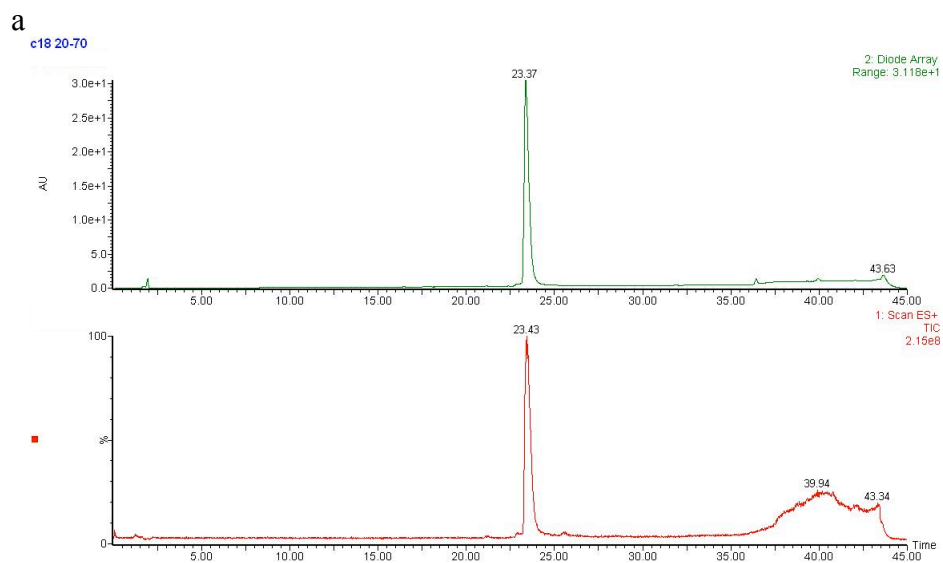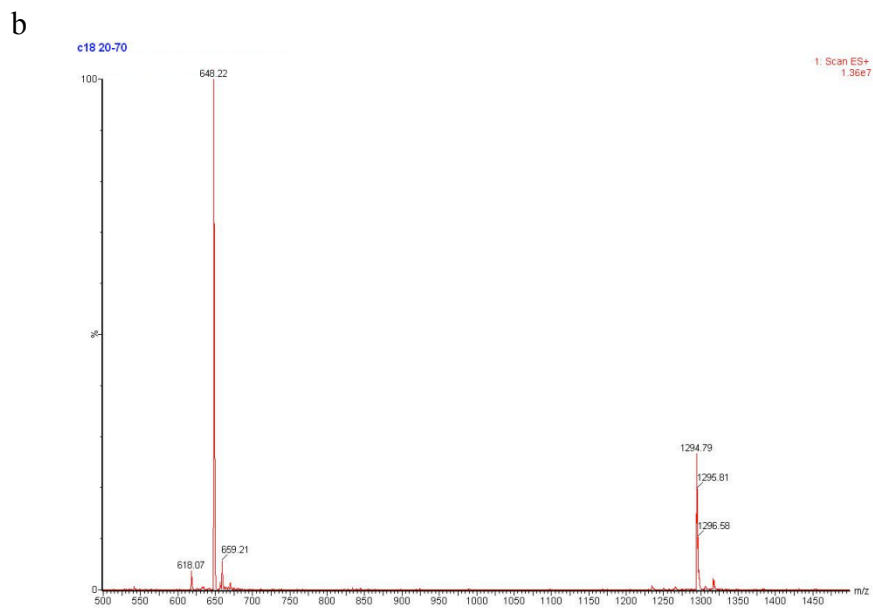

**Figure 4.** (a) UV and MS traces from LC-MS analysis of compound **10**: gradient 20-70% CH<sub>3</sub>CN/H<sub>2</sub>O over 30 min at a flow rate of 0.2 mL/min, C18 column. (b) ESI-MS of compound **10**. ESI-MS calcd for C<sub>58</sub>H<sub>79</sub>N<sub>13</sub>O<sub>17</sub>S<sub>2</sub> [M+H]<sup>+</sup>  $m/z = 1294.53$ , found: 1294.79.

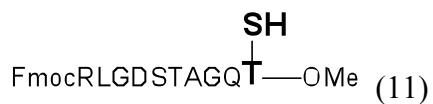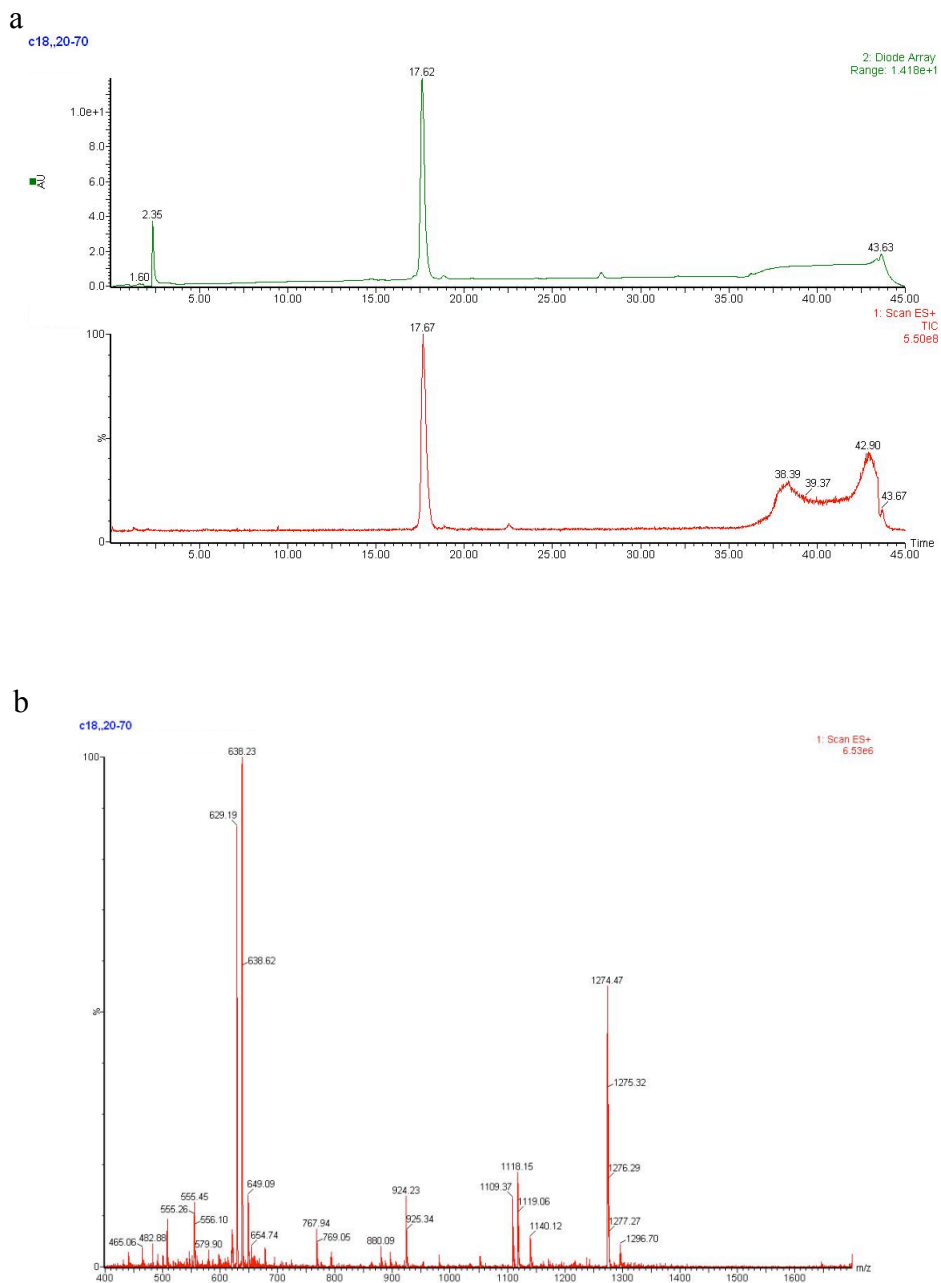

**Figure 5.** (a) UV and MS traces from LC-MS analysis of compound **11**: gradient 20-70% CH<sub>3</sub>CN/H<sub>2</sub>O over 30 min at a flow rate of 0.2 mL/min, C18 column. (b) ESI-MS of compound **11**. ESI-MS calcd for C<sub>55</sub>H<sub>79</sub>N<sub>14</sub>O<sub>19</sub>S [M+H]<sup>+</sup> *m/z* = 1273.55, found: 1274.08.

FmocRLGDSTAGQT—OMe (12)

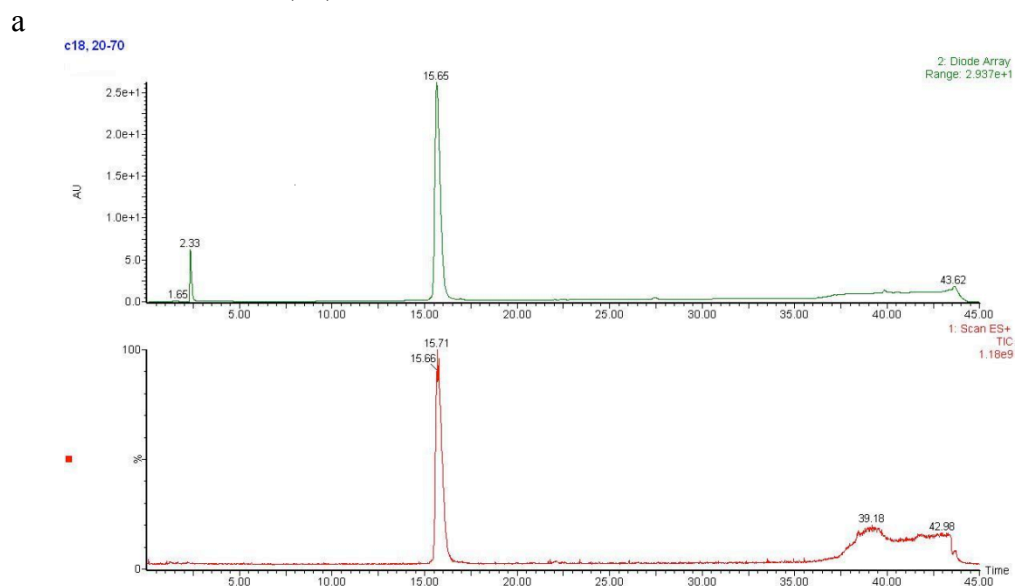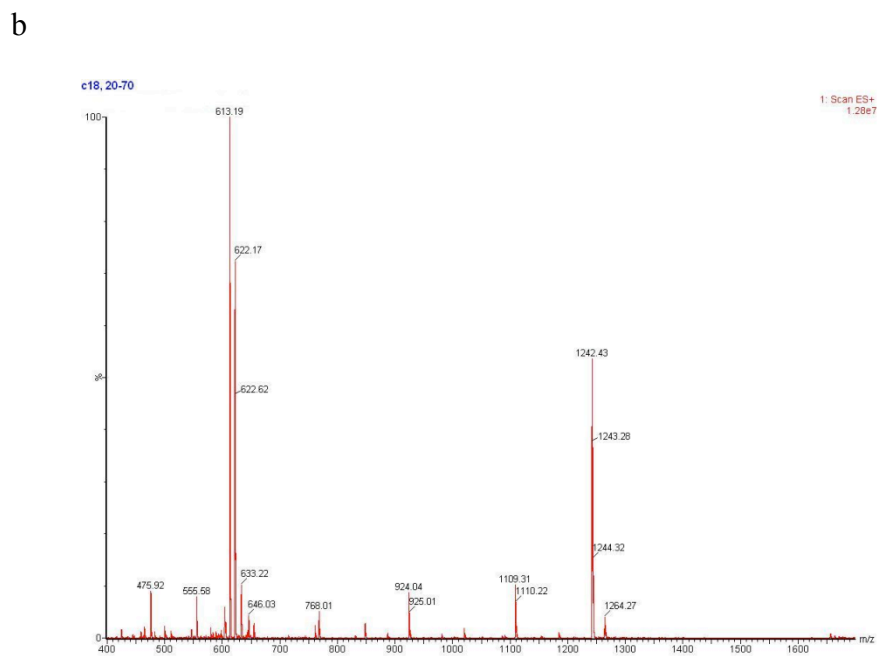

**Figure 6.** (a) UV and MS traces from LC-MS analysis of compound **12**: gradient 30-60% CH<sub>3</sub>CN/H<sub>2</sub>O over 30 min at a flow rate of 0.2 mL/min, C18 column. (b) ESI-MS of compound **12**. ESI-MS calcd for C<sub>55</sub>H<sub>80</sub>N<sub>14</sub>O<sub>19</sub> [M+H]<sup>+</sup>  $m/z$  = 1241.58, found: 1241.91.

FmocRLGDSTAGY—SPh (13)

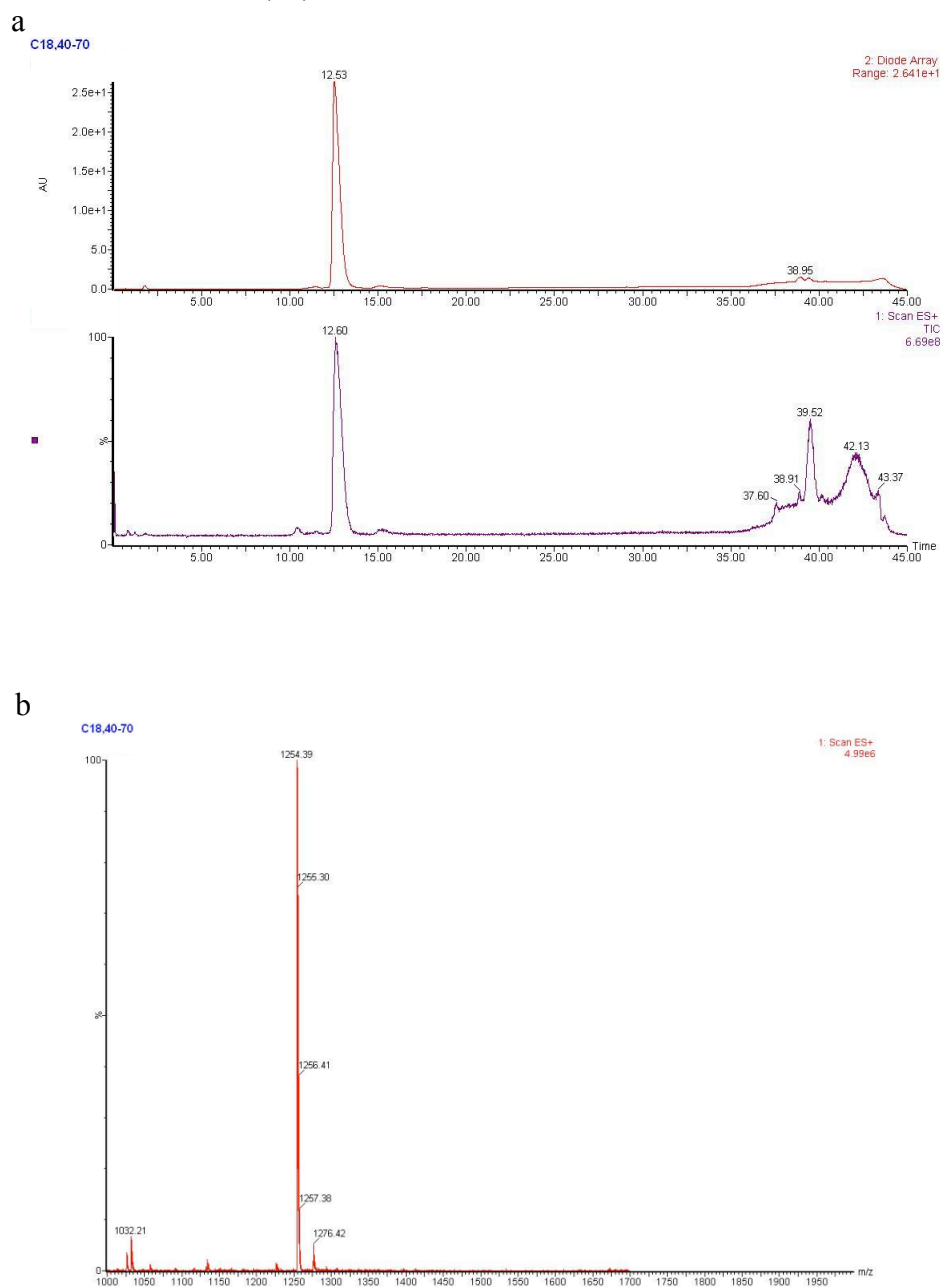

**Figure 7.** (a) UV and MS traces from LC-MS analysis of compound **13**: gradient 40-70% CH<sub>3</sub>CN/H<sub>2</sub>O over 30 min at a flow rate of 0.2 mL/min, C18 column. (b) ESI-MS of compound **13**. ESI-MS calcd for C<sub>60</sub>H<sub>76</sub>N<sub>12</sub>O<sub>16</sub>S [M+H]<sup>+</sup>  $m/z = 1253.53$ , found: 1254.20.

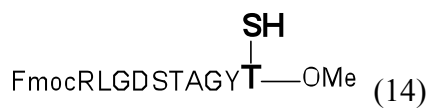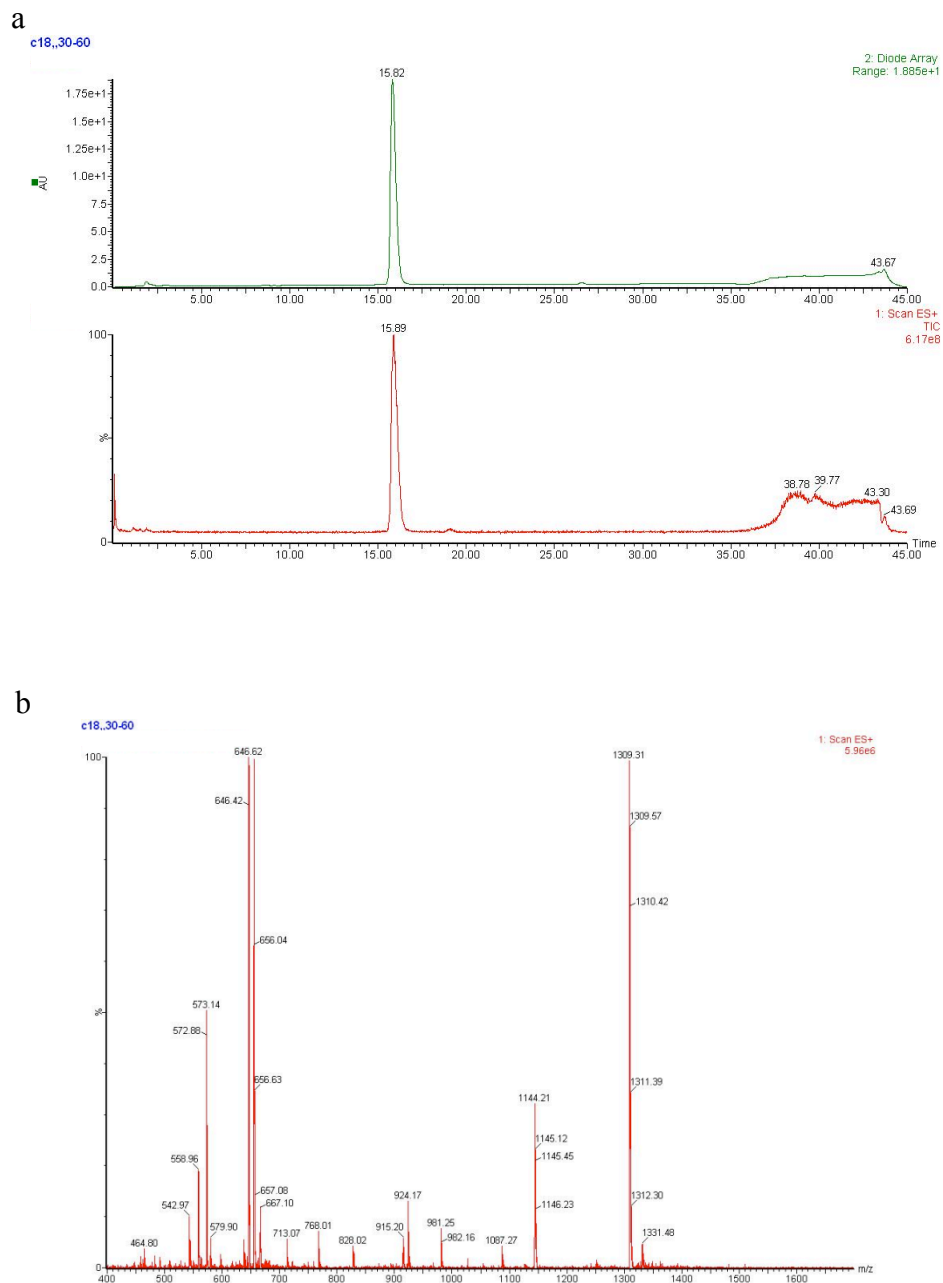

**Figure 8.** (a) UV and MS traces from LC-MS analysis of compound **14**: gradient 30-60% CH<sub>3</sub>CN/H<sub>2</sub>O over 30 min at a flow rate of 0.2 mL/min, C18 column. (b) ESI-MS of compound **14**. ESI-MS calcd for C<sub>59</sub>H<sub>81</sub>N<sub>13</sub>O<sub>19</sub>S [M+H]<sup>+</sup> *m/z* = 1308.56, found: 1308.92.

FmocRLGDSTAGYT—OMe (15)

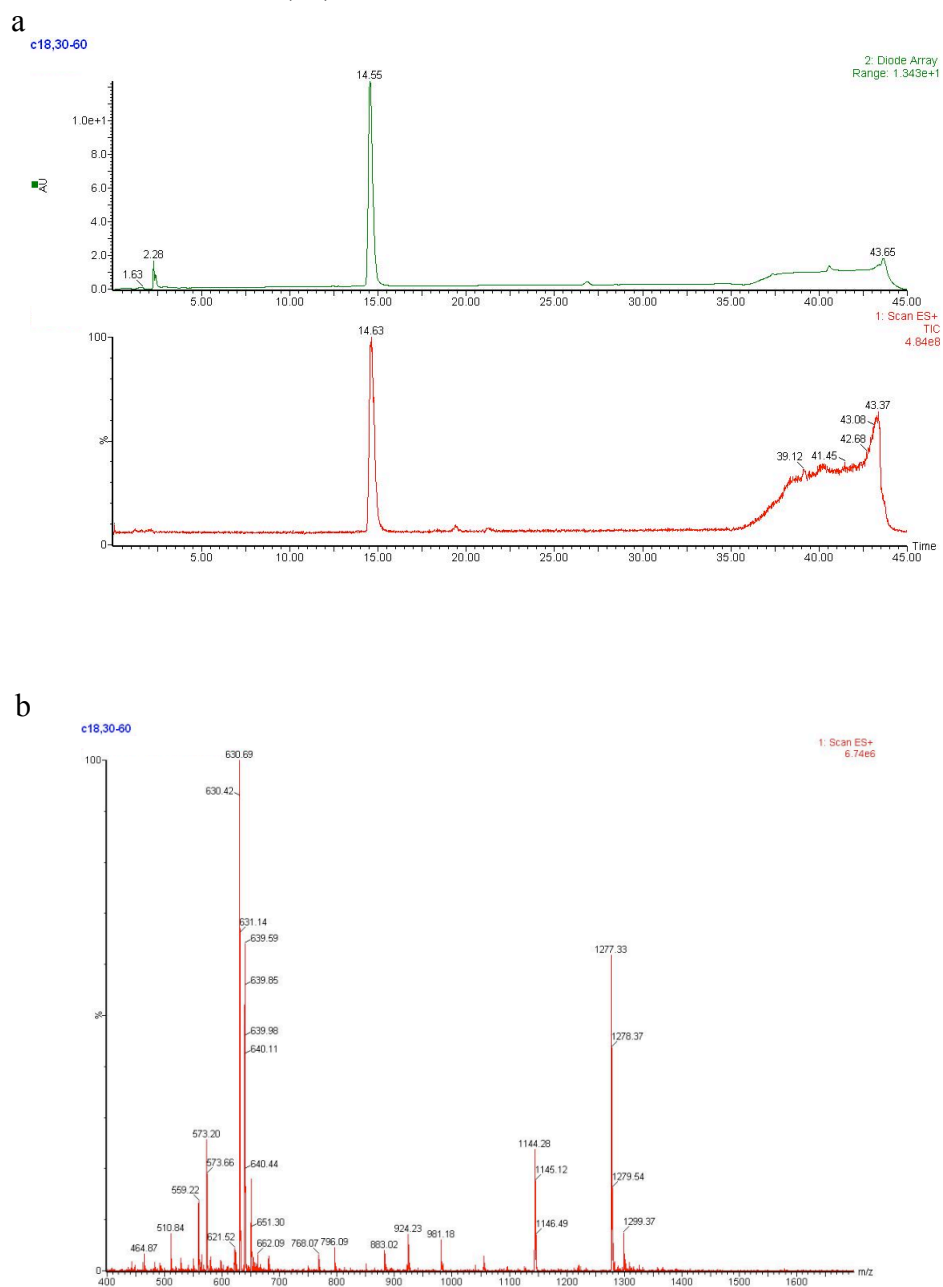

**Figure 9.** (a) UV and MS traces from LC-MS analysis of compound **15**: gradient 30-60% CH<sub>3</sub>CN/H<sub>2</sub>O over 30 min at a flow rate of 0.2 mL/min, C18 column. (b) ESI-MS of compound **15**. ESI-MS calcd for C<sub>59</sub>H<sub>81</sub>N<sub>13</sub>O<sub>19</sub> [M+H]<sup>+</sup> *m/z* = 1276.59, found: 1277.07.

FmocRLGDSTAGW—SPh (16)

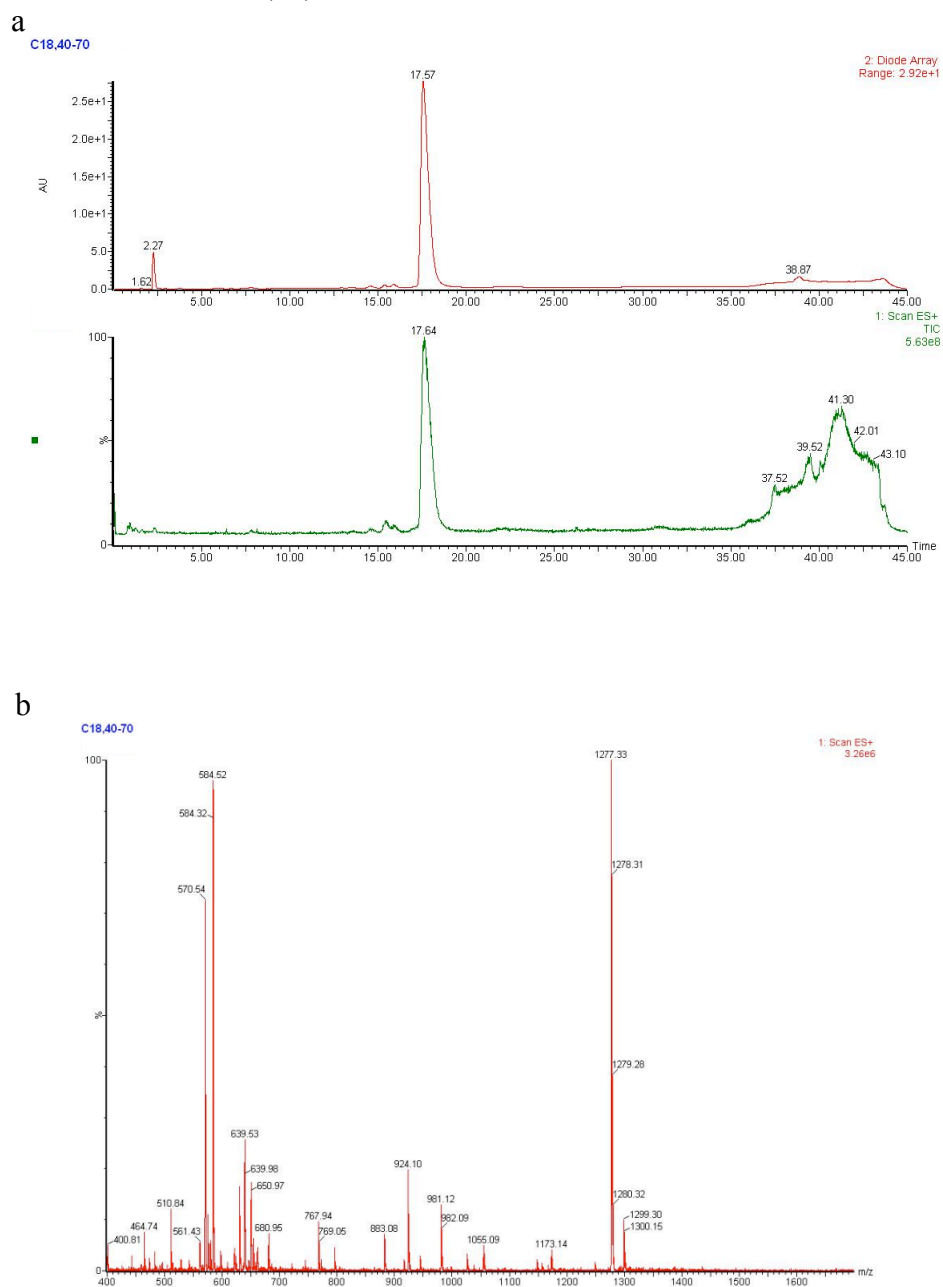

**Figure 10.** (a) UV and MS traces from LC-MS analysis of compound **16**: gradient 40-70% CH<sub>3</sub>CN/H<sub>2</sub>O over 30 min at a flow rate of 0.2 mL/min, C18 column. (b) ESI-MS of compound **16**. ESI-MS calcd for C<sub>62</sub>H<sub>77</sub>N<sub>13</sub>O<sub>15</sub>S [M+H]<sup>+</sup>  $m/z = 1276.55$ , found: 1276.81.

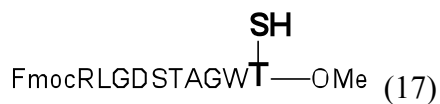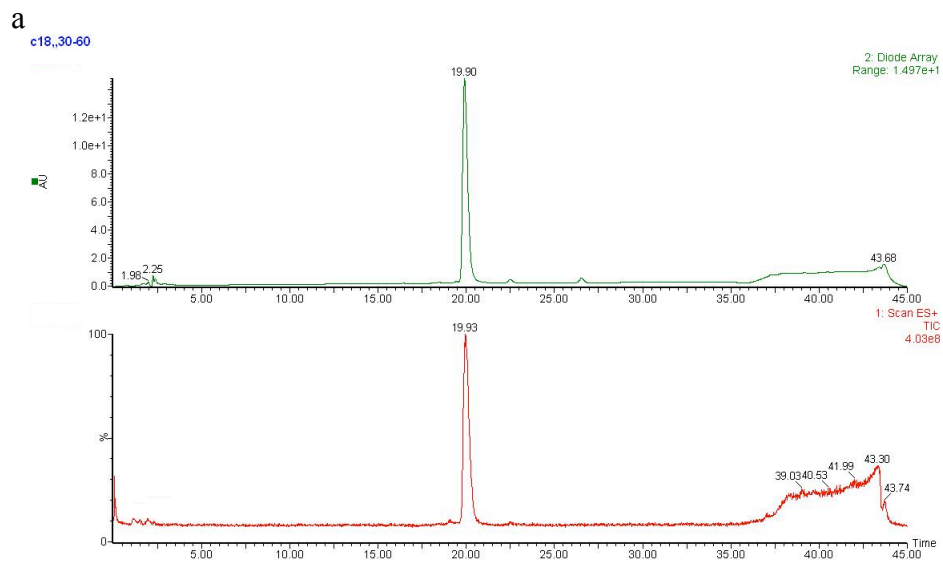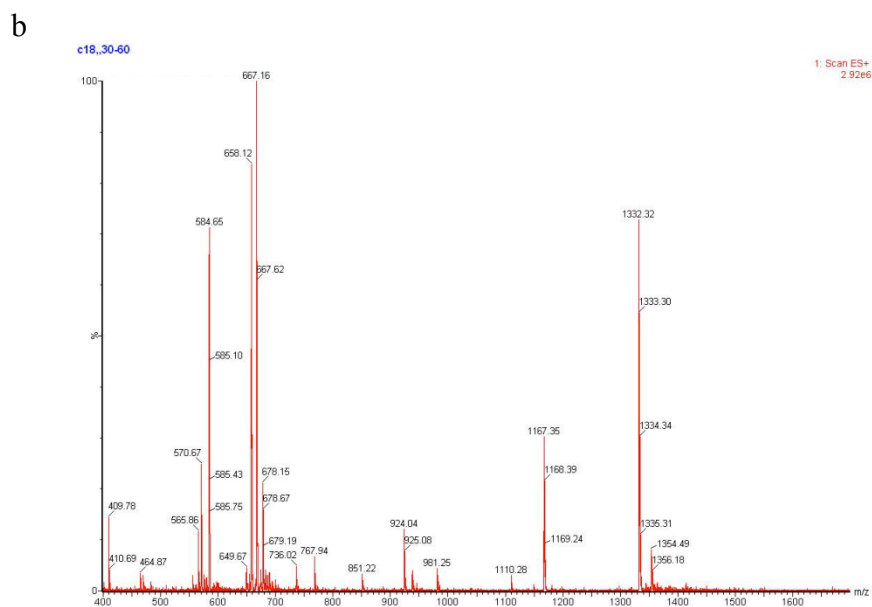

**Figure 11.** (a) UV and MS traces from LC-MS analysis of compound **17**: gradient 30-60% CH<sub>3</sub>CN/H<sub>2</sub>O over 30 min at a flow rate of 0.2 mL/min, C18 column. (b) ESI-MS of compound **17**. ESI-MS calcd for C<sub>61</sub>H<sub>82</sub>N<sub>14</sub>O<sub>18</sub>S [M+H]<sup>+</sup>  $m/z = 1331.58$ , found: 1331.93.



FmocRLGDSTAGWT—OMe (18)

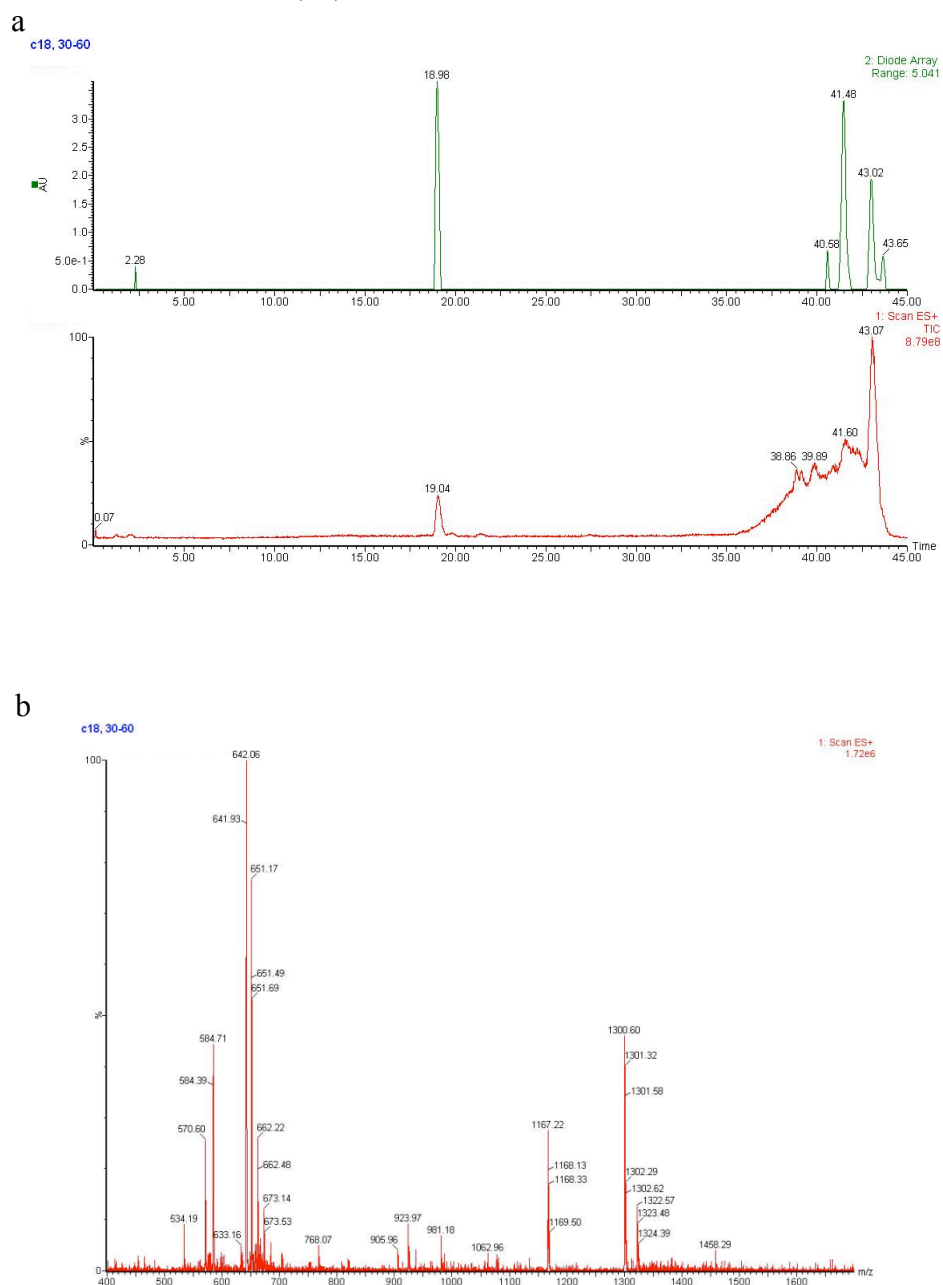

**Figure 12.** (a) UV and MS traces from LC-MS analysis of compound **18**: gradient 30-60% CH<sub>3</sub>CN/H<sub>2</sub>O over 30 min at a flow rate of 0.2 mL/min, C18 column. (b) ESI-MS of compound **18**. ESI-MS calcd for C<sub>61</sub>H<sub>82</sub>N<sub>14</sub>O<sub>18</sub> [M+H]<sup>+</sup>  $m/z$  = 1299.60, found: 1300.02.

FmocRTGDSAGT—SPh (19)

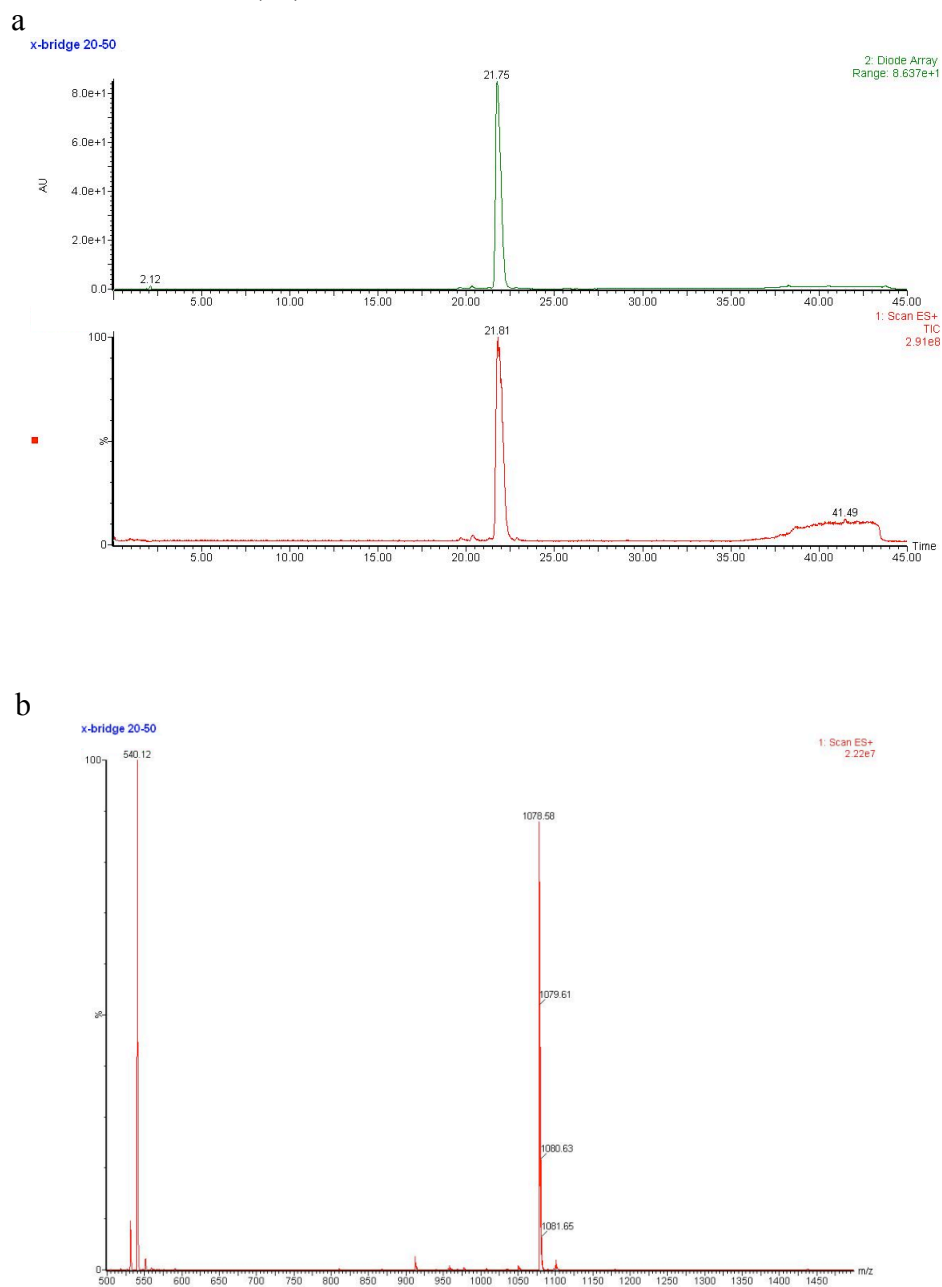

**Figure 13.** (a) UV and MS traces from LC-MS analysis of compound **19**: gradient 20-50% CH<sub>3</sub>CN/H<sub>2</sub>O over 30 min at a flow rate of 0.2 mL/min, x-bridge column. (b) ESI-MS of compound **19**. ESI-MS calcd for C<sub>49</sub>H<sub>63</sub>N<sub>11</sub>O<sub>15</sub>S [M+H]<sup>+</sup>  $m/z = 1078.43$  [M+2H]<sub>2</sub><sup>+</sup>  $m/z = 539.72$ , found: 1078.58, 540.12.

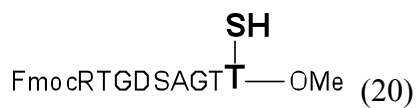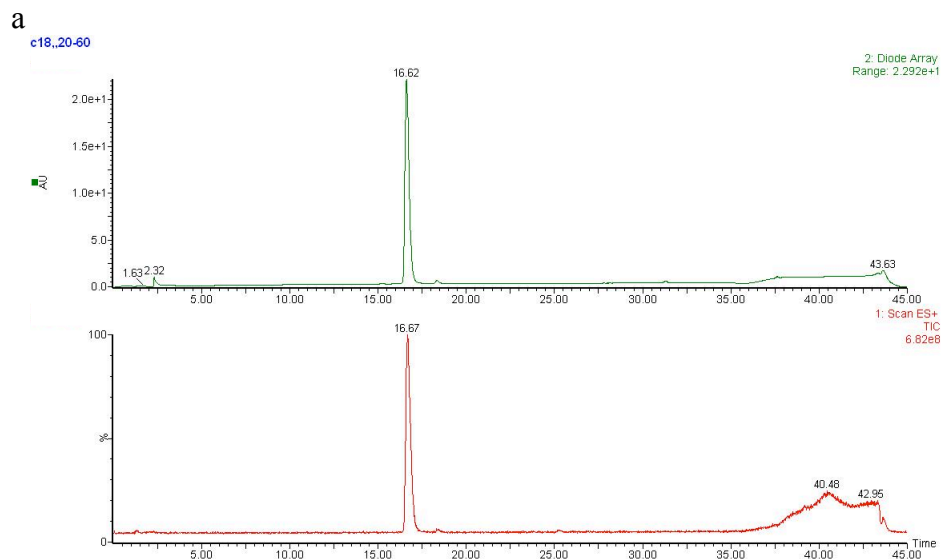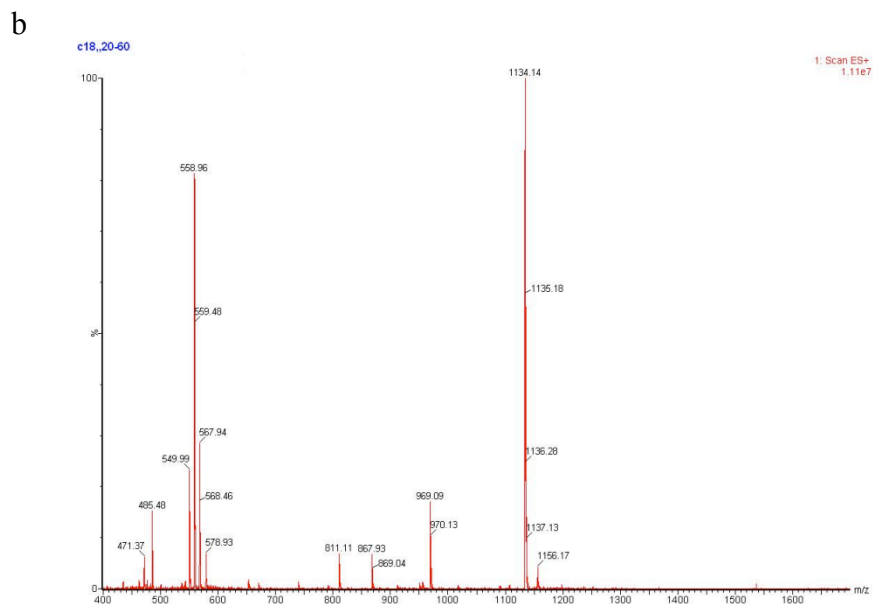

**Figure 14.** (a) UV and MS traces from LC-MS analysis of compound **20**: gradient 20-60% CH<sub>3</sub>CN/H<sub>2</sub>O over 30 min at a flow rate of 0.2 mL/min, C18 column. (b) ESI-MS of compound **20**. ESI-MS calcd for C<sub>48</sub>H<sub>68</sub>N<sub>12</sub>O<sub>18</sub>S [M+H]<sup>+</sup>  $m/z = 1133.46$ , found: 1134.01.

FmocRTGDSAGTT—OMe (21)

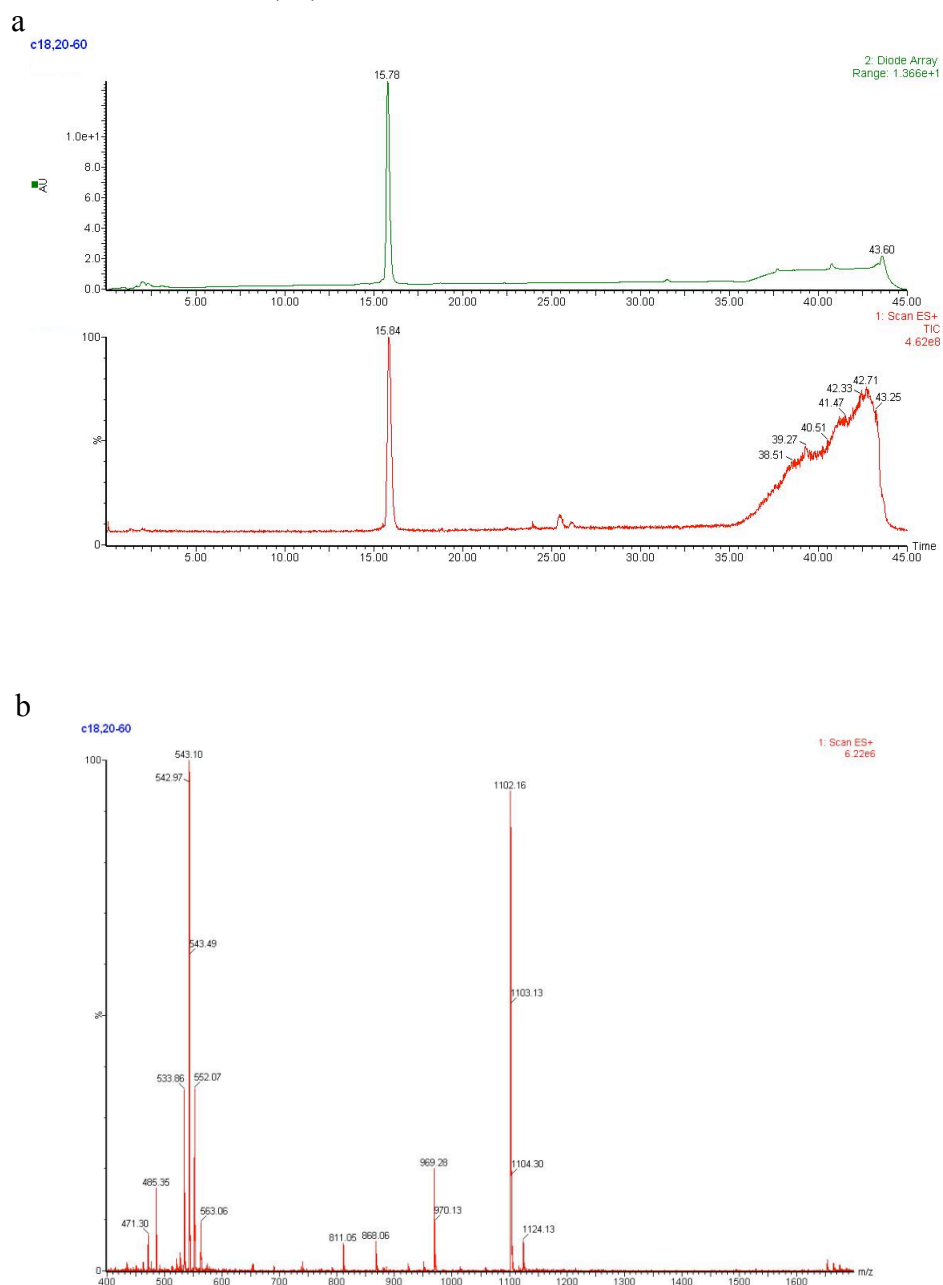

**Figure 15.** (a) UV and MS traces from LC-MS analysis of compound **21**: gradient 20-60% CH<sub>3</sub>CN/H<sub>2</sub>O over 30 min at a flow rate of 0.2 mL/min, C18 column. (b) ESI-MS of compound **21**. ESI-MS calcd for C<sub>48</sub>H<sub>68</sub>N<sub>12</sub>O<sub>18</sub> [M+H]<sup>+</sup> *m/z* = 1101.49, found: 1101.83.

FmocRLGDSTAGL—SPh (22)

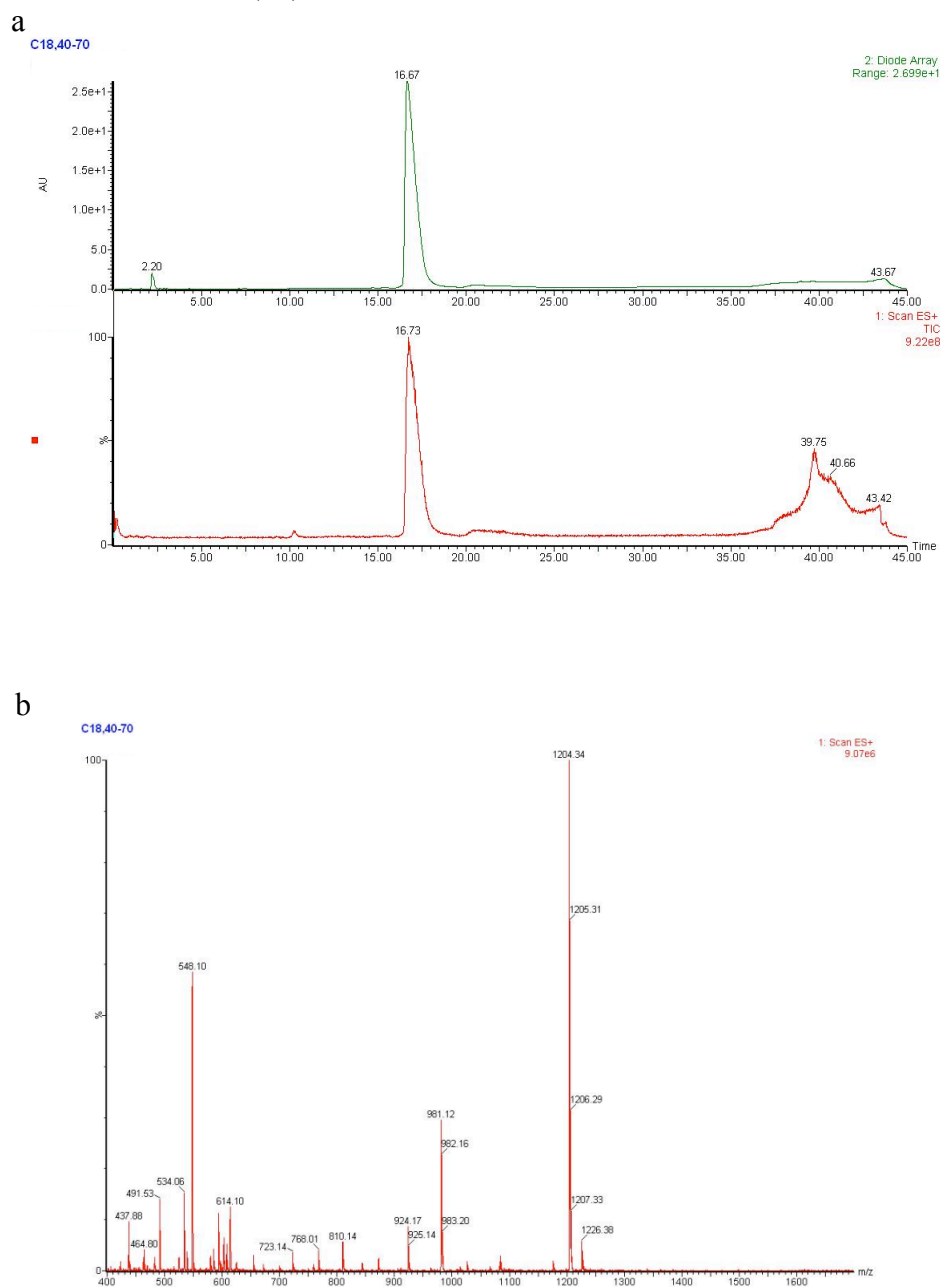

**Figure 16.** (a) UV and MS traces from LC-MS analysis of compound **22**: gradient 40-70% CH<sub>3</sub>CN/H<sub>2</sub>O over 30 min at a flow rate of 0.2 mL/min, C18 column. (b) ESI-MS of compound **22**. ESI-MS calcd for C<sub>57</sub>H<sub>78</sub>N<sub>12</sub>O<sub>15</sub>S [M+H]<sup>+</sup>  $m/z = 1203.55$ , found: 1204.02.

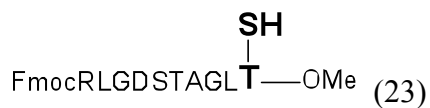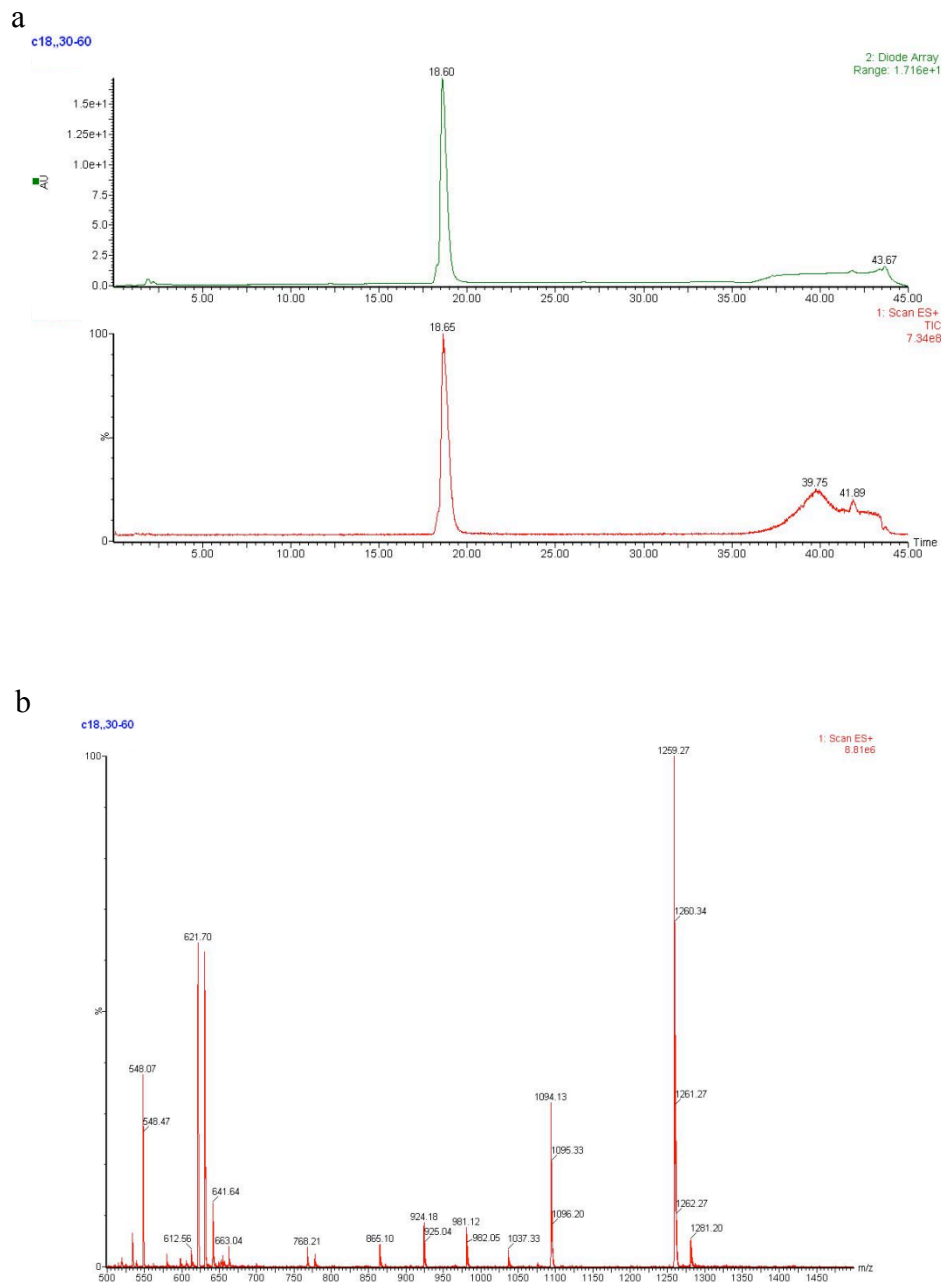

**Figure 17.** (a) UV and MS traces from LC-MS analysis of compound **23**: gradient 30-60% CH<sub>3</sub>CN/H<sub>2</sub>O over 30 min at a flow rate of 0.2 mL/min, C18 column. (b) ESI-MS of compound **23**. ESI-MS calcd for C<sub>56</sub>H<sub>83</sub>N<sub>13</sub>O<sub>18</sub>S [M+H]<sup>+</sup> *m/z* = 1258.58, found: 1259.00.

FmocRLGDSTAGLT—OMe (24)

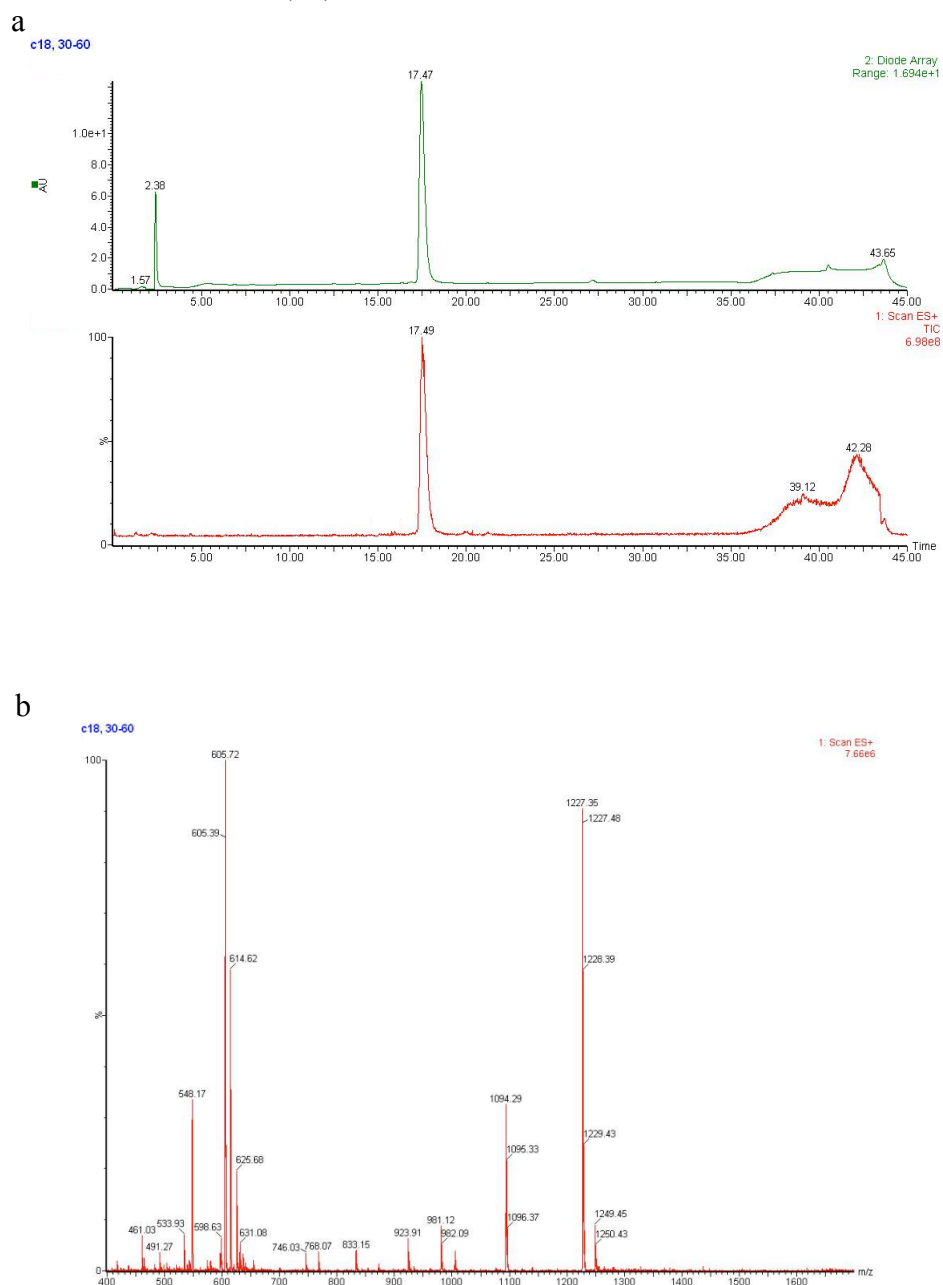

**Figure 18.** (a) UV and MS traces from LC-MS analysis of compound **24**: gradient 30-60% CH<sub>3</sub>CN/H<sub>2</sub>O over 30 min at a flow rate of 0.2 mL/min, C18 column. (b) ESI-MS of compound **24**. ESI-MS calcd for C<sub>56</sub>H<sub>83</sub>N<sub>13</sub>O<sub>18</sub> [M+H]<sup>+</sup>  $m/z$  = 1226.61, found: 1227.09.

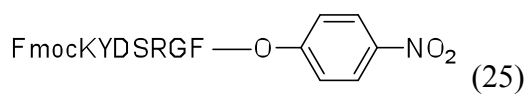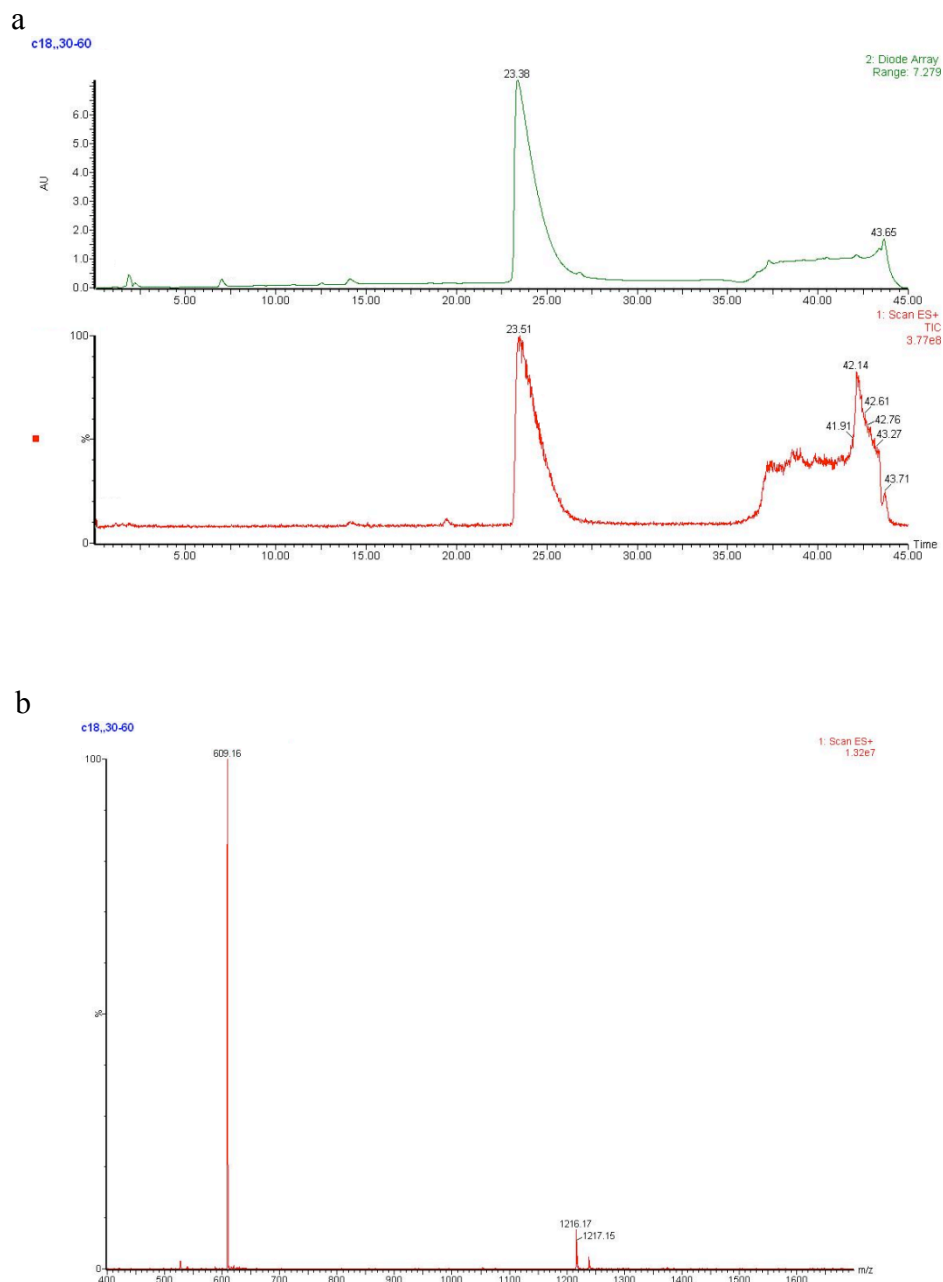

**Figure 19.** (a) UV and MS traces from LC-MS analysis of compound **25**: gradient 30-60% CH<sub>3</sub>CN/H<sub>2</sub>O over 30 min at a flow rate of 0.2 mL/min, C18 column. (b) ESI-MS of compound **25**. ESI-MS calcd for C<sub>60</sub>H<sub>70</sub>N<sub>12</sub>O<sub>16</sub> [M+H]<sup>+</sup> *m/z* = 1215.51, [M+2H]<sub>2</sub><sup>+</sup> *m/z* = 608.26; found: 1216.04, 608.71.



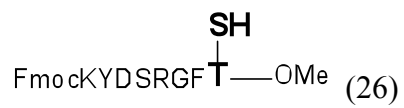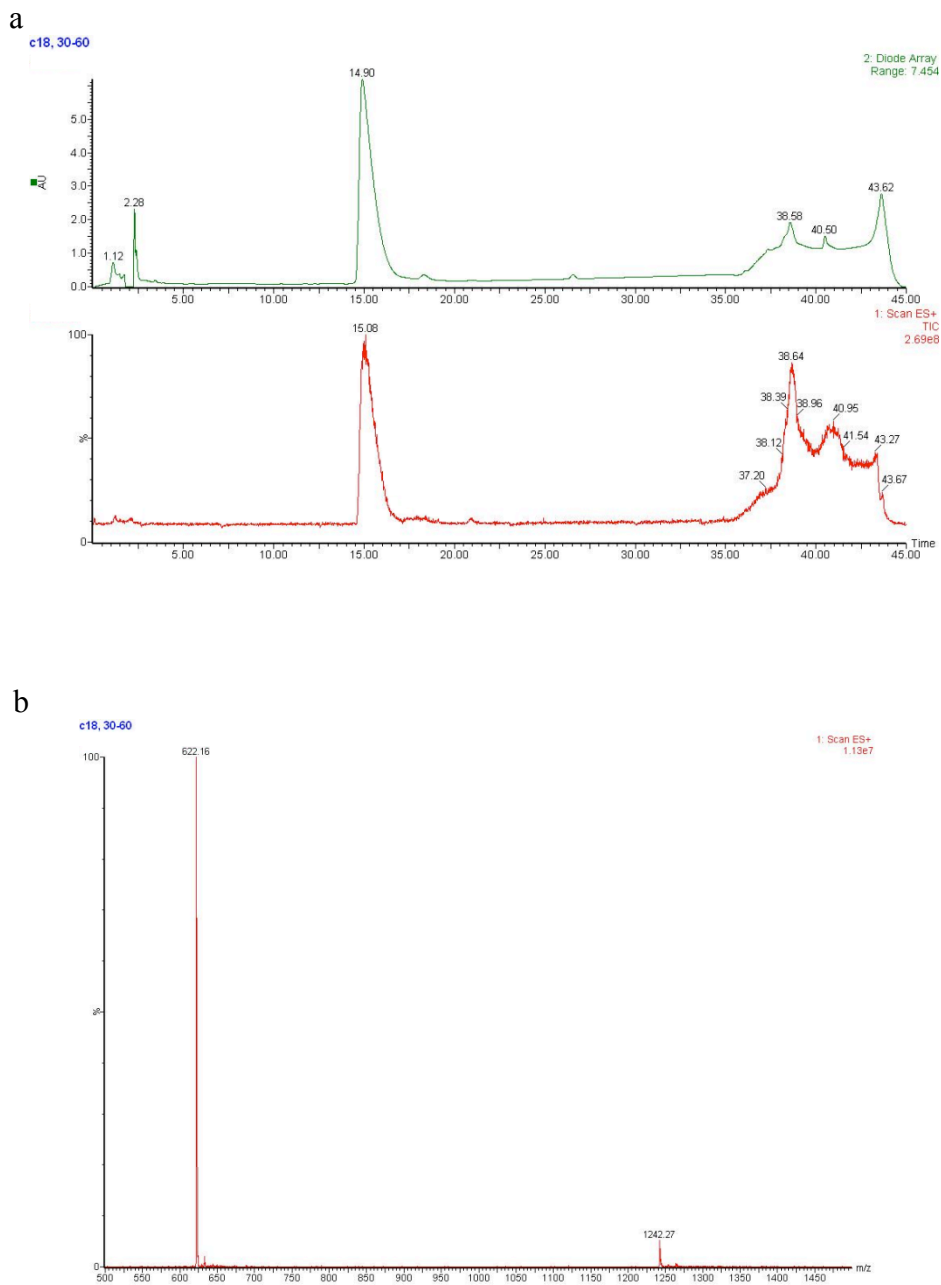

**Figure 20.** (a) UV and MS traces from LC-MS analysis of compound **26**: gradient 30-60% CH<sub>3</sub>CN/H<sub>2</sub>O over 30 min at a flow rate of 0.2 mL/min, C18 column. (b) ESI-MS of compound **26**. ESI-MS calcd for C<sub>59</sub>H<sub>76</sub>N<sub>12</sub>O<sub>16</sub>S [M+H]<sup>+</sup> *m/z* = 1241.52, [M+2H]<sub>2</sub><sup>+</sup> *m/z* = 621.27; found: 1241.94, 621.63.

FmocKYDSRGFT—OMe (27)

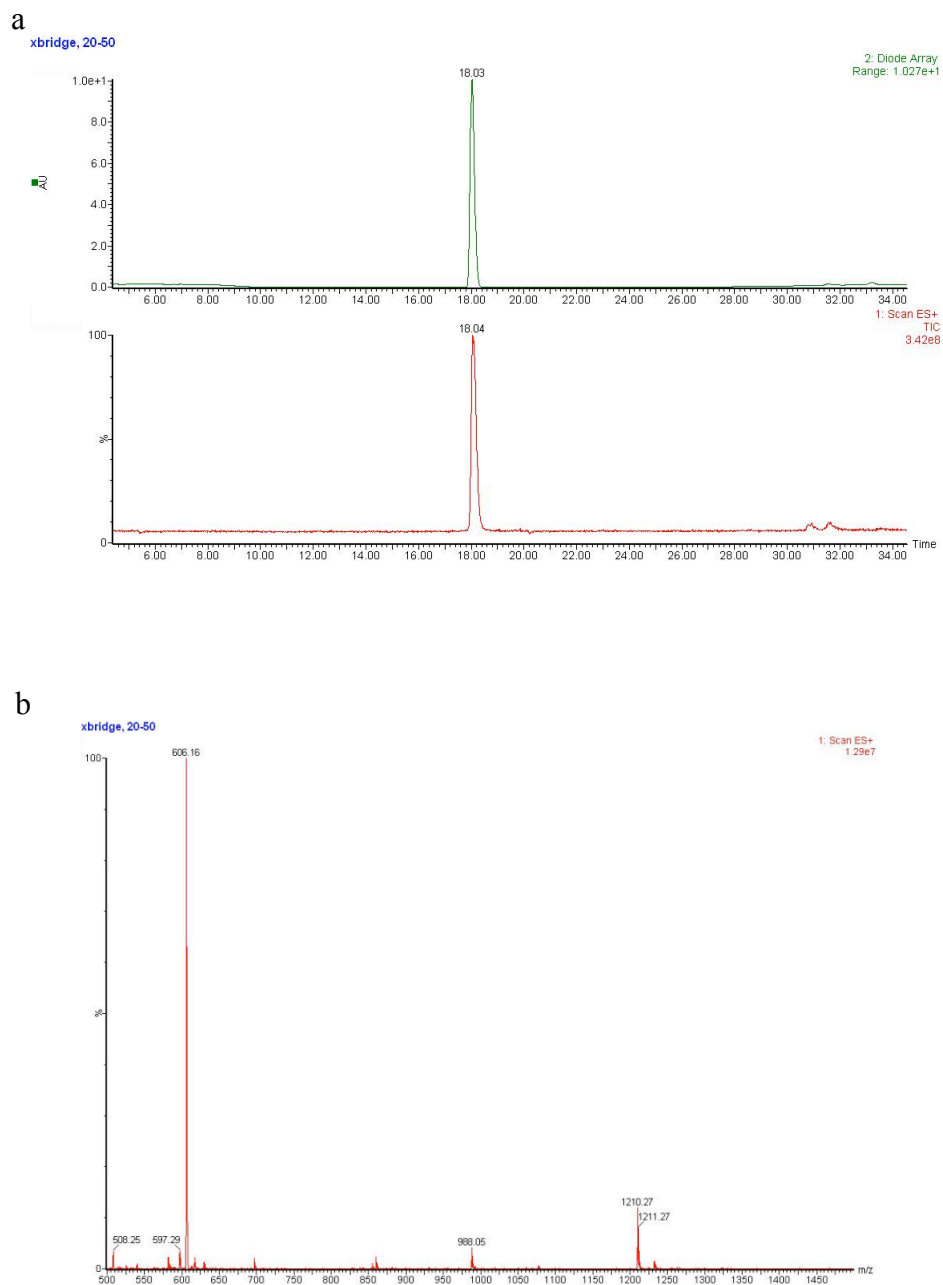

**Figure 21.** (a) UV and MS traces from LC-MS analysis of compound **27**: gradient 20-50% CH<sub>3</sub>CN/H<sub>2</sub>O over 30 min at a flow rate of 0.2 mL/min, x-bridge column. (b) ESI-MS of compound **27**. ESI-MS calcd for C<sub>59</sub>H<sub>76</sub>N<sub>12</sub>O<sub>16</sub> [M+H]<sup>+</sup> *m/z* = 1209.56, [M+2H]<sub>2</sub><sup>+</sup> *m/z* = 605.29; found: 1210.14, 605.69.

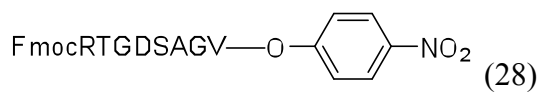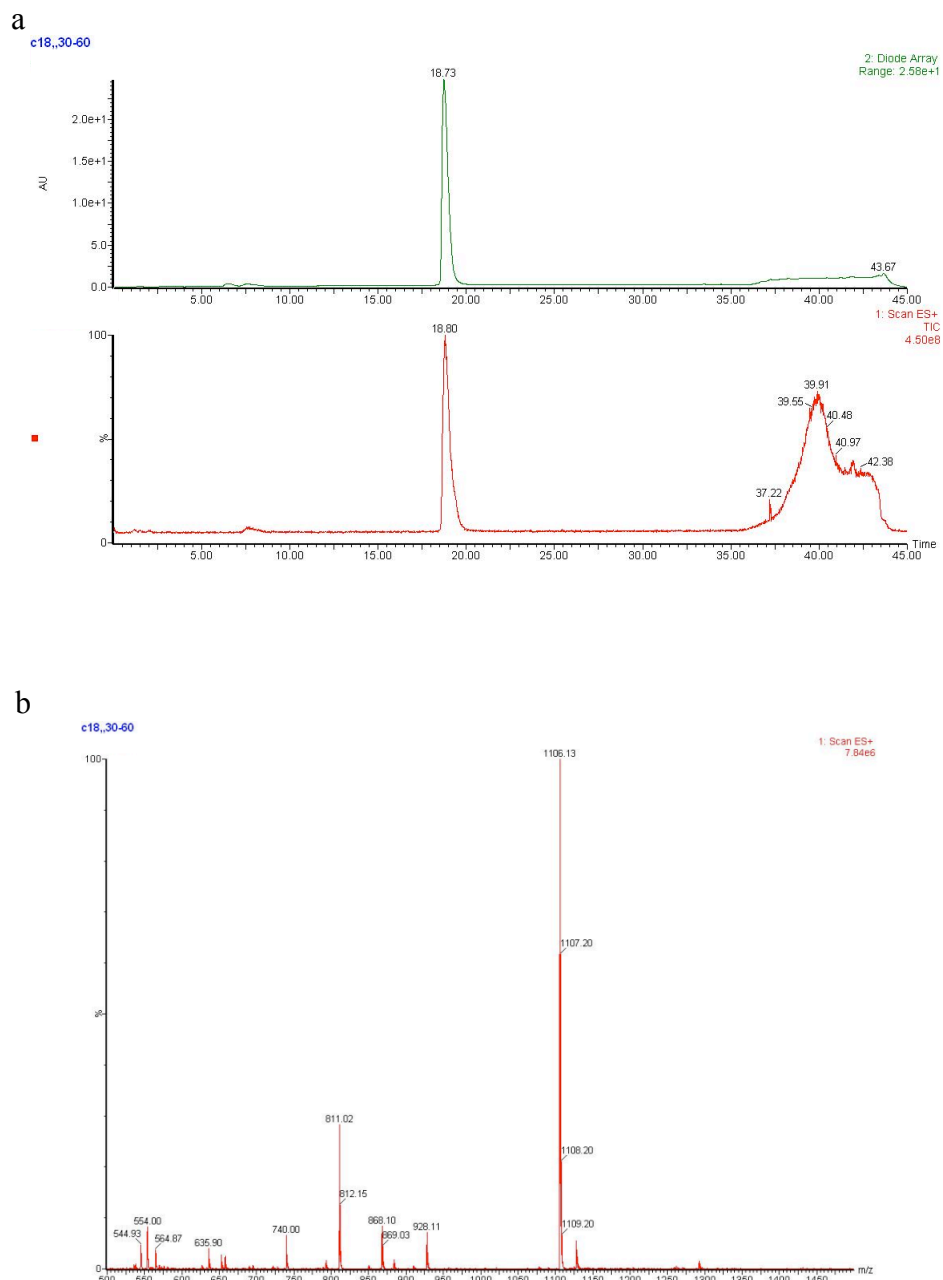

**Figure 22.** (a) UV and MS traces from LC-MS analysis of compound **28**: gradient 30-60% CH<sub>3</sub>CN/H<sub>2</sub>O over 30 min at a flow rate of 0.2 mL/min, C18 column. (b) ESI-MS of compound **28**. ESI-MS calcd for C<sub>50</sub>H<sub>64</sub>N<sub>12</sub>O<sub>17</sub> [M+H]<sup>+</sup> *m/z* = 1105.46, found: 1105.80.

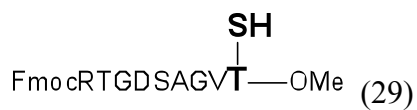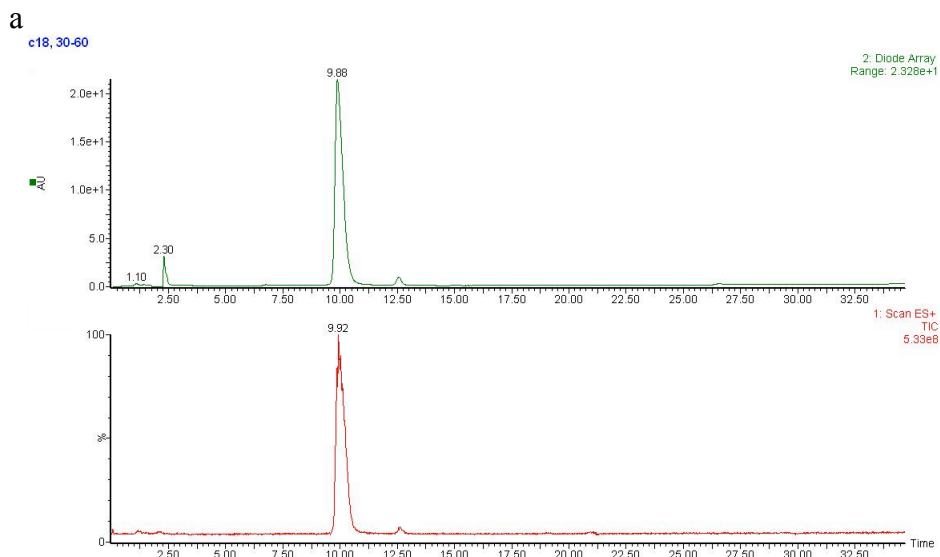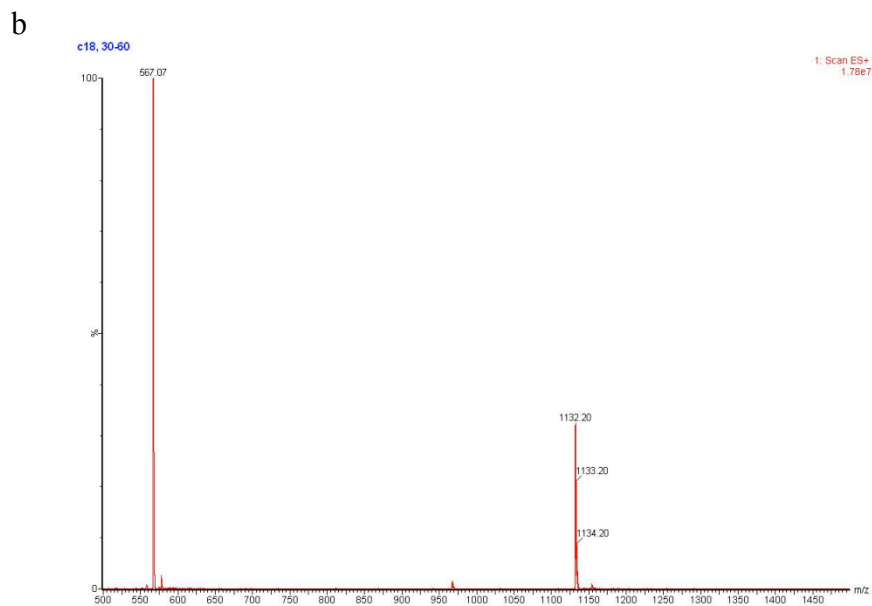

**Figure 23.** (a) UV and MS traces from LC-MS analysis of compound **29**: gradient 30-60% CH<sub>3</sub>CN/H<sub>2</sub>O over 30 min at a flow rate of 0.2 mL/min, C18 column. (b) ESI-MS of compound **29**. ESI-MS calcd for C<sub>49</sub>H<sub>70</sub>N<sub>12</sub>O<sub>17</sub>S [M+H]<sup>+</sup>  $m/z = 1131.48$ , [M+2H]<sub>2</sub><sup>+</sup>  $m/z = 566.25$ ; found: 1131.87, 566.81.

FmocRTGDSAGV**T**—OMe (30)

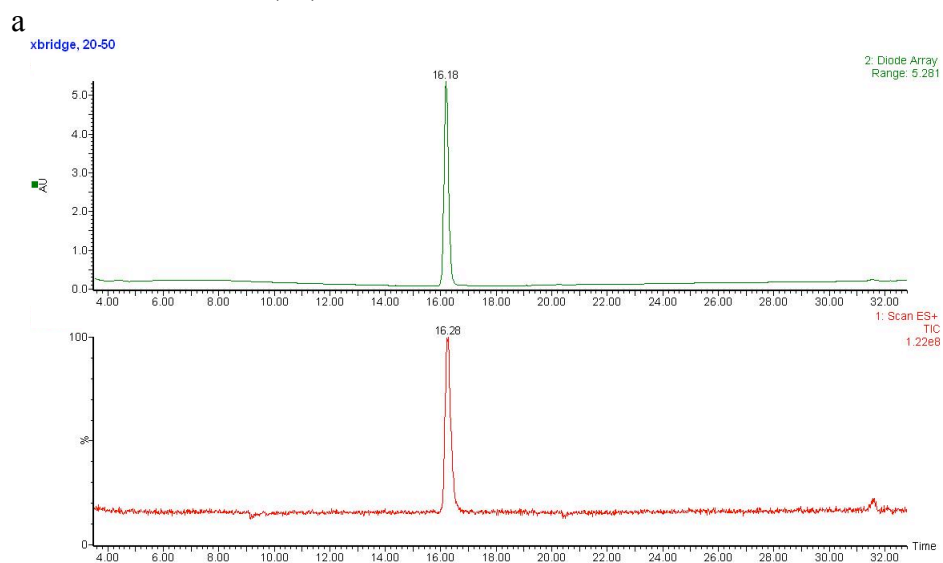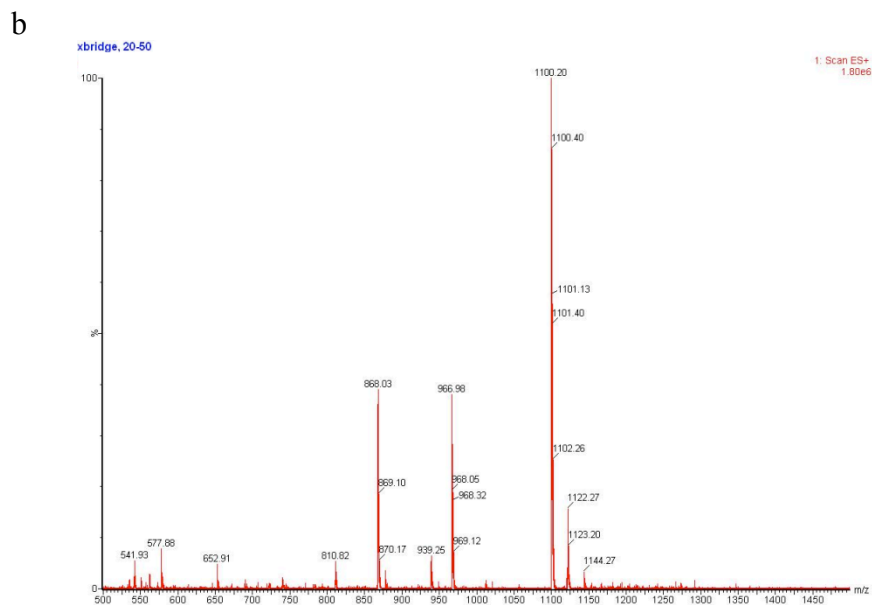

**Figure 24.** (a) UV and MS traces from LC-MS analysis of compound **30**: gradient 20-50% CH<sub>3</sub>CN/H<sub>2</sub>O over 30 min at a flow rate of 0.2 mL/min, x-bridge column. (b) ESI-MS of compound **30**. ESI-MS calcd for C<sub>49</sub>H<sub>70</sub>N<sub>12</sub>O<sub>17</sub> [M+H]<sup>+</sup> *m/z* = 1099.51, found: 1099.86.

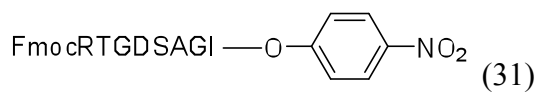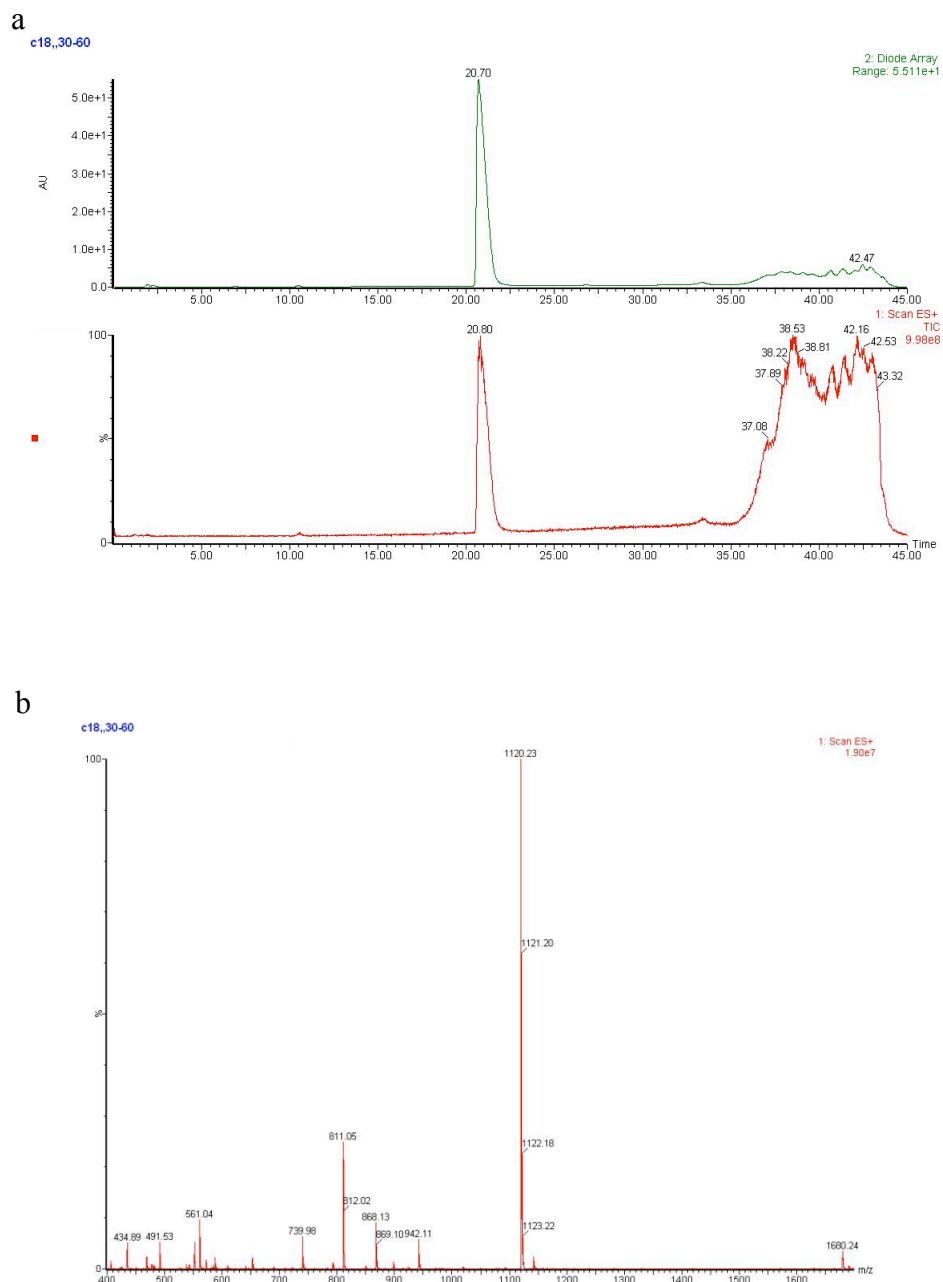

**Figure 25.** (a) UV and MS traces from LC-MS analysis of compound **31**: gradient 30-60% CH<sub>3</sub>CN/H<sub>2</sub>O over 30 min at a flow rate of 0.2 mL/min, C18 column. (b) ESI-MS of compound **31**. ESI-MS calcd for C<sub>51</sub>H<sub>66</sub>N<sub>12</sub>O<sub>17</sub> [M+H]<sup>+</sup> *m/z* = 1119.48, found: 1120.10.

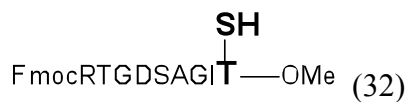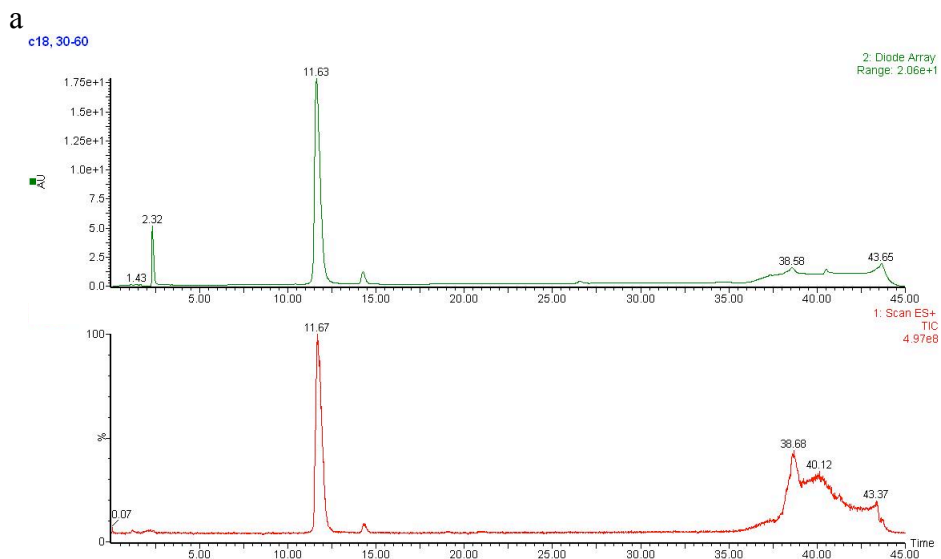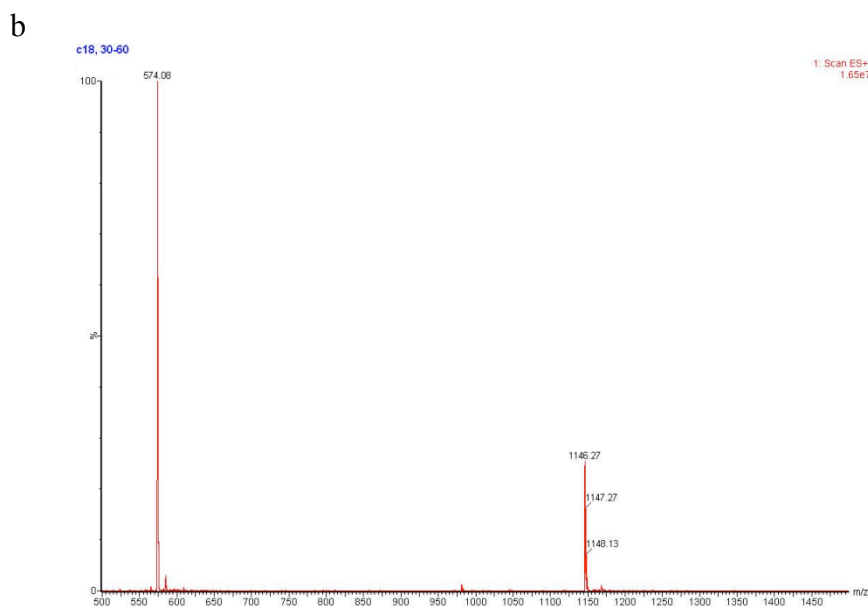

**Figure 26.** (a) UV and MS traces from LC-MS analysis of compound **32**: gradient 30-60%  $\text{CH}_3\text{CN}/\text{H}_2\text{O}$  over 30 min at a flow rate of 0.2 mL/min, x-bridge column. (b) ESI-MS of compound **32**. ESI-MS calcd for  $\text{C}_{50}\text{H}_{72}\text{N}_{12}\text{O}_{17}\text{S}$   $[\text{M}+\text{H}]^+$   $m/z = 1145.50$ ,  $[\text{M}+2\text{H}]_2^+$   $m/z = 573.26$ ; found: 1145.93, 573.68.

FmocRTGDSAGIT—OMe (33)

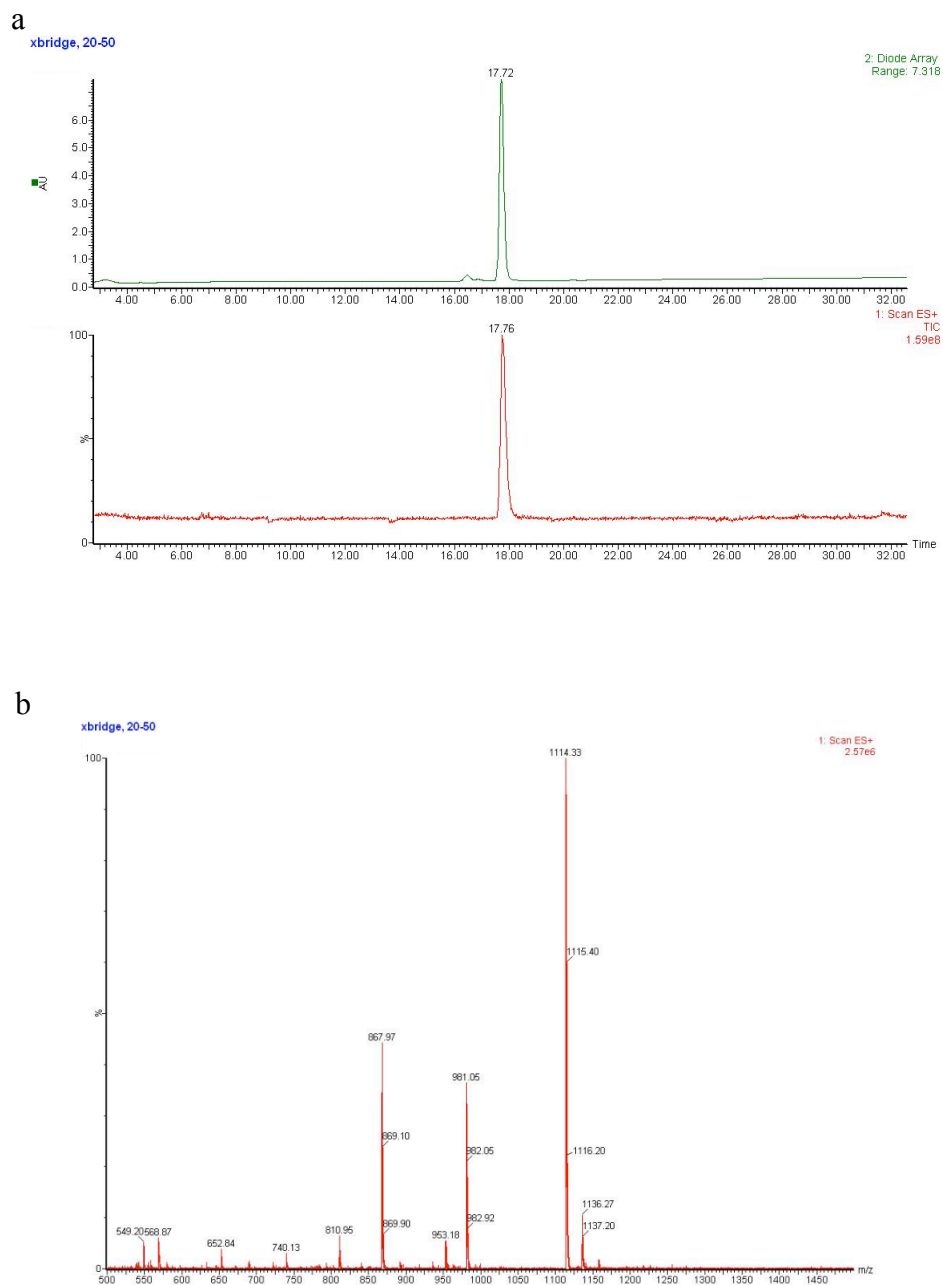

**Figure 27.** (a) UV and MS traces from LC-MS analysis of compound **33**: gradient 20-50% CH<sub>3</sub>CN/H<sub>2</sub>O over 30 min at a flow rate of 0.2 mL/min, x-bridge column. (b) ESI-MS of compound **33**. ESI-MS calcd for C<sub>50</sub>H<sub>72</sub>N<sub>12</sub>O<sub>17</sub> [M+H]<sup>+</sup>  $m/z = 1113.52$ , found: 1113.87.



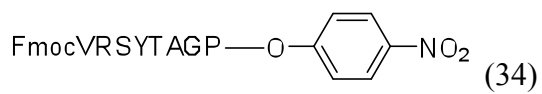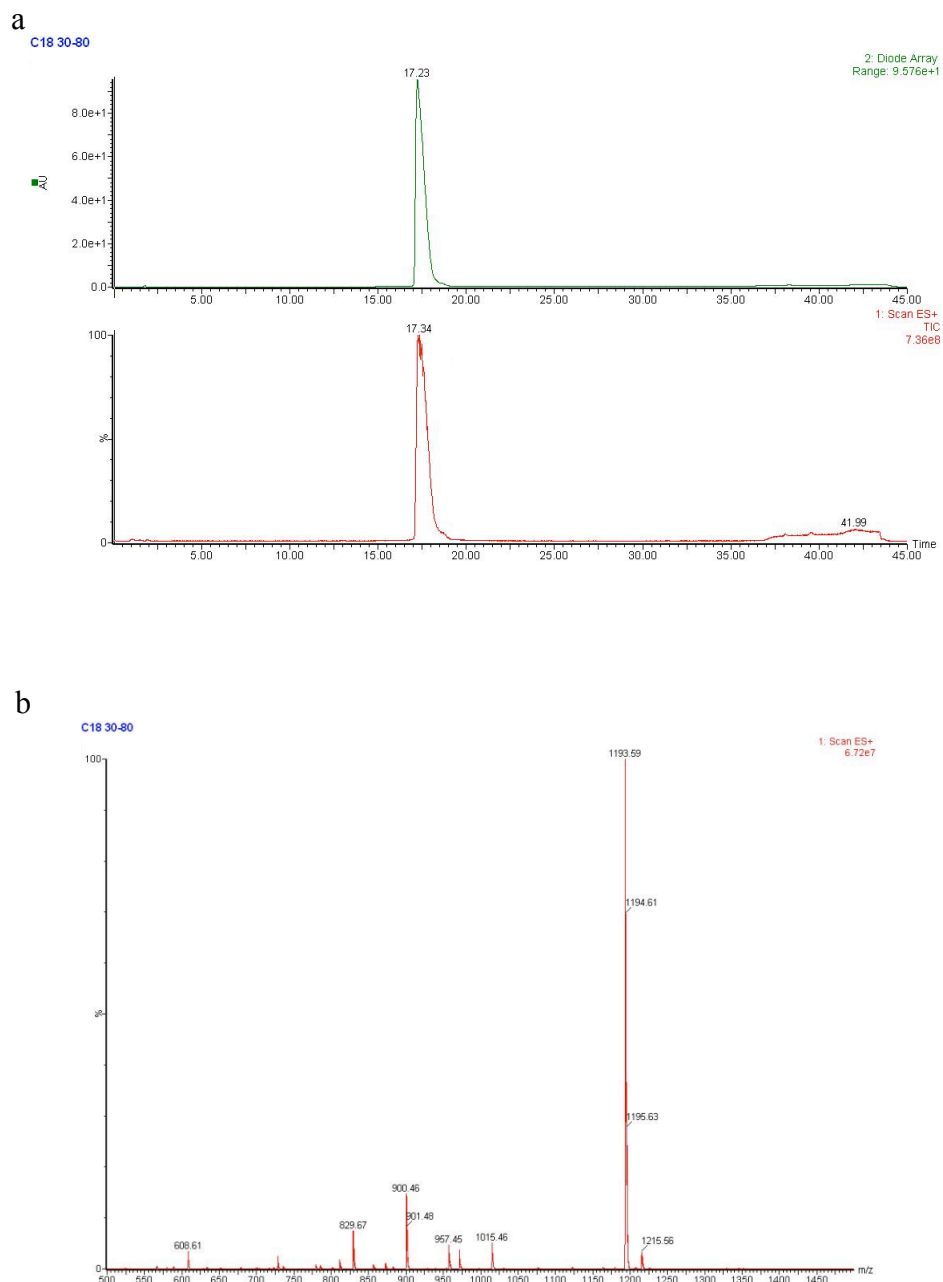

**Figure 28.** (a) UV and MS traces from LC-MS analysis of compound **34**: gradient 30-80% CH<sub>3</sub>CN/H<sub>2</sub>O over 30 min at a flow rate of 0.2 mL/min, C18 column. (b) ESI-MS of compound **34**. ESI-MS calcd for C<sub>58</sub>H<sub>72</sub>N<sub>12</sub>O<sub>16</sub> [M+H]<sup>+</sup>  $m/z$  = 1193.53, found: 1193.59.

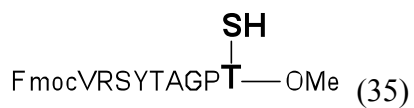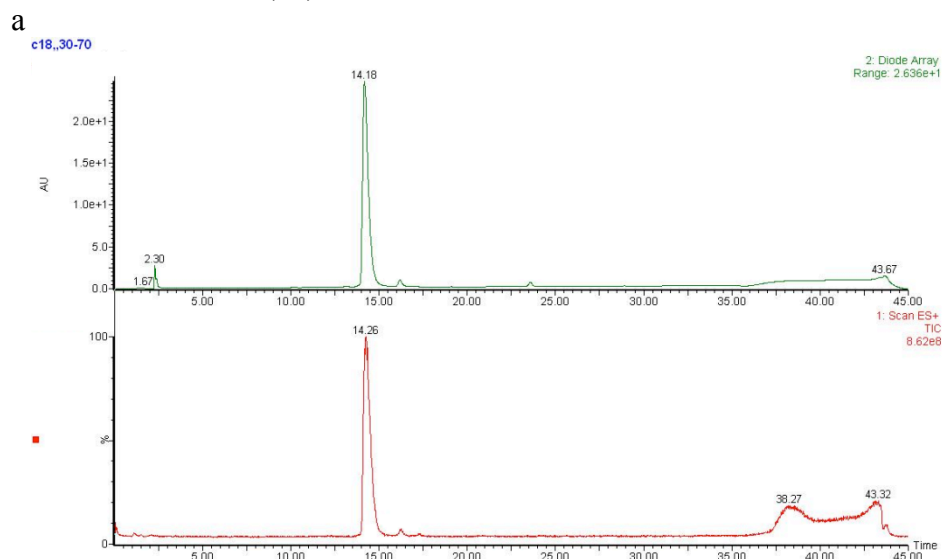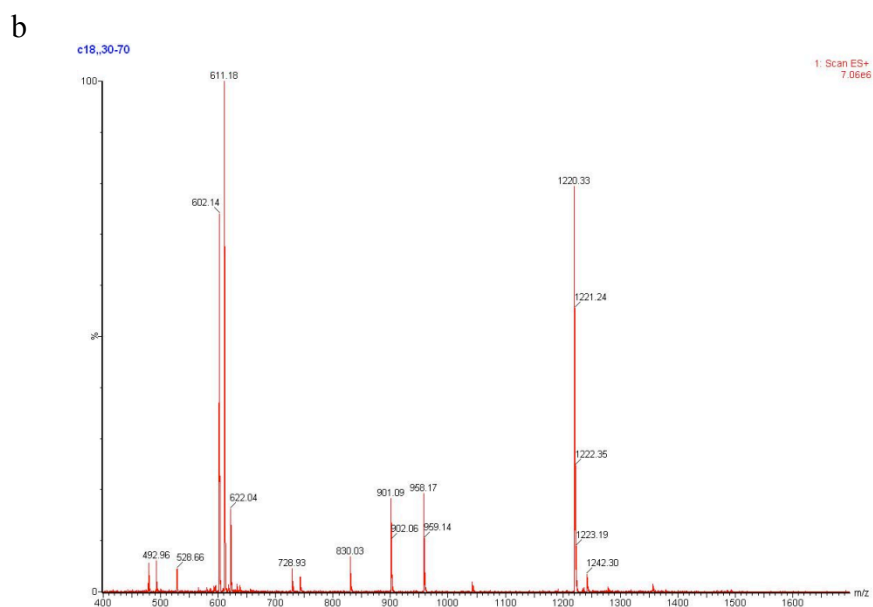

**Figure 29.** (a) UV and MS traces from LC-MS analysis of compound **35**: gradient 30-70% CH<sub>3</sub>CN/H<sub>2</sub>O over 30 min at a flow rate of 0.2 mL/min, C18 column. (b) ESI-MS of compound **35**. ESI-MS calcd for C<sub>57</sub>H<sub>78</sub>N<sub>12</sub>O<sub>16</sub>S [M+H]<sup>+</sup>;  $m/z = 1219.55$ , found: 1220.01.

FmocVRSYTAGPT—OMe (36)

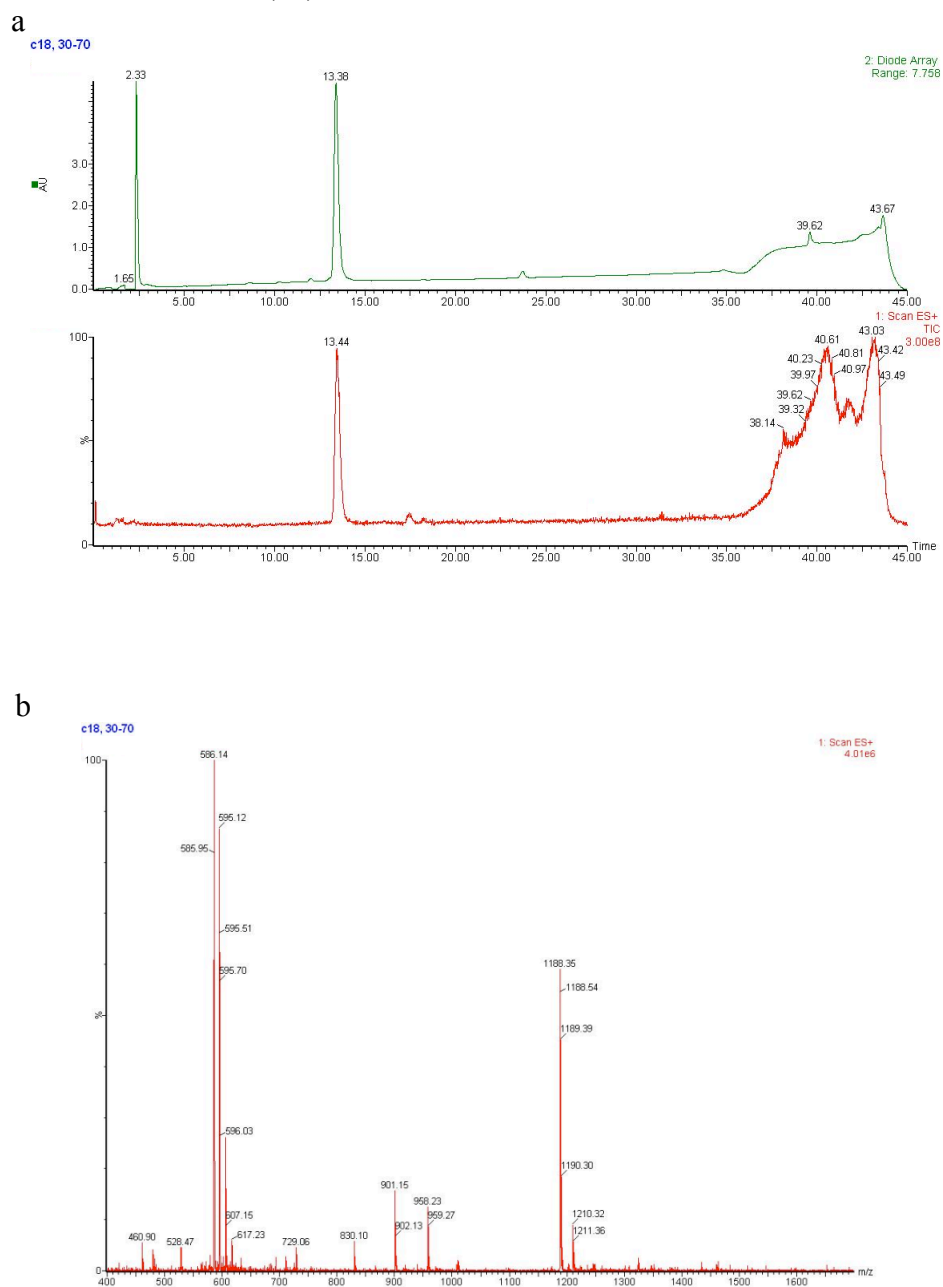

**Figure 30.** (a) UV and MS traces from LC-MS analysis of compound **36**: gradient 30-70% CH<sub>3</sub>CN/H<sub>2</sub>O over 30 min at a flow rate of 0.2 mL/min, C18 column. (b) ESI-MS of compound **36**. ESI-MS calcd for C<sub>57</sub>H<sub>78</sub>N<sub>12</sub>O<sub>16</sub> [M+H]<sup>+</sup>  $m/z$  = 1187.57, found: 1188.02.

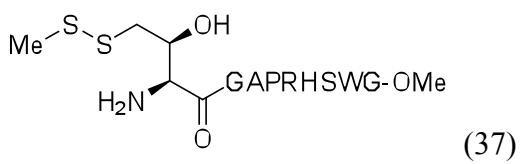

a

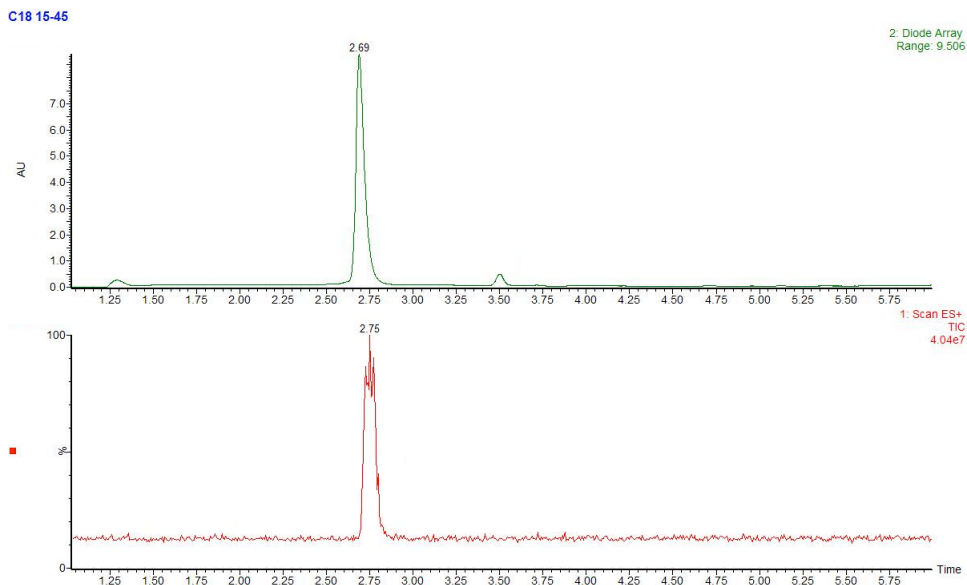

b

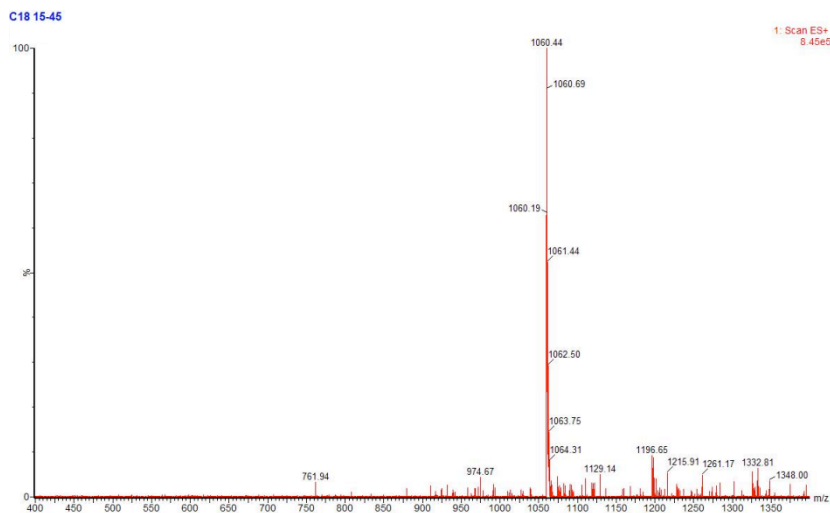

**Figure 31.** (a) UV and MS traces from LC-MS analysis of compound **37**: gradient 15-45% CH<sub>3</sub>CN/H<sub>2</sub>O over 30 min at a flow rate of 0.2 mL/min, C18 column. (b) ESI-MS of compound **37**. ESI-MS calcd for C<sub>44</sub>H<sub>65</sub>N<sub>15</sub>O<sub>12</sub>S<sub>2</sub> [M+H]<sup>+</sup> *m/z* = 1060.45, found: 1060.44.

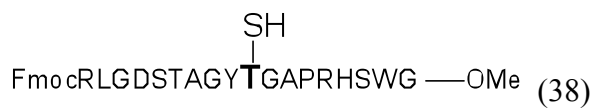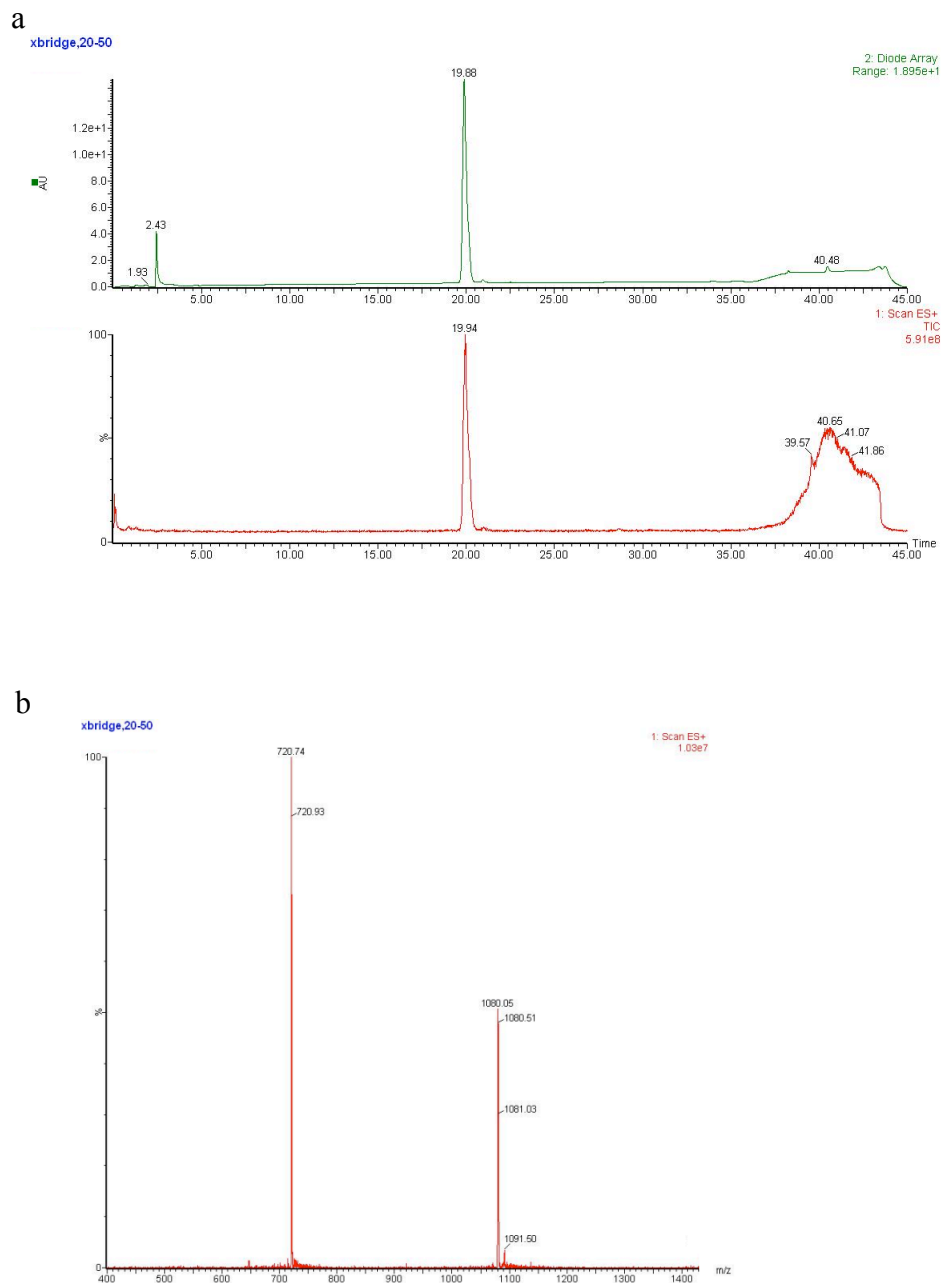

**Figure 32.** (a) UV and MS traces from LC-MS analysis of compound **38**: gradient 20-50% CH<sub>3</sub>CN/H<sub>2</sub>O over 30 min at a flow rate of 0.2 mL/min, xbridge column. (b) ESI-MS of compound **38**. ESI-MS calcd for C<sub>97</sub>H<sub>133</sub>N<sub>27</sub>O<sub>28</sub>S [M+2H]<sub>2</sub><sup>+</sup>  $m/z = 1078.99$ , [M+3H]<sub>3</sub><sup>+</sup>  $m/z = 719.66$ , found: 1079.34, 719.96.

FmocRLGDSTAGYTGAPRHSWG—OMe (39)

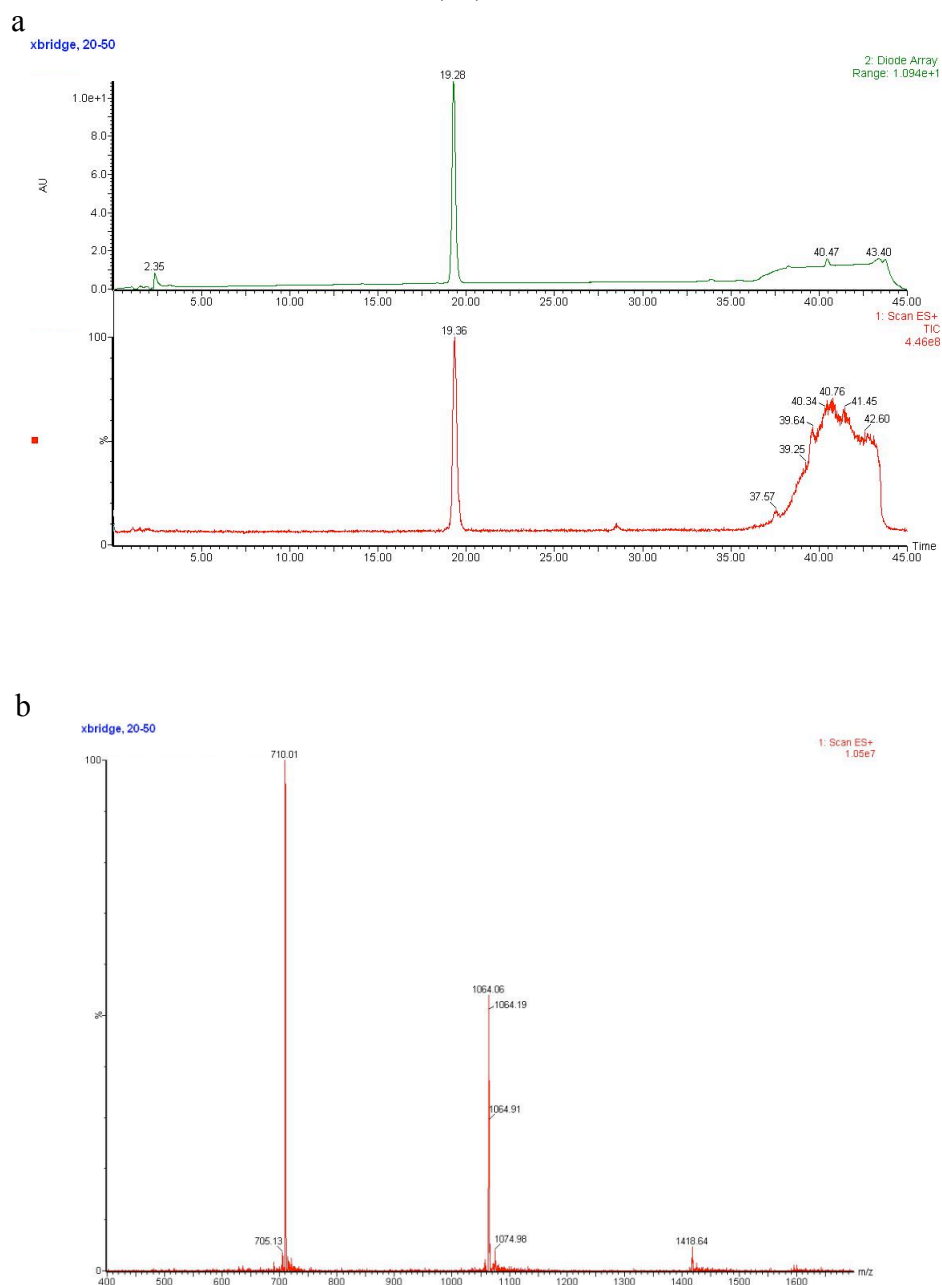

**Figure 33.** (a) UV and MS traces from LC-MS analysis of compound **39**: gradient 20-50% CH<sub>3</sub>CN/H<sub>2</sub>O over 30 min at a flow rate of 0.2 mL/min, xbridge column. (b) ESI-MS of compound **39**. ESI-MS calcd for C<sub>97</sub>H<sub>133</sub>N<sub>27</sub>O<sub>28</sub> [M+2H]<sub>2</sub><sup>+</sup> *m/z* = 1063.00, [M+3H]<sub>3</sub><sup>+</sup> *m/z* = 709.00, found: 1063.35, 709.23.

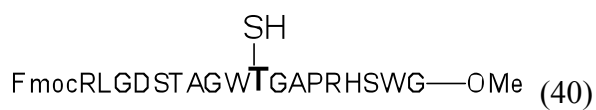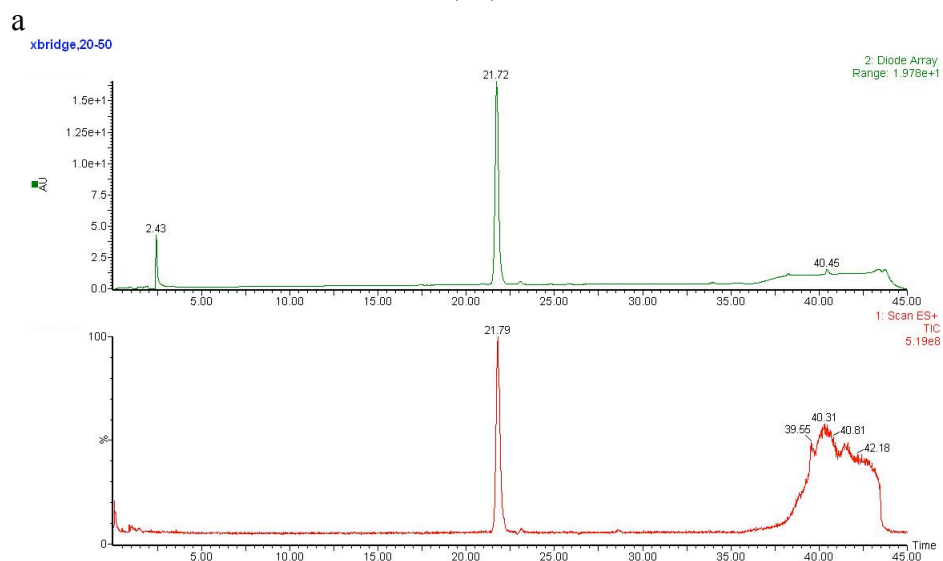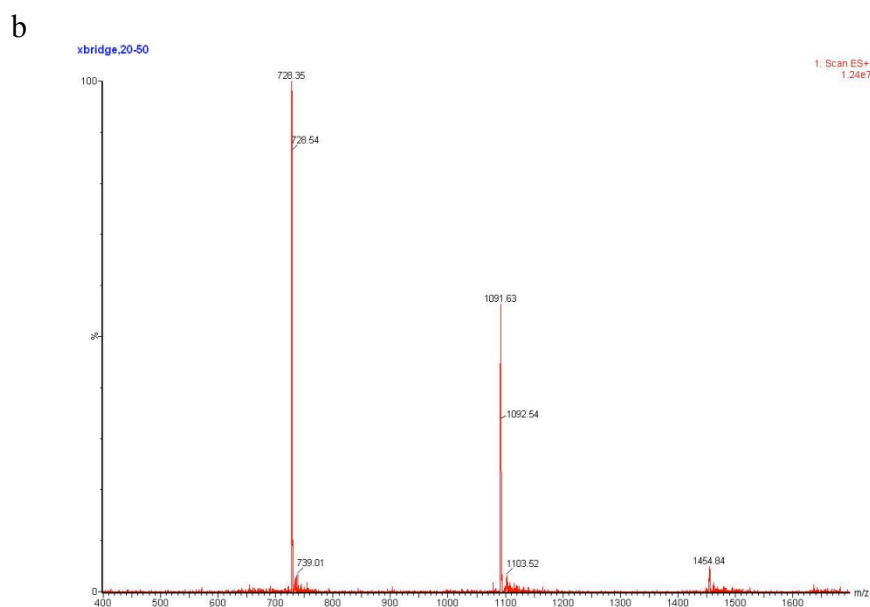

**Figure 34.** (a) UV and MS traces from LC-MS analysis of compound **40**: gradient 20-50% CH<sub>3</sub>CN/H<sub>2</sub>O over 30 min at a flow rate of 0.2 mL/min, xbridge column. (b) ESI-MS of compound **40**. ESI-MS calcd for C<sub>99</sub>H<sub>134</sub>N<sub>28</sub>O<sub>27</sub>S [M+2H]<sub>2</sub><sup>+</sup>  $m/z$  = 1090.50, [M+3H]<sub>3</sub><sup>+</sup>  $m/z$  = 727.33, found: 1090.91, 727.57.

FmocRLGDSTAGWTGAPRHSWG—OMe (41)

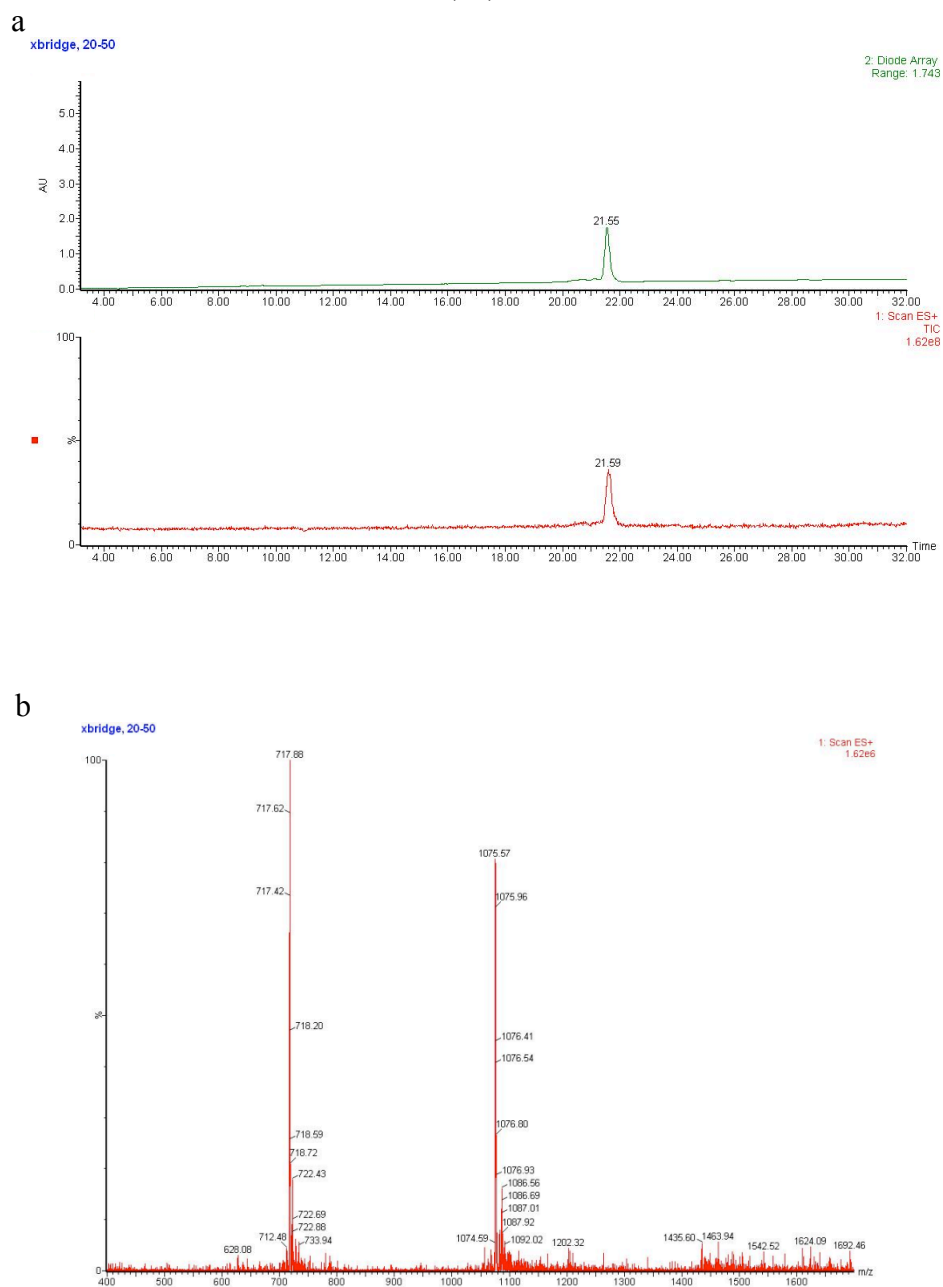

**Figure 35.** (a) UV and MS traces from LC-MS analysis of compound **41**: gradient 20-50% CH<sub>3</sub>CN/H<sub>2</sub>O over 30 min at a flow rate of 0.2 mL/min, xbridge column. (b) ESI-MS of compound **41**. ESI-MS calcd for C<sub>99</sub>H<sub>134</sub>N<sub>28</sub>O<sub>27</sub> [M+2H]<sub>2</sub><sup>+</sup> *m/z* = 1074.50, [M+3H]<sub>3</sub><sup>+</sup> *m/z* = 716.68, found: 1074.79, 716.97.



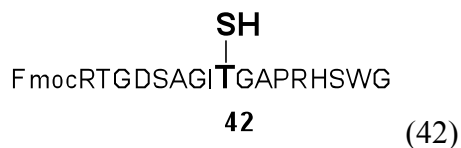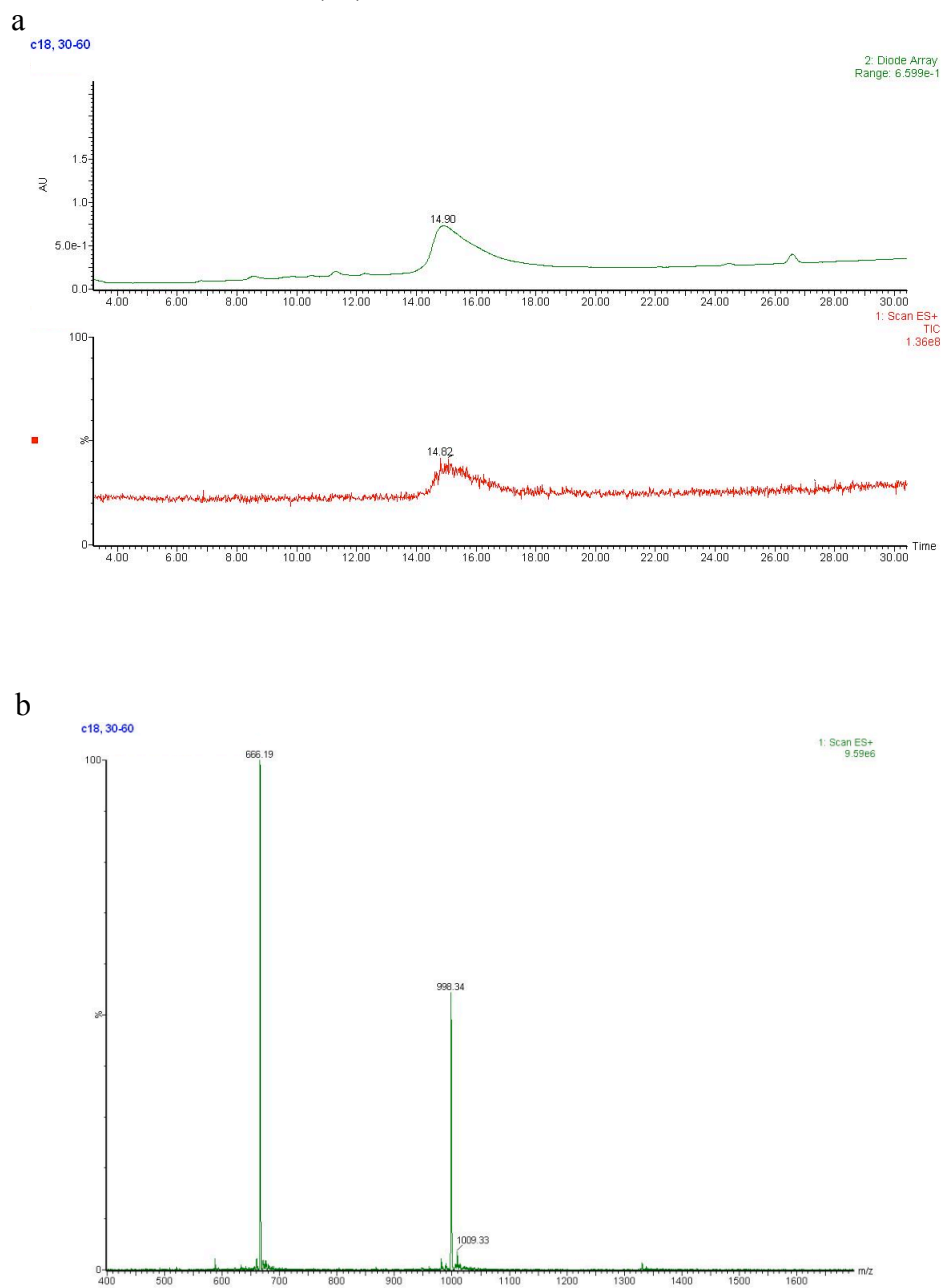

**Figure 36.** (a) UV and MS traces from LC-MS analysis of compound **42**: gradient 30-60% CH<sub>3</sub>CN/H<sub>2</sub>O over 30 min at a flow rate of 0.2 mL/min, C18 column. (b) ESI-MS of compound **42**. ESI-MS calcd for C<sub>88</sub>H<sub>124</sub>N<sub>26</sub>O<sub>26</sub>S [M+2H]<sub>2</sub><sup>+</sup> *m/z* = 997.46, [M+3H]<sub>3</sub><sup>+</sup> *m/z* = 665.31, found: 997.82, 665.60.

FmocRTGDSAGITGAPRHSWG (43)

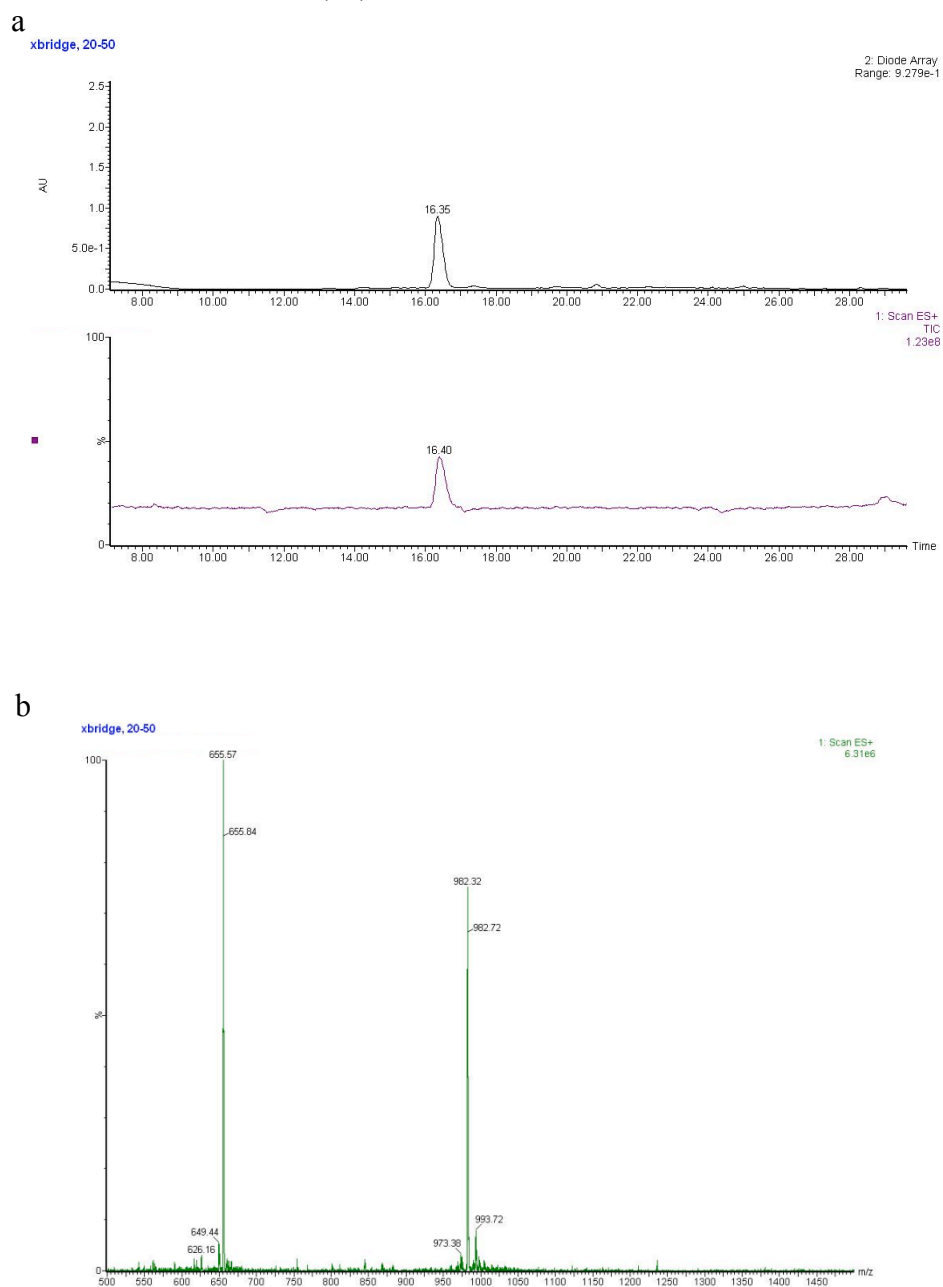

**Figure 37.** (a) UV and MS traces from LC-MS analysis of compound **43**: gradient 20-50%CH<sub>3</sub>CN/H<sub>2</sub>O over 30 min at a flow rate of 0.2 mL/min, xbridge column. (b) ESI-MS of compound **43**. ESI-MS calcd for C<sub>88</sub>H<sub>124</sub>N<sub>26</sub>O<sub>26</sub> [M+2H]<sub>2</sub><sup>+</sup> *m/z* = 981.47, [M+3H]<sub>3</sub><sup>+</sup> *m/z* = 654.65, found: 981.72, 654.97.

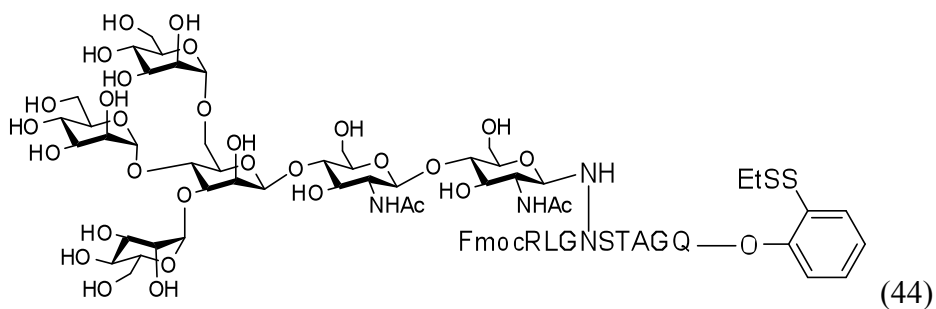

a

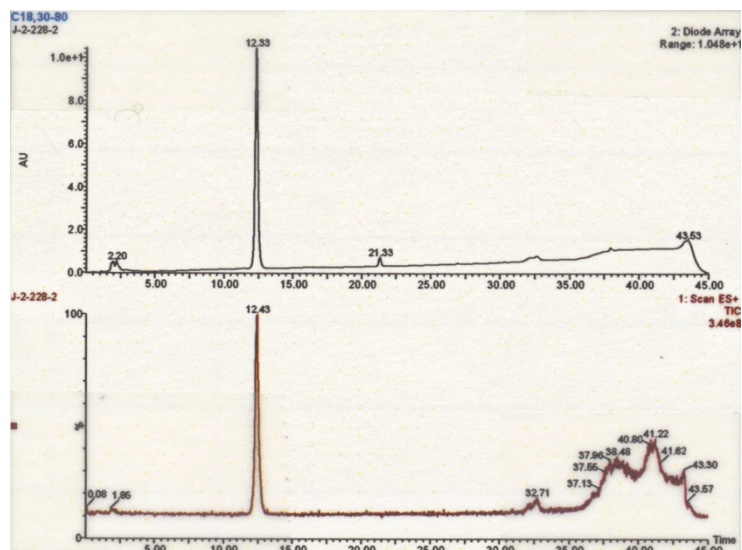

b

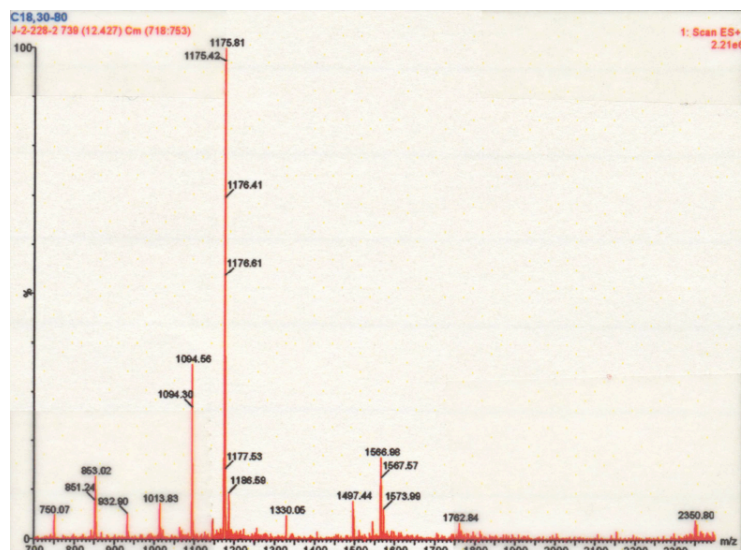

**Figure 38.** (a) UV and MS traces from LC-MS analysis of compound **44**: gradient 30-80% CH<sub>3</sub>CN/H<sub>2</sub>O over 30 min at a flow rate of 0.2 mL/min, C18 column. (b) ESI-MS of compound **44**. ESI-MS calcd for C<sub>98</sub>H<sub>146</sub>N<sub>16</sub>O<sub>46</sub>S<sub>2</sub> [M+2H]<sub>2</sub><sup>+</sup> *m/z* = 1174.46, found: 1175.42.

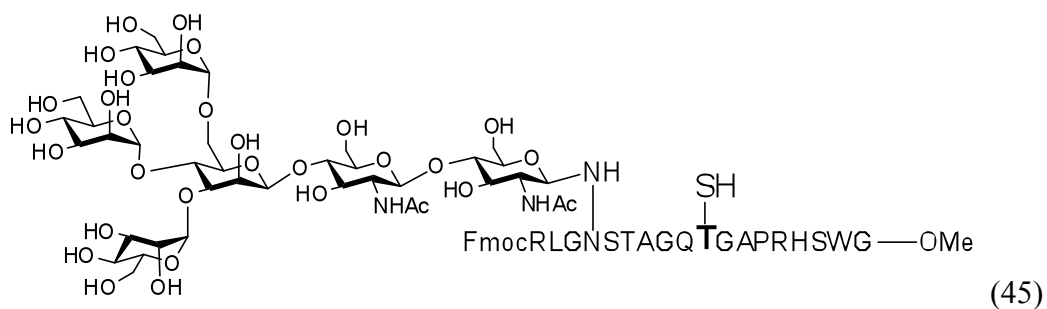

a

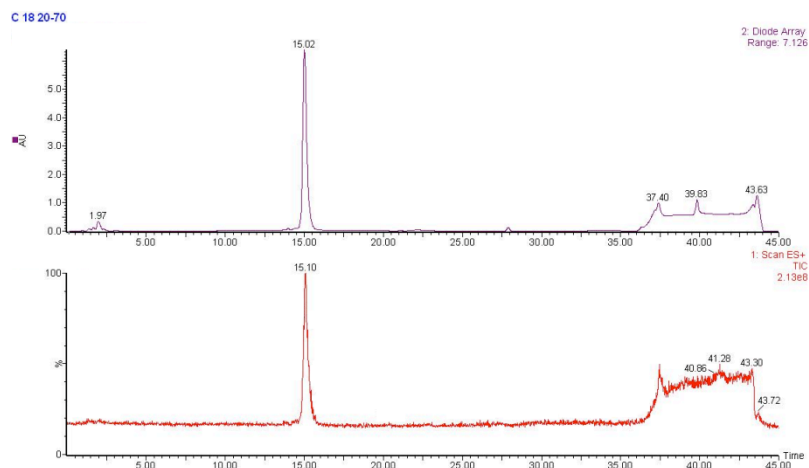

b

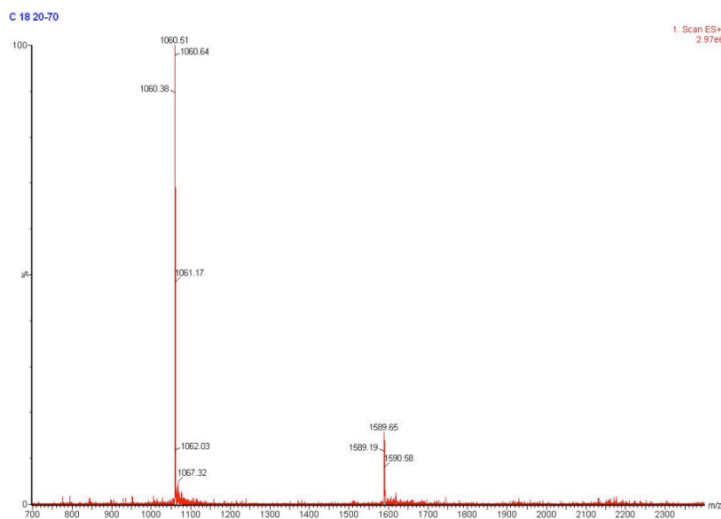

**Figure 39.** (a) UV and MS traces from LC-MS analysis of compound **45**: gradient 20-70%CH<sub>3</sub>CN/H<sub>2</sub>O over 30 min at a flow rate of 0.2 mL/min, C18 column. (b) ESI-MS of compound **45**. ESI-MS calcd for C<sub>133</sub>H<sub>199</sub>N<sub>31</sub>O<sub>57</sub>S [M+2H]<sub>2</sub><sup>+</sup> *m/z* = 1588.18, [M+3H]<sub>3</sub><sup>+</sup> *m/z* = 1059.12, found: 1588.27, 1059.25.

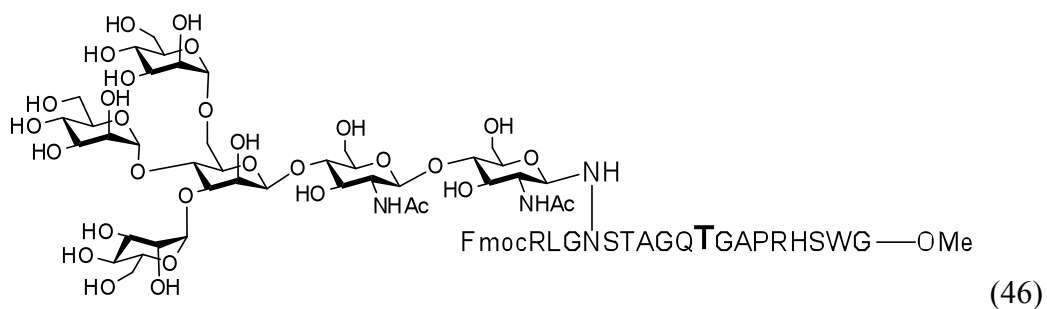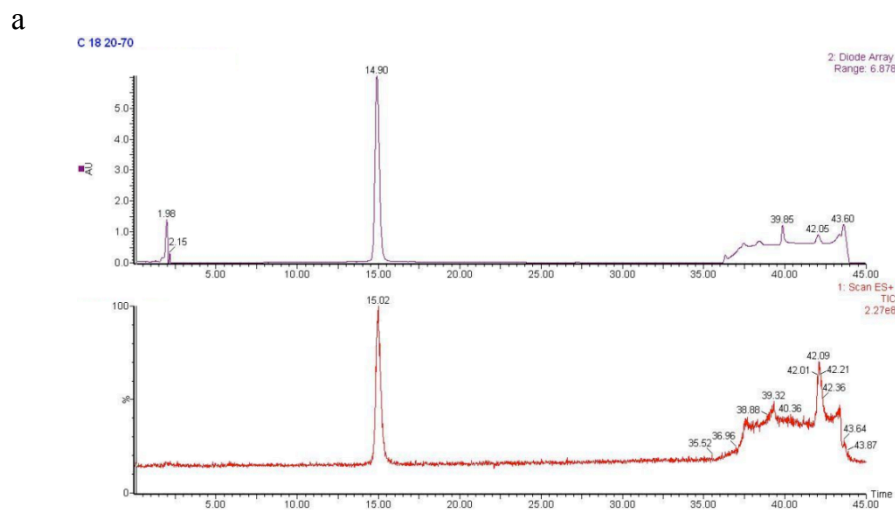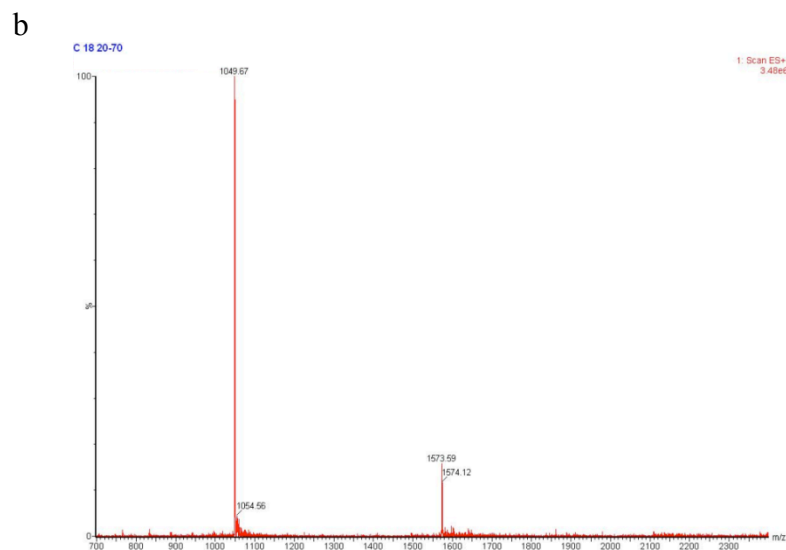

**Figure 40.** (a) UV and MS traces from LC-MS analysis of compound **46**: gradient 20-70%CH<sub>3</sub>CN/H<sub>2</sub>O over 30 min at a flow rate of 0.2 mL/min, C18 column. (b) ESI-MS of compound **46**. ESI-MS calcd for C<sub>133</sub>H<sub>199</sub>N<sub>31</sub>O<sub>57</sub> [M+2H]<sub>2</sub><sup>+</sup> *m/z* = 1572.19, [M+3H]<sub>3</sub><sup>+</sup> *m/z* = 1048.46, found: 1572.66, 1048.74.

**LC-MS monitor of reactions in table 1 and table 2**

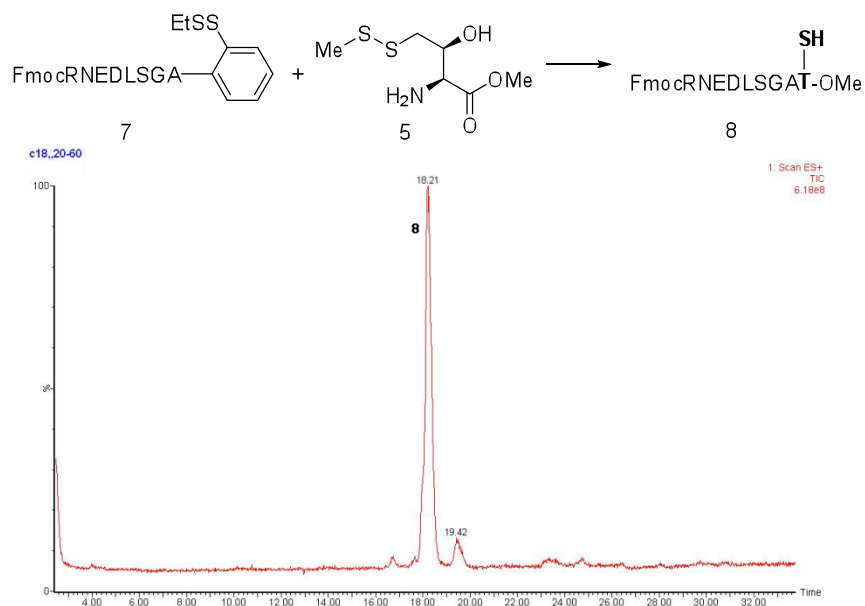

**Figure 41.** LC-MS trace of ligation between **7** and **5** at 1 h: gradient 20-60% CH<sub>3</sub>CN/H<sub>2</sub>O over 30 min at a flow rate of 0.2 mL/min, C18 column.

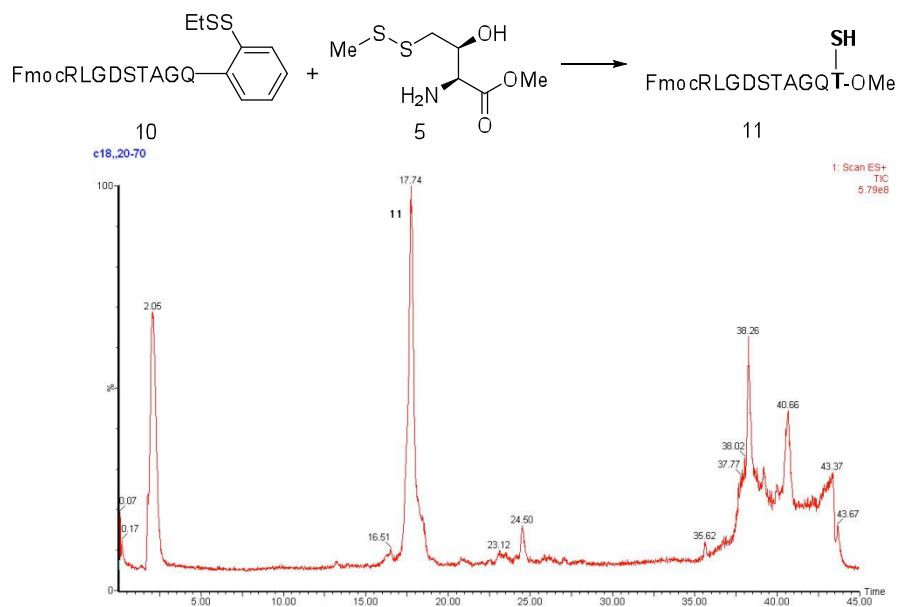

**Figure 42.** LC-MS trace of ligation between **10** and **5** at 30 min: gradient 20-70% CH<sub>3</sub>CN/H<sub>2</sub>O over 30 min at a flow rate of 0.2 mL/min, C18 column.

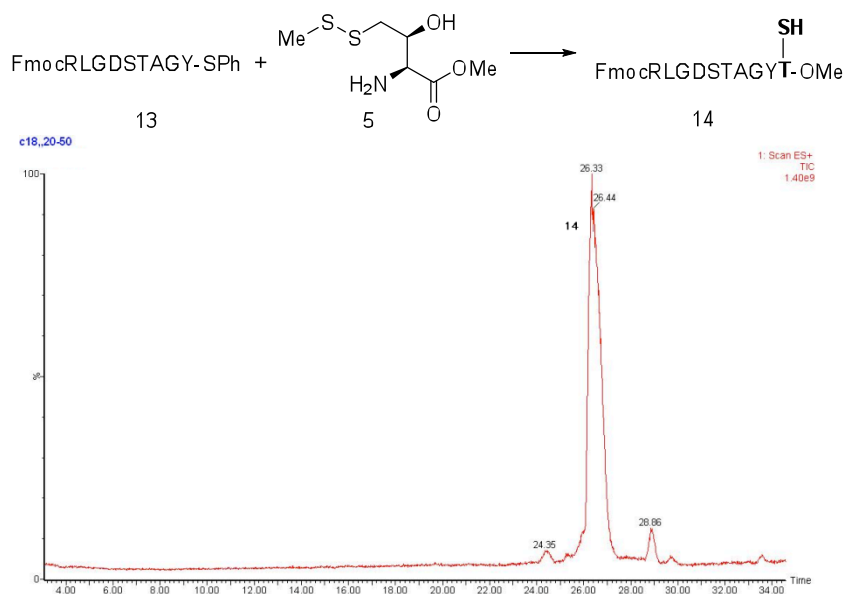

**Figure 43.** LC-MS trace of ligation between **13** and **5** at 30 min: gradient 20-50% CH<sub>3</sub>CN/H<sub>2</sub>O over 30 min at a flow rate of 0.2 mL/min, C18 column.

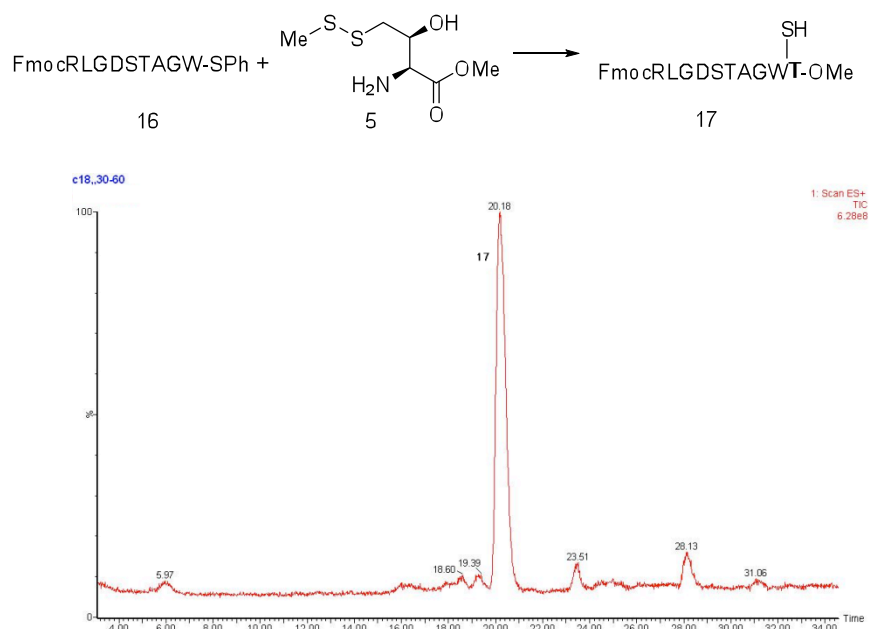

**Figure 44.** LC-MS trace of ligation between **16** and **5** at 30 min: gradient 30-60% CH<sub>3</sub>CN/H<sub>2</sub>O over 30 min at a flow rate of 0.2 mL/min, C18 column.

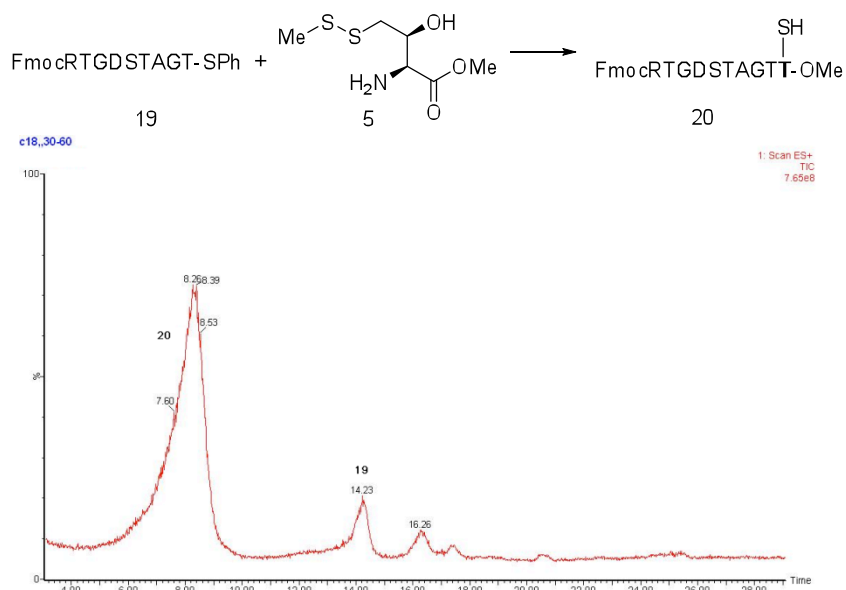

**Figure 45.** LC-MS trace of ligation between **19** and **5** at 30 min: gradient 30-60% CH<sub>3</sub>CN/H<sub>2</sub>O over 30 min at a flow rate of 0.2 mL/min, C18 column.

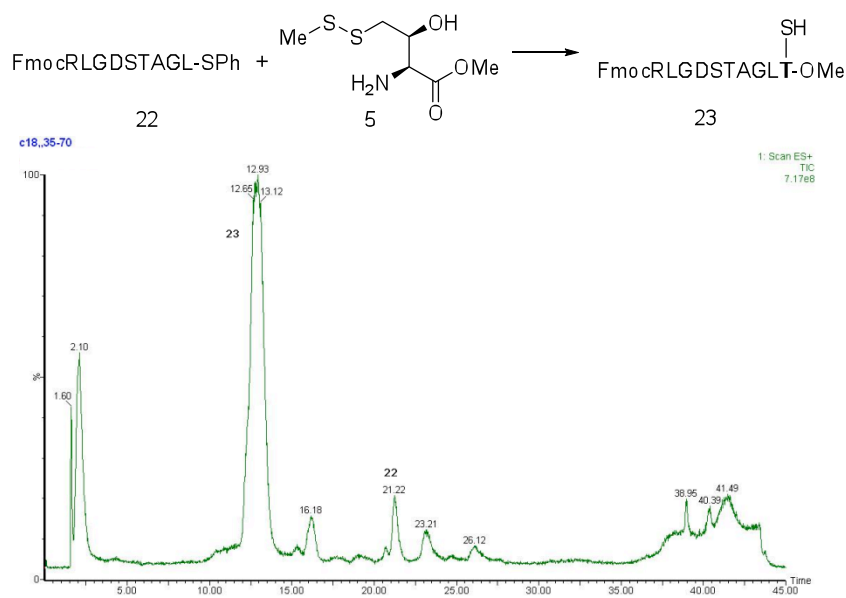

**Figure 46.** LC-MS trace of ligation between **22** and **5** at 30 min: gradient 35-70% CH<sub>3</sub>CN/H<sub>2</sub>O over 30 min at a flow rate of 0.2 mL/min, C18 column.



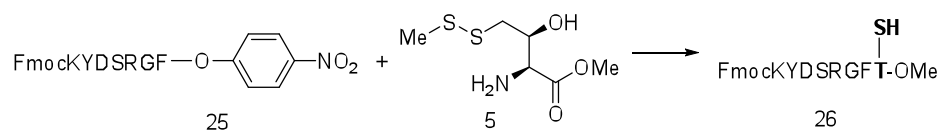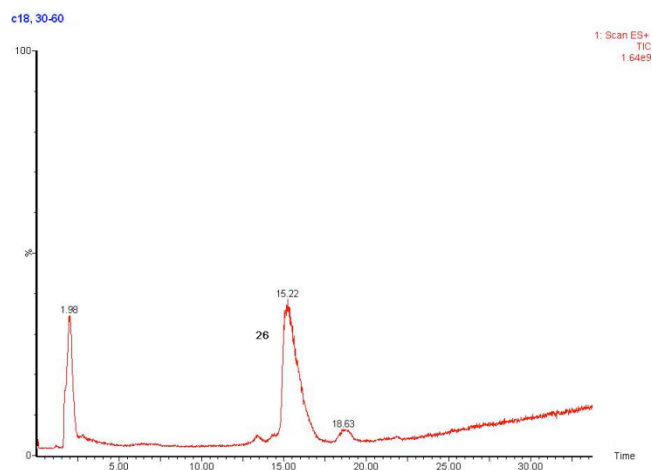

**Figure 47.** LC-MS trace of ligation between **25** and **5** at 30 min: gradient 30-60% CH<sub>3</sub>CN/H<sub>2</sub>O over 30 min at a flow rate of 0.2 mL/min, C18 column.

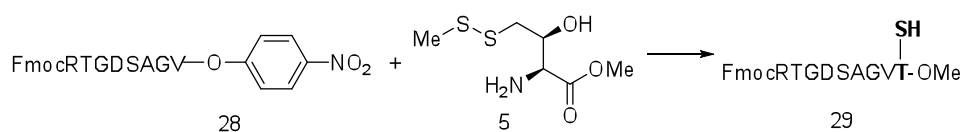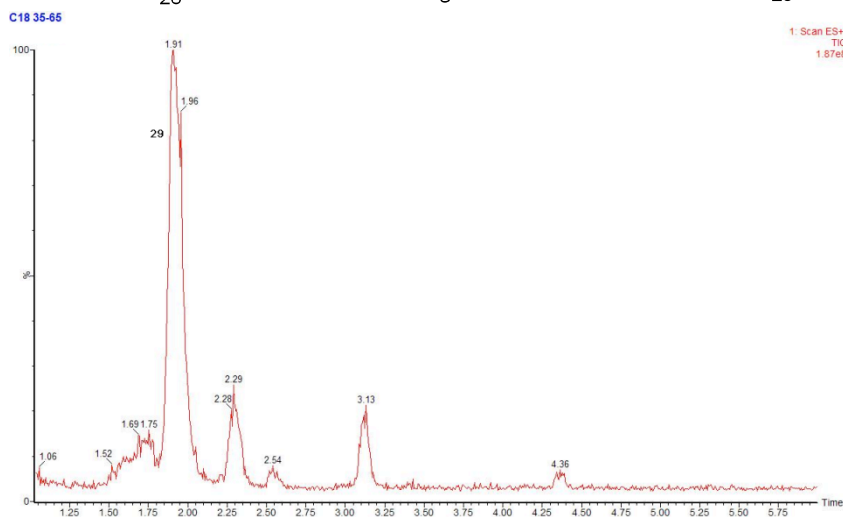

**Figure 48.** LC-MS trace of ligation between **28** and **5** at 3 h: gradient 35-65% CH<sub>3</sub>CN/H<sub>2</sub>O over 30 min at a flow rate of 0.2 mL/min, C18 column.

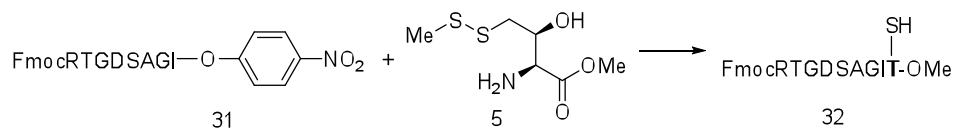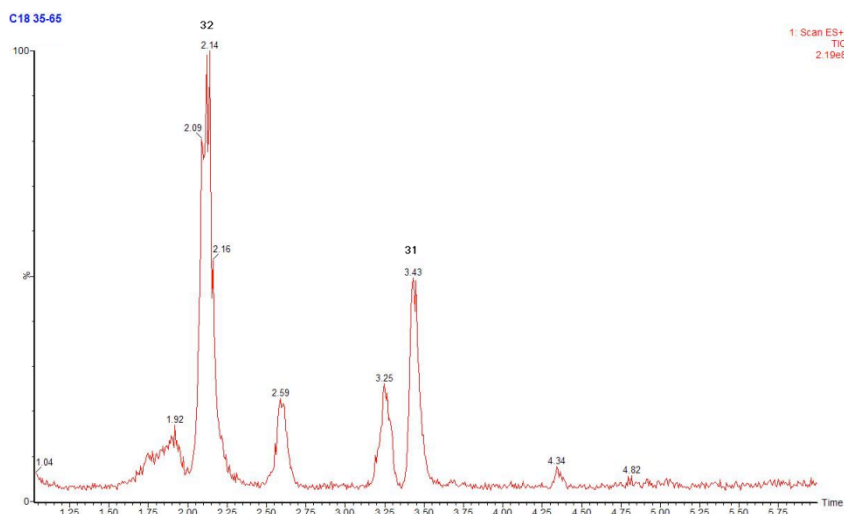

**Figure 49.** LC-MS trace of ligation between **31** and **5** at 4 h: gradient 35-65% CH<sub>3</sub>CN/H<sub>2</sub>O over 30 min at a flow rate of 0.2 mL/min, C18 column.

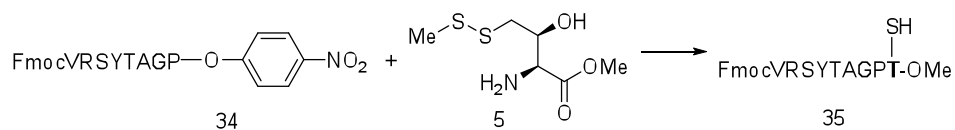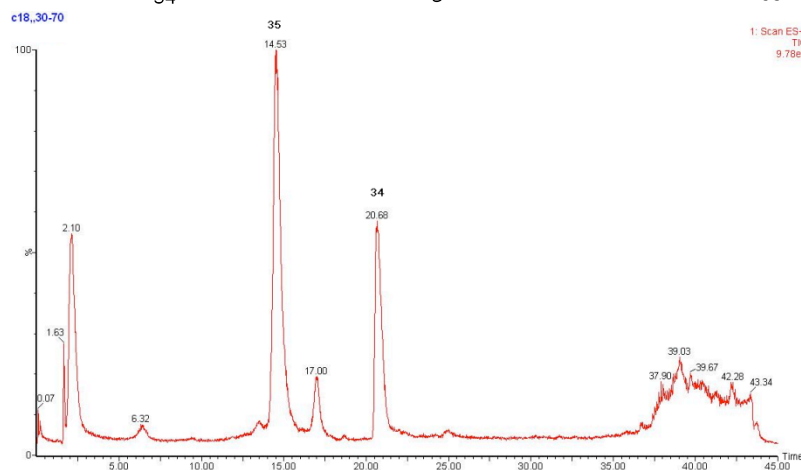

**Figure 50.** LC-MS trace of ligation between **34** and **5** at 1 h: gradient 30-70% CH<sub>3</sub>CN/H<sub>2</sub>O over 30 min at a flow rate of 0.2 mL/min, C18 column.

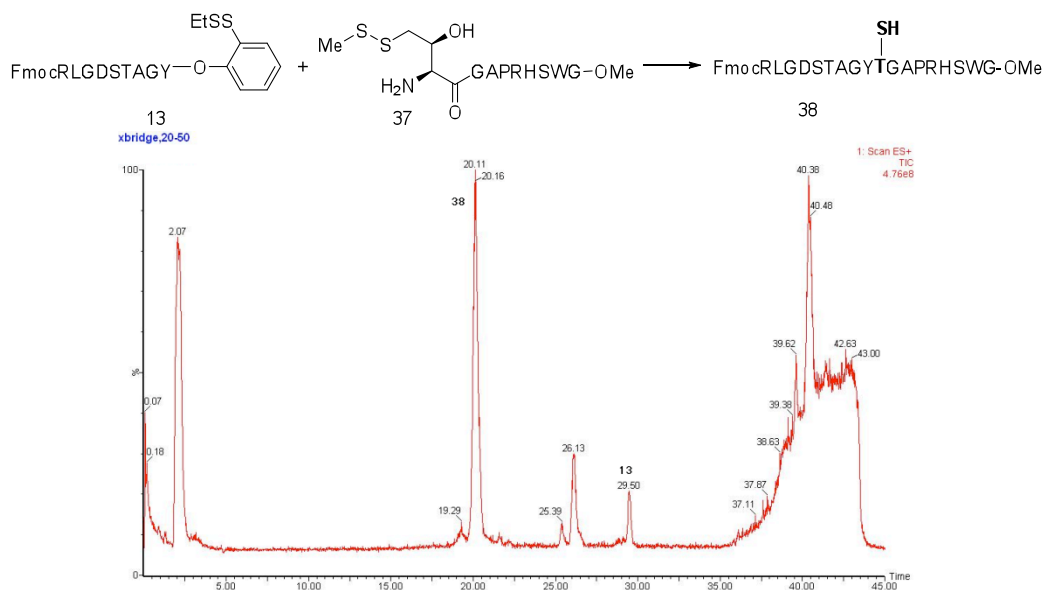

**Figure 51.** LC-MS trace of ligation between **13** and **37** at 1.5 h: gradient 20-50% CH<sub>3</sub>CN/H<sub>2</sub>O over 30 min at a flow rate of 0.2 mL/min, xbridge column.

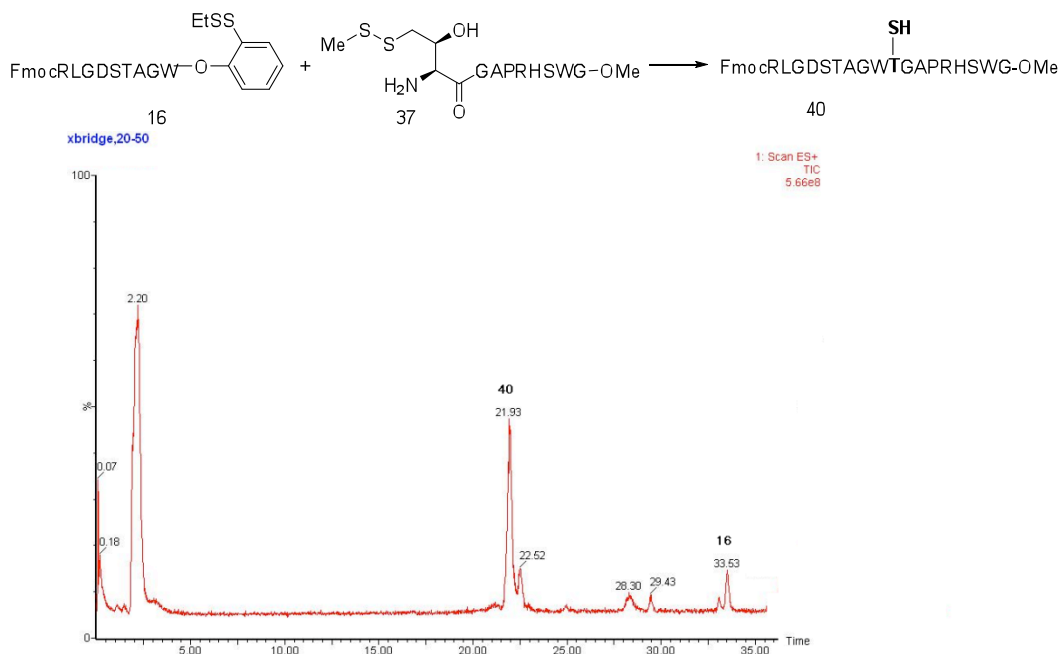

**Figure 52.** LC-MS trace of ligation between **16** and **37** at 1.5 h: gradient 20-50% CH<sub>3</sub>CN/H<sub>2</sub>O over 30 min at a flow rate of 0.2 mL/min, xbridge column.

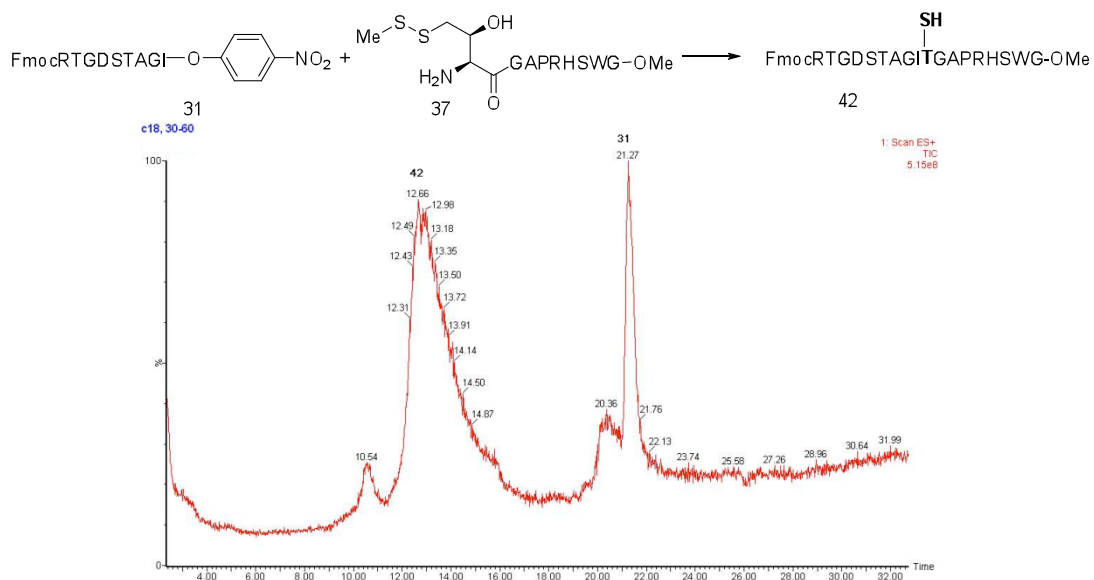

**Figure 53.** LC-MS trace of ligation between **31** and **37** at 3 h: gradient 30-60% CH<sub>3</sub>CN/H<sub>2</sub>O over 30 min at a flow rate of 0.2 mL/min, C18 column.

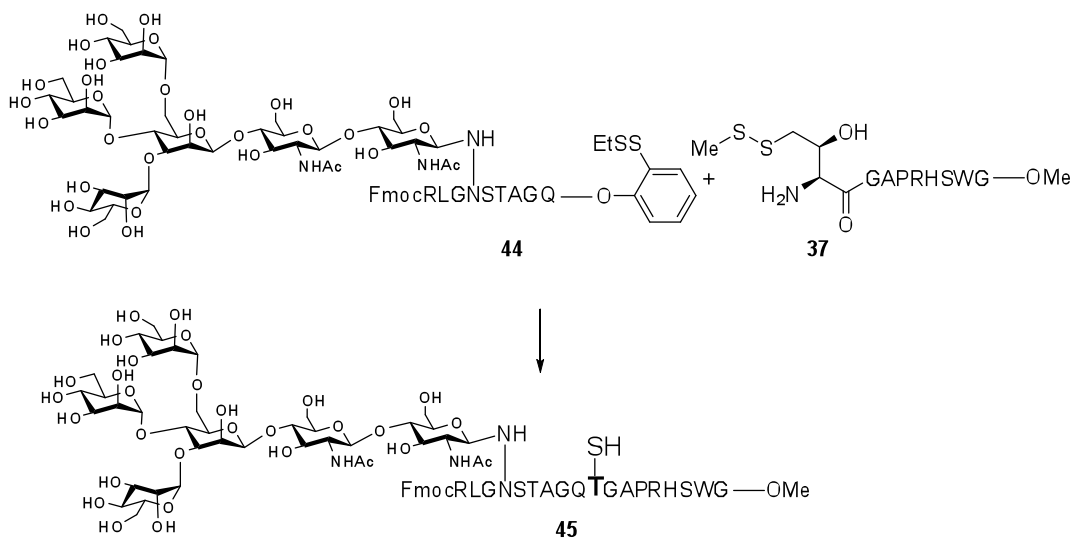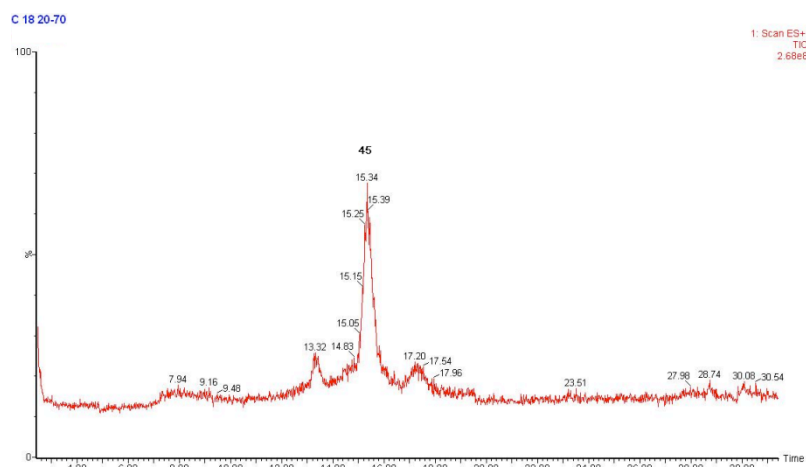

**Figure 54.** LC-MS trace of ligation between **44** and **37** at 2 h: gradient 20-70% CH<sub>3</sub>CN/H<sub>2</sub>O over 30 min at a flow rate of 0.2 mL/min, C18 column.

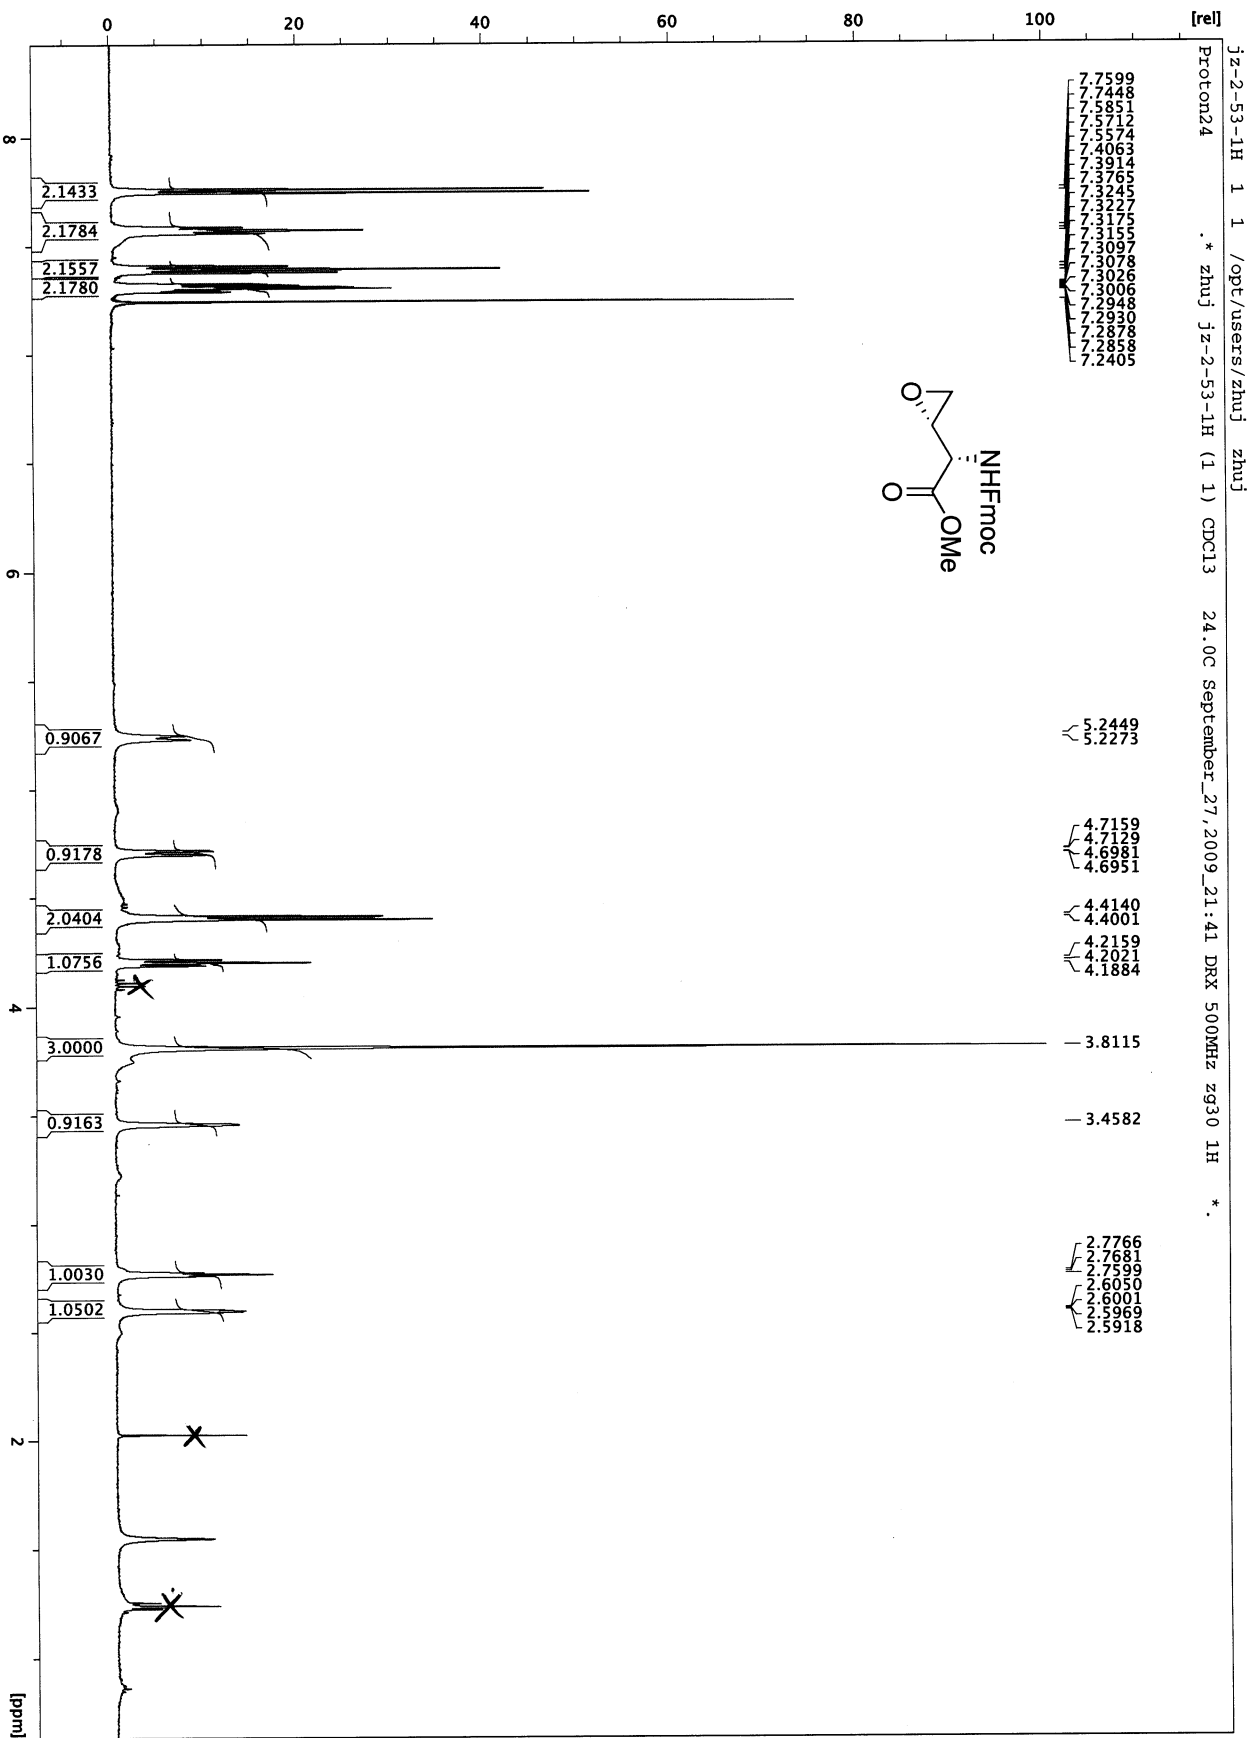

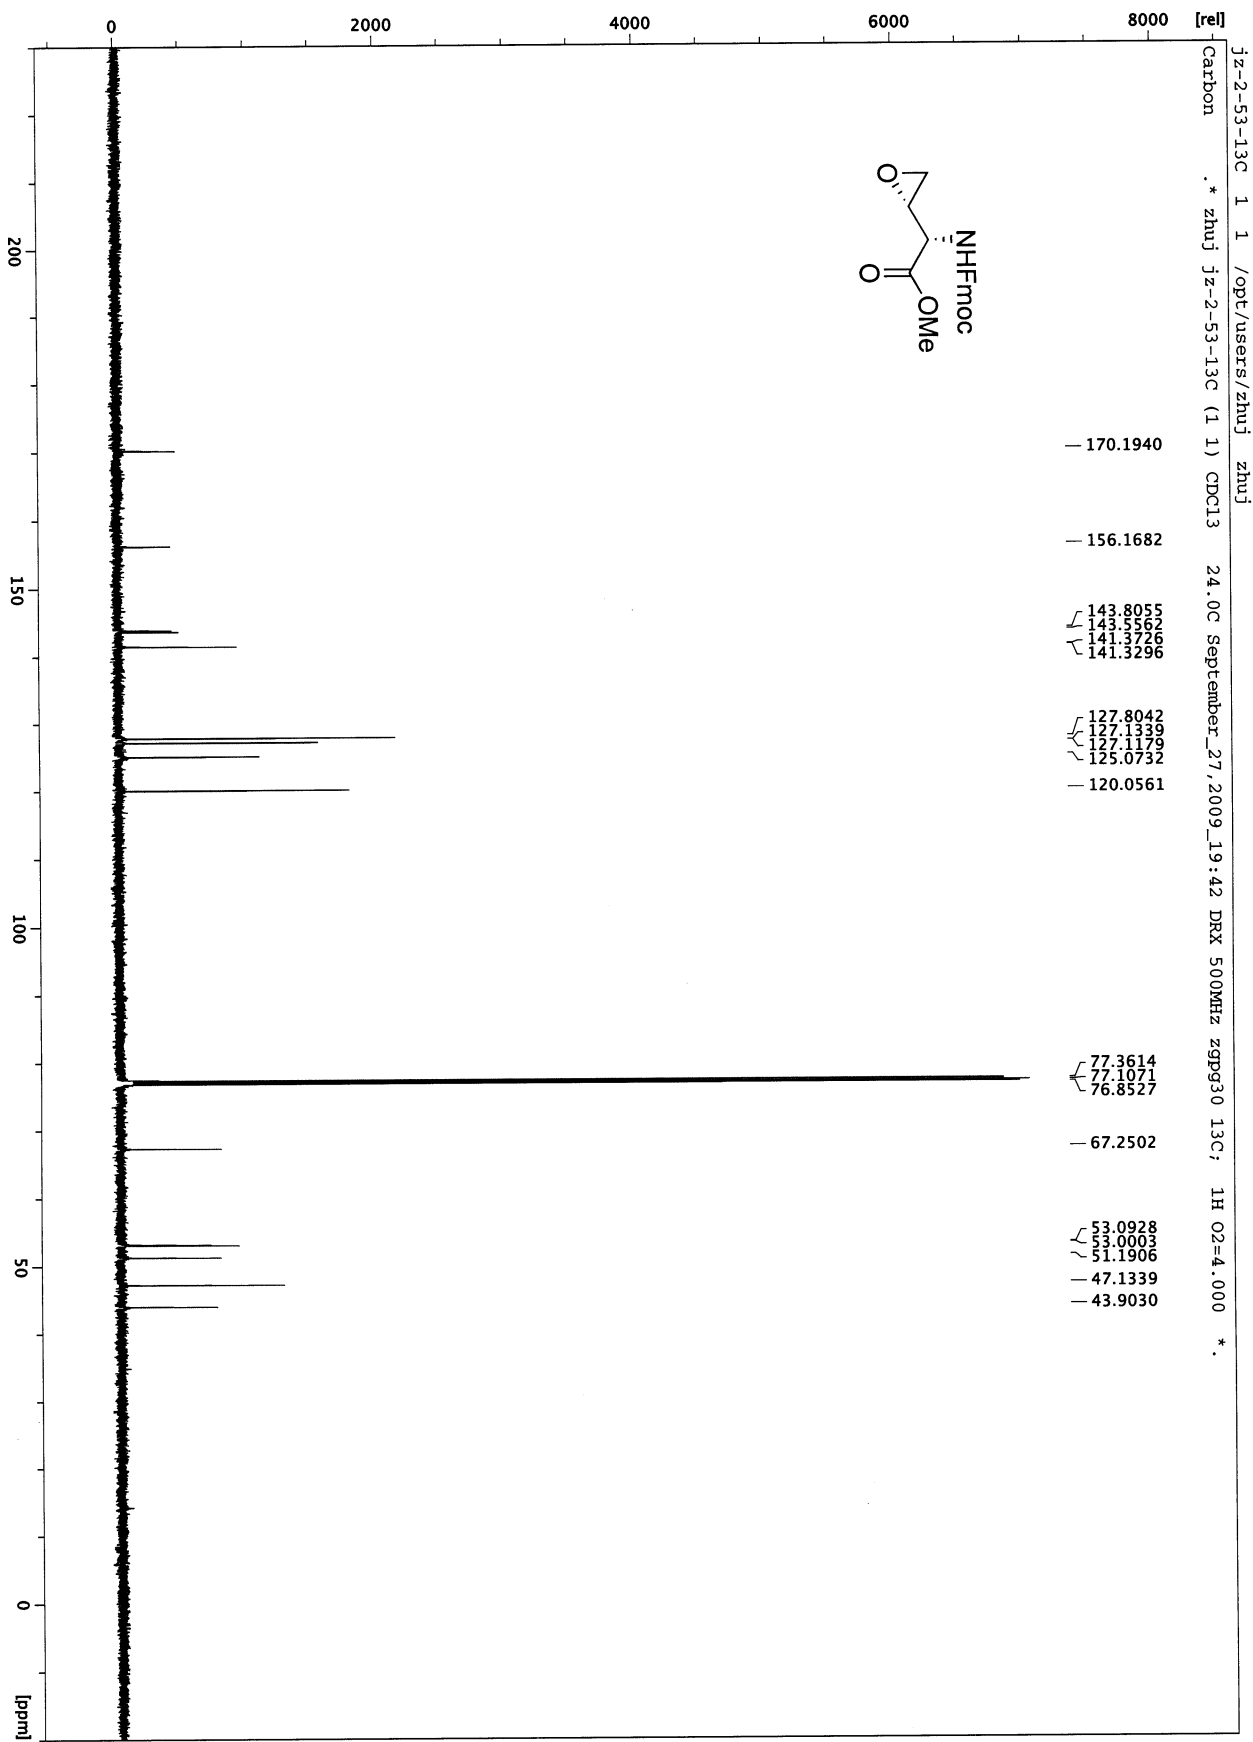

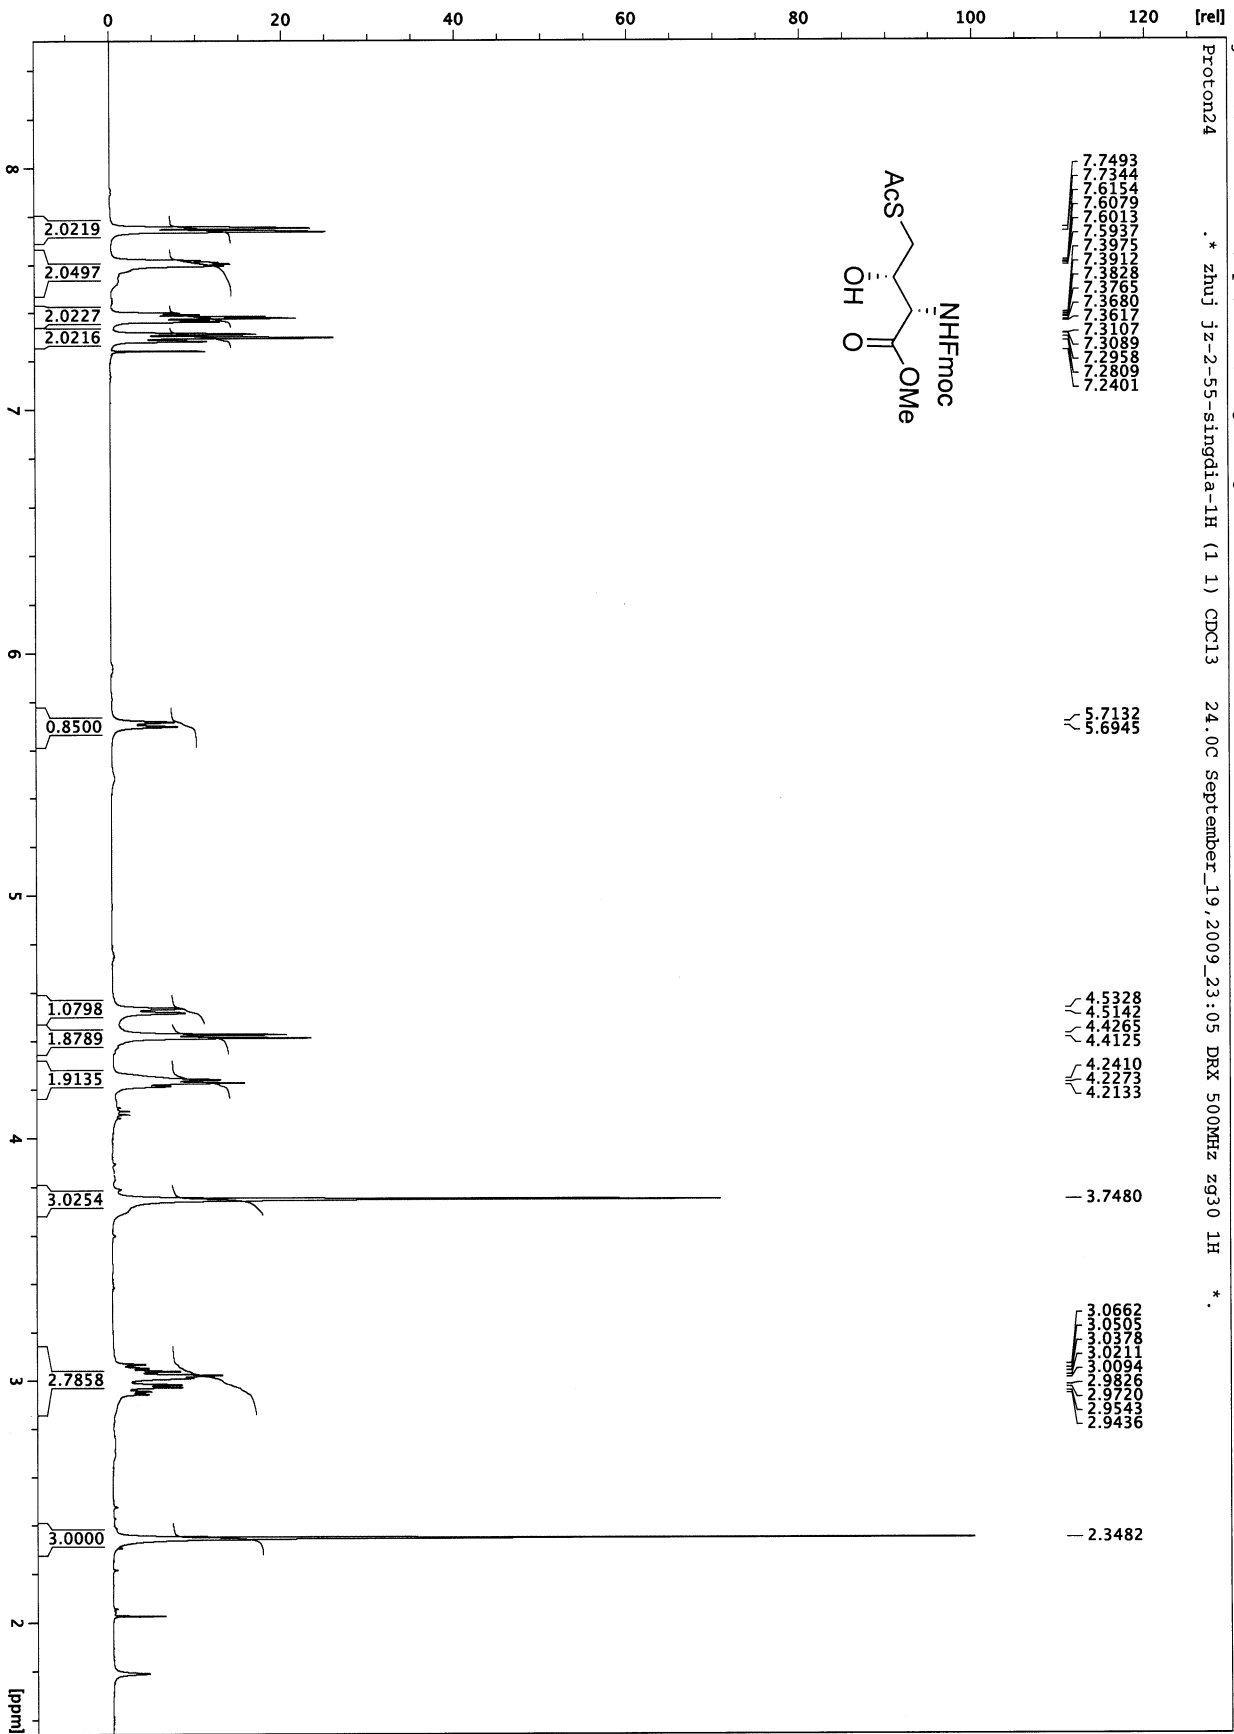



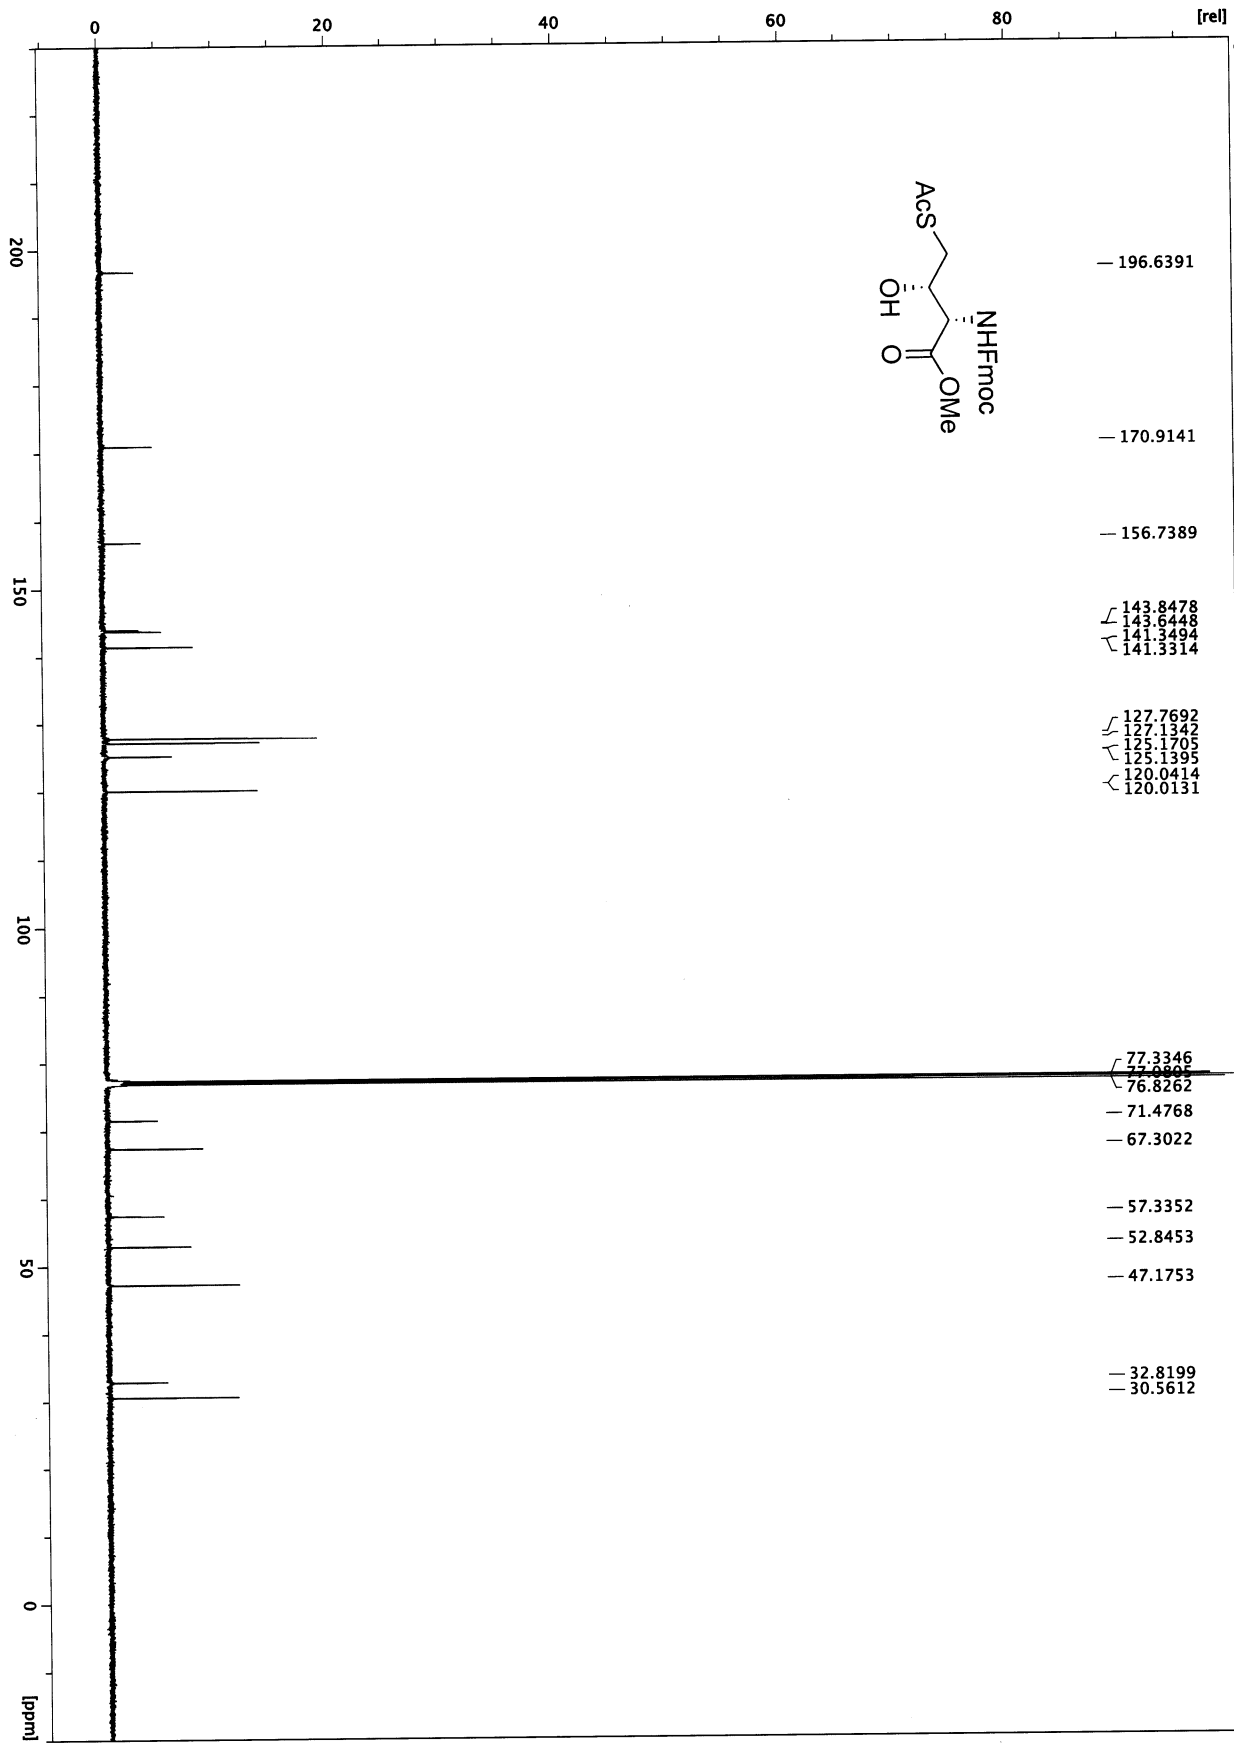

jz-2-55-13C 1 1 /opt/users/zhuji zhuji

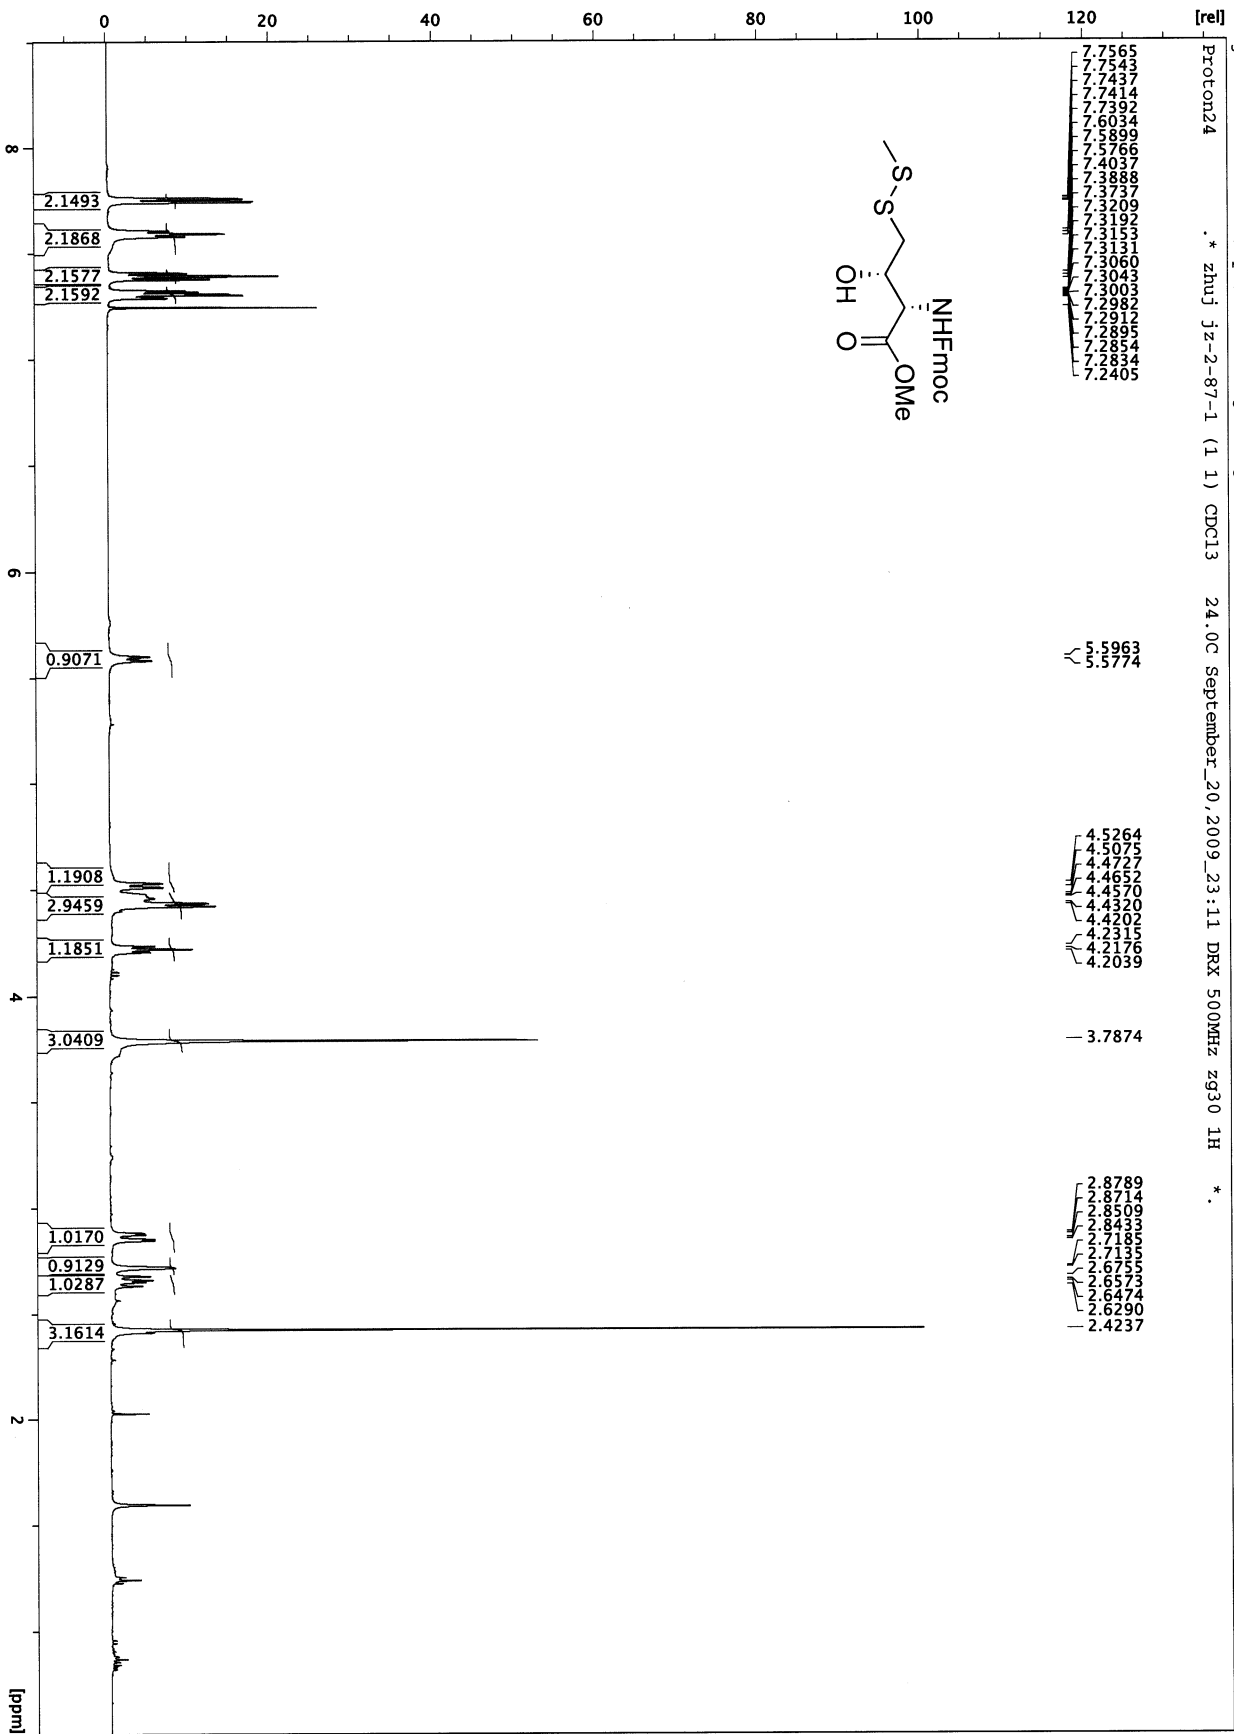

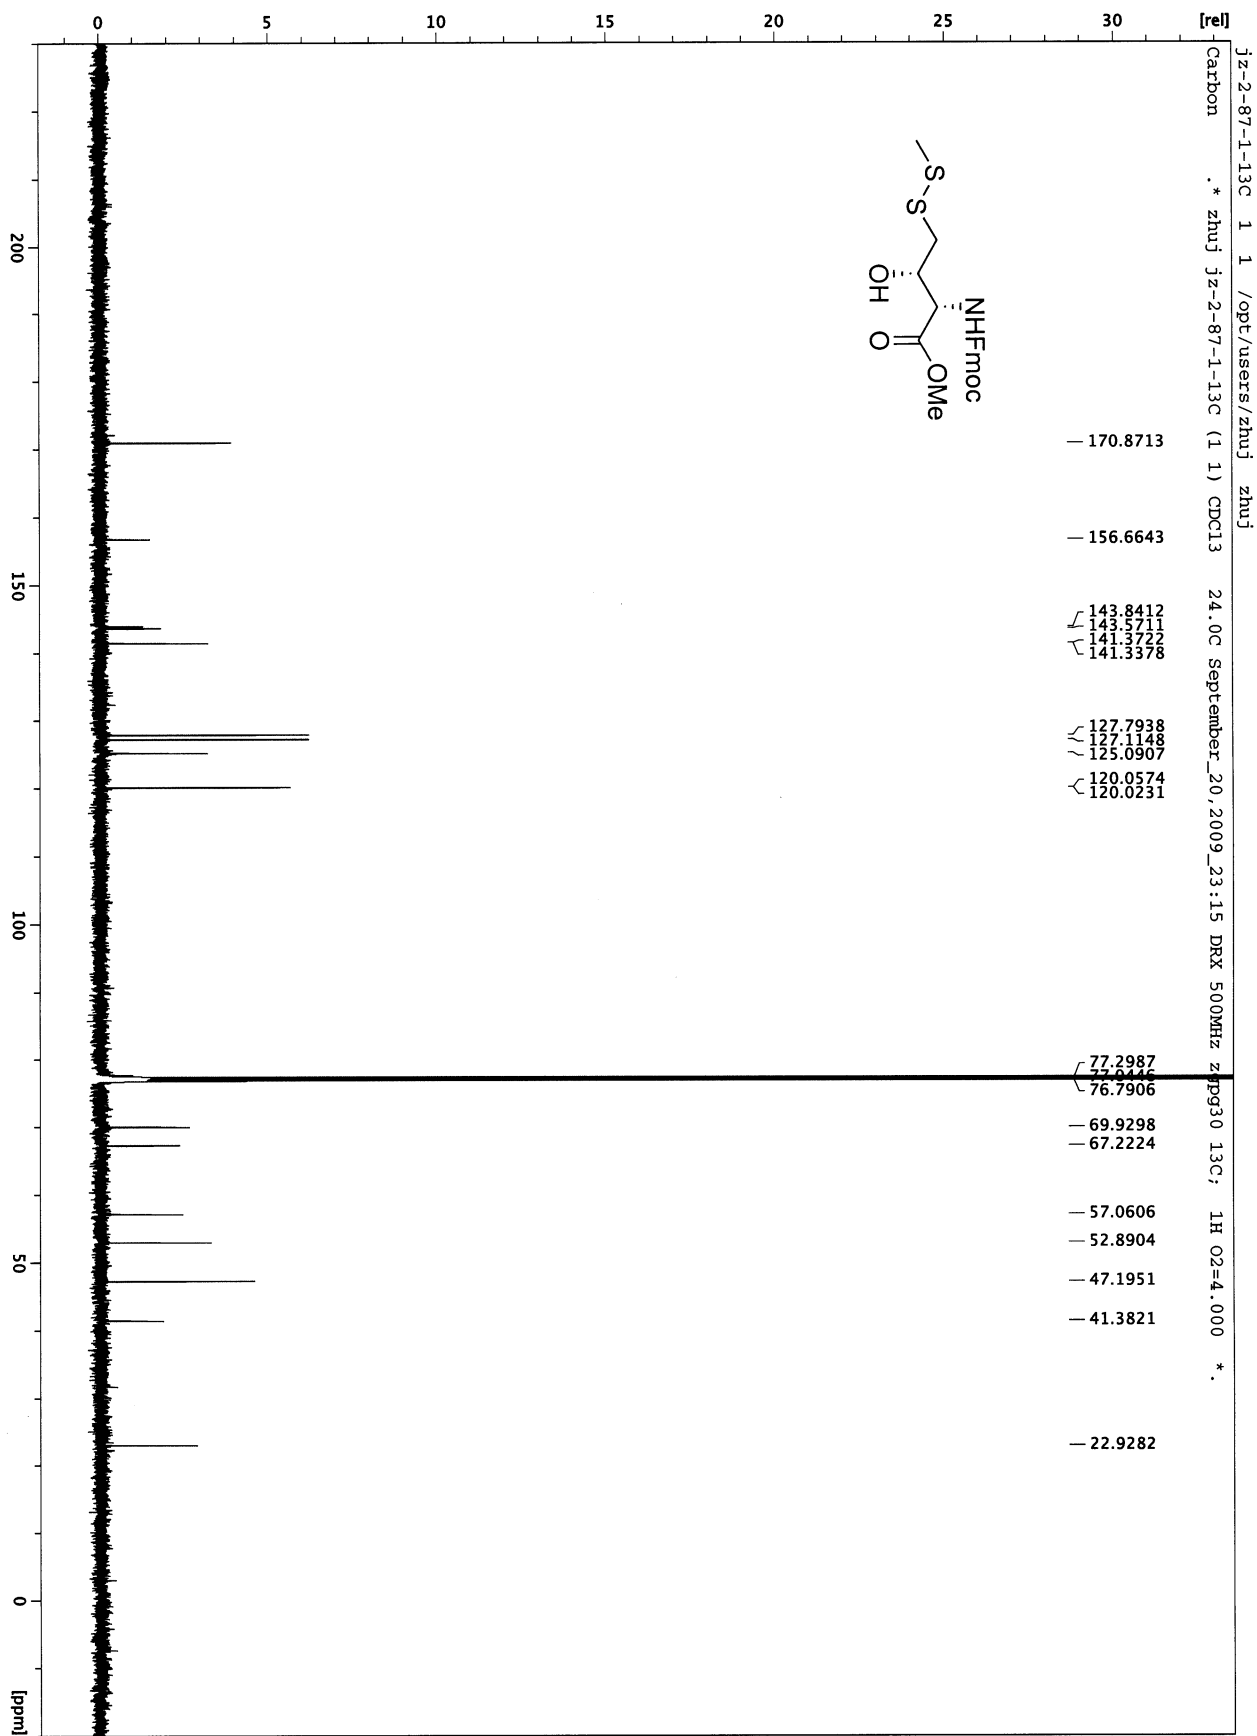

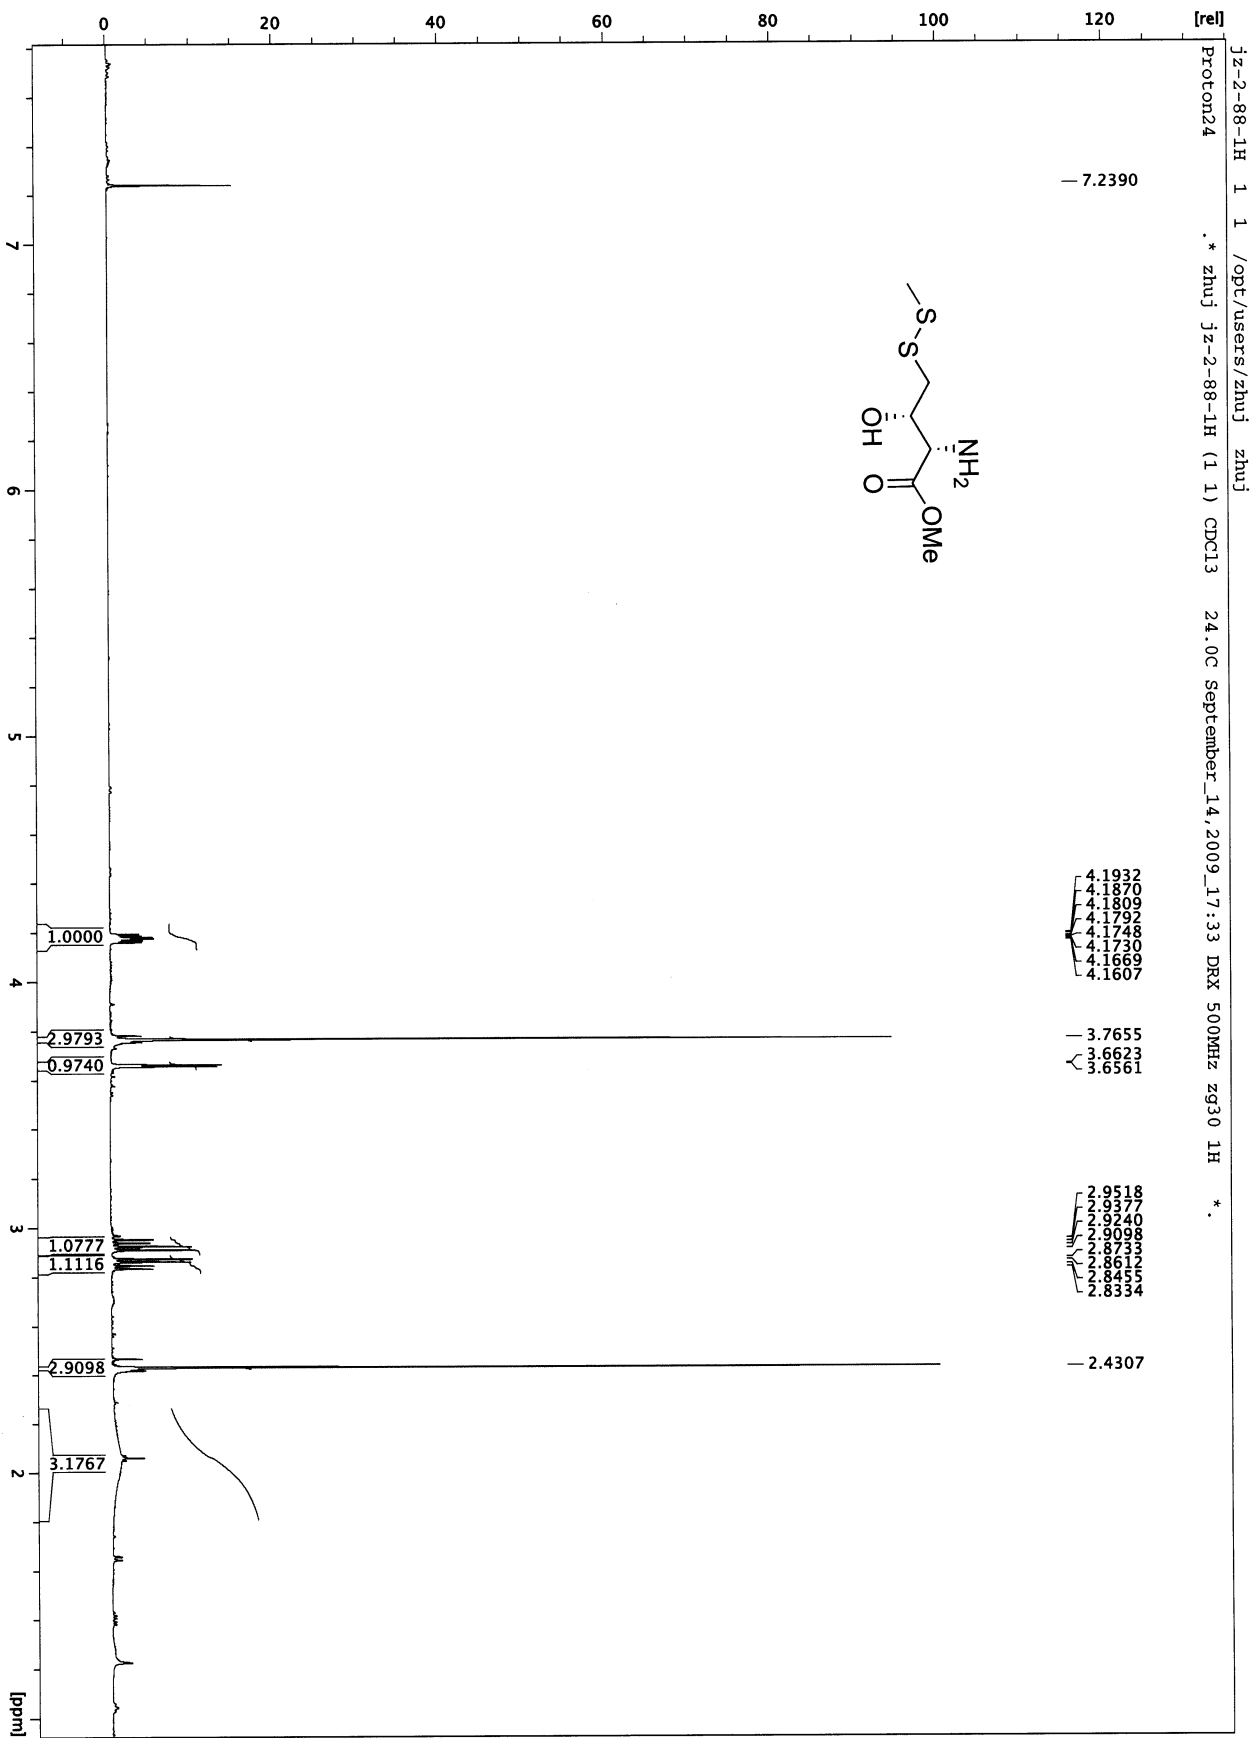

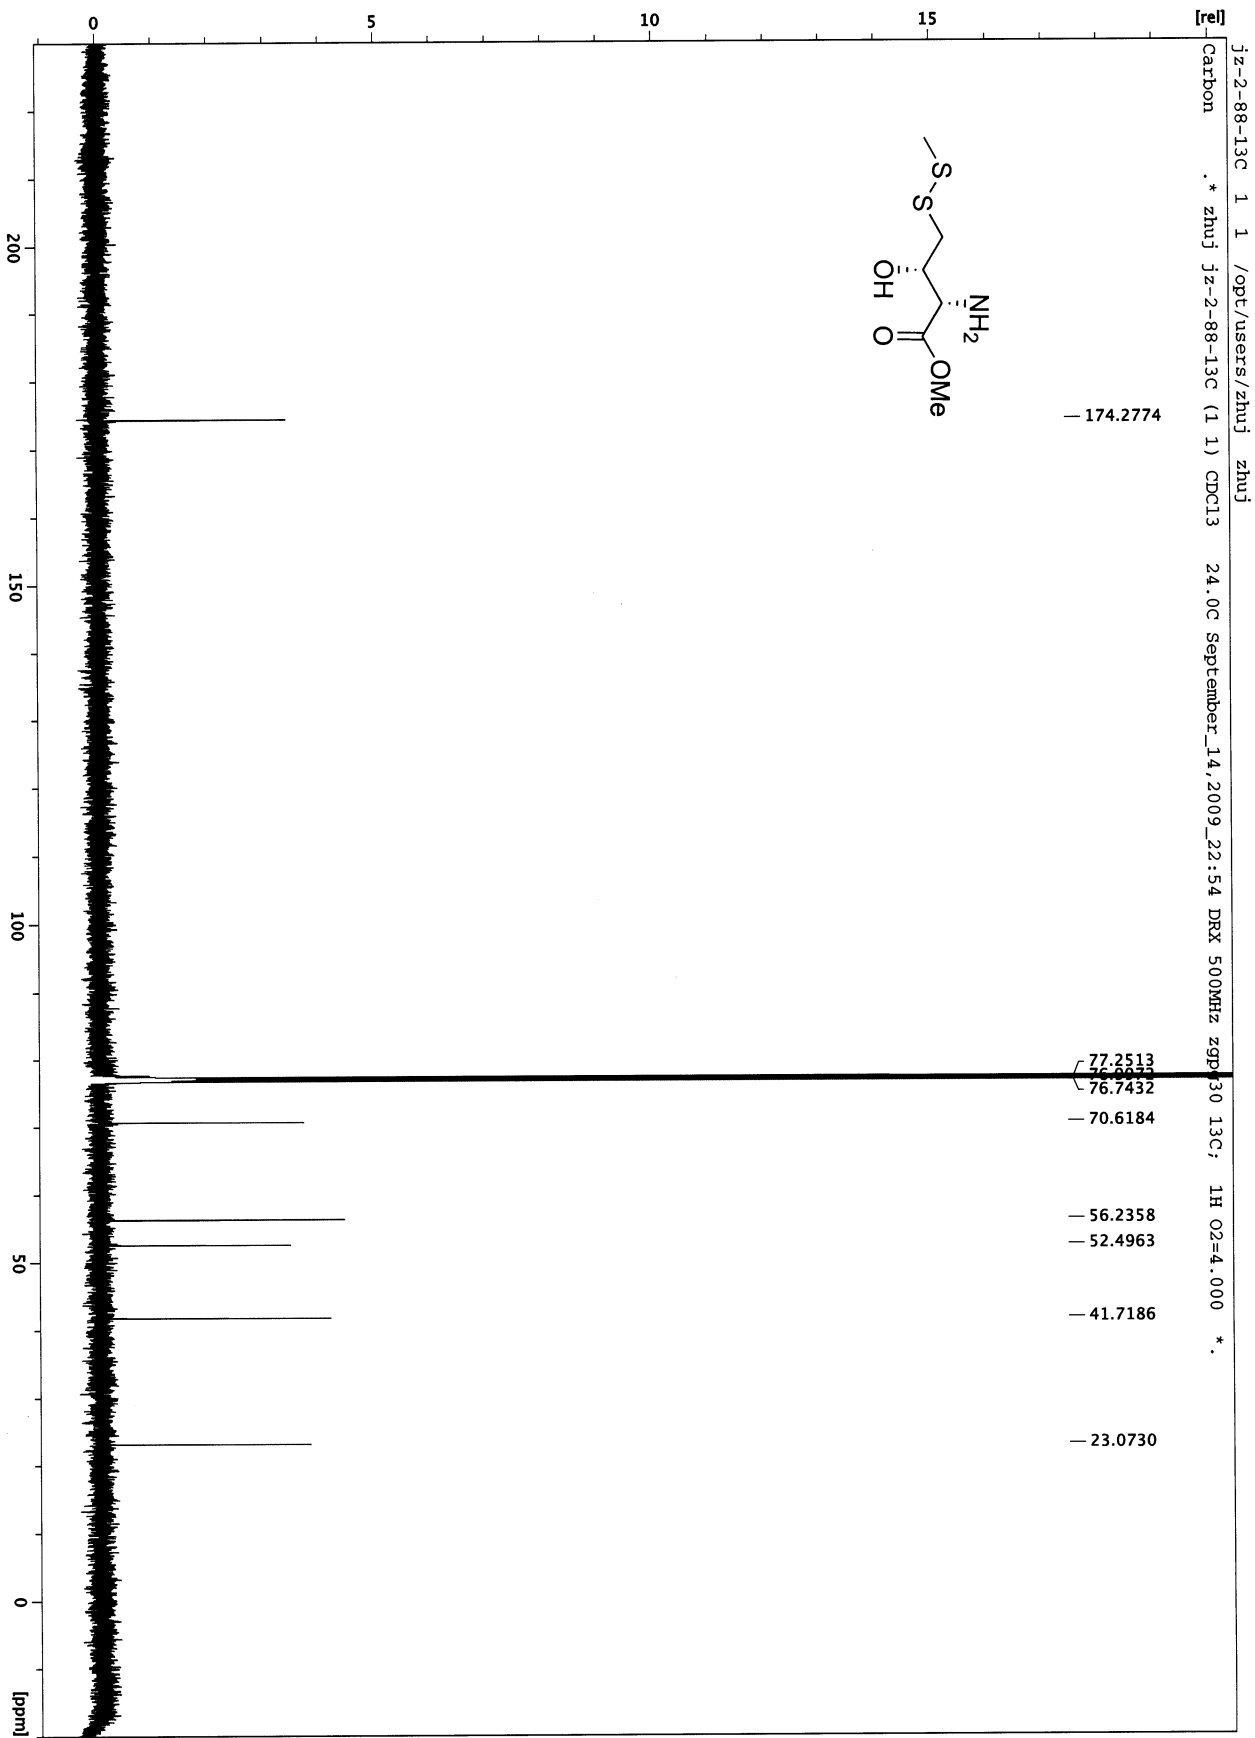

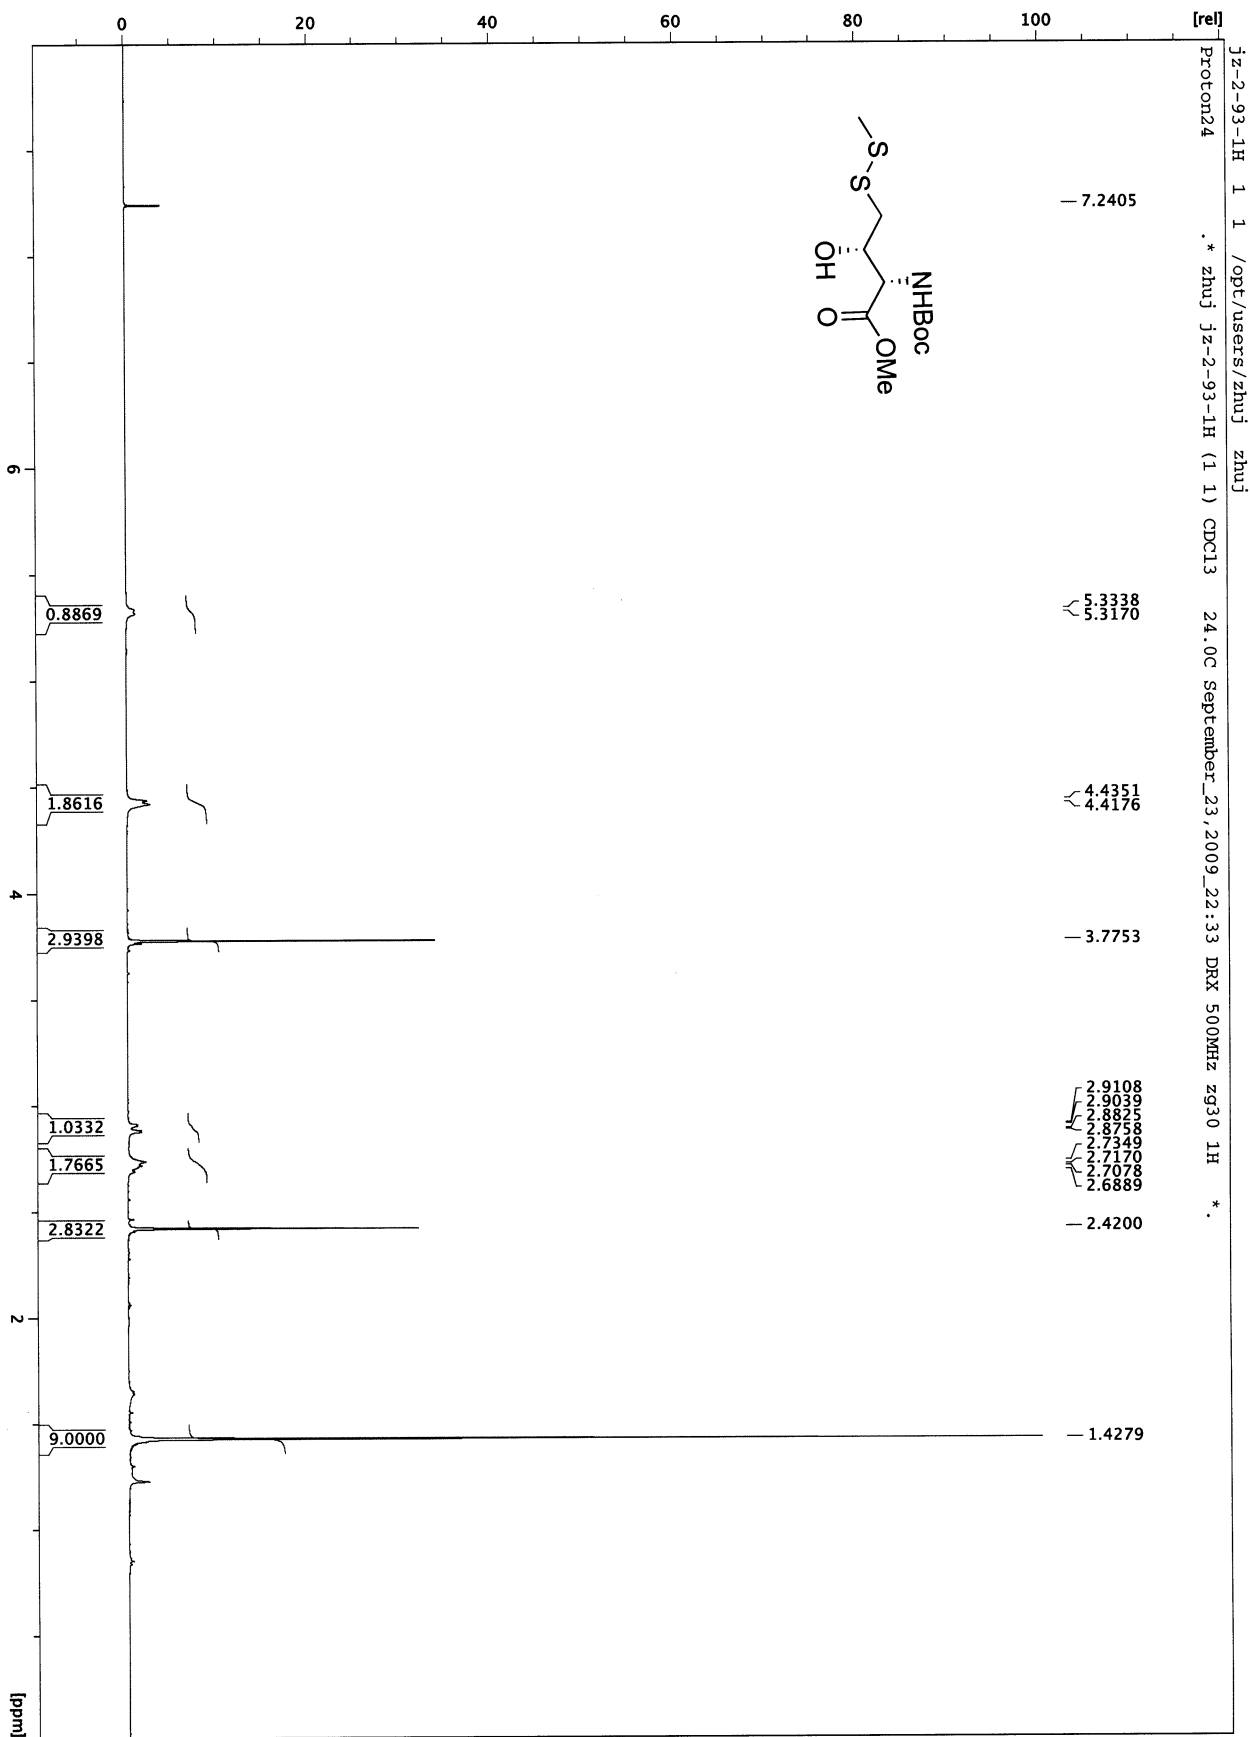

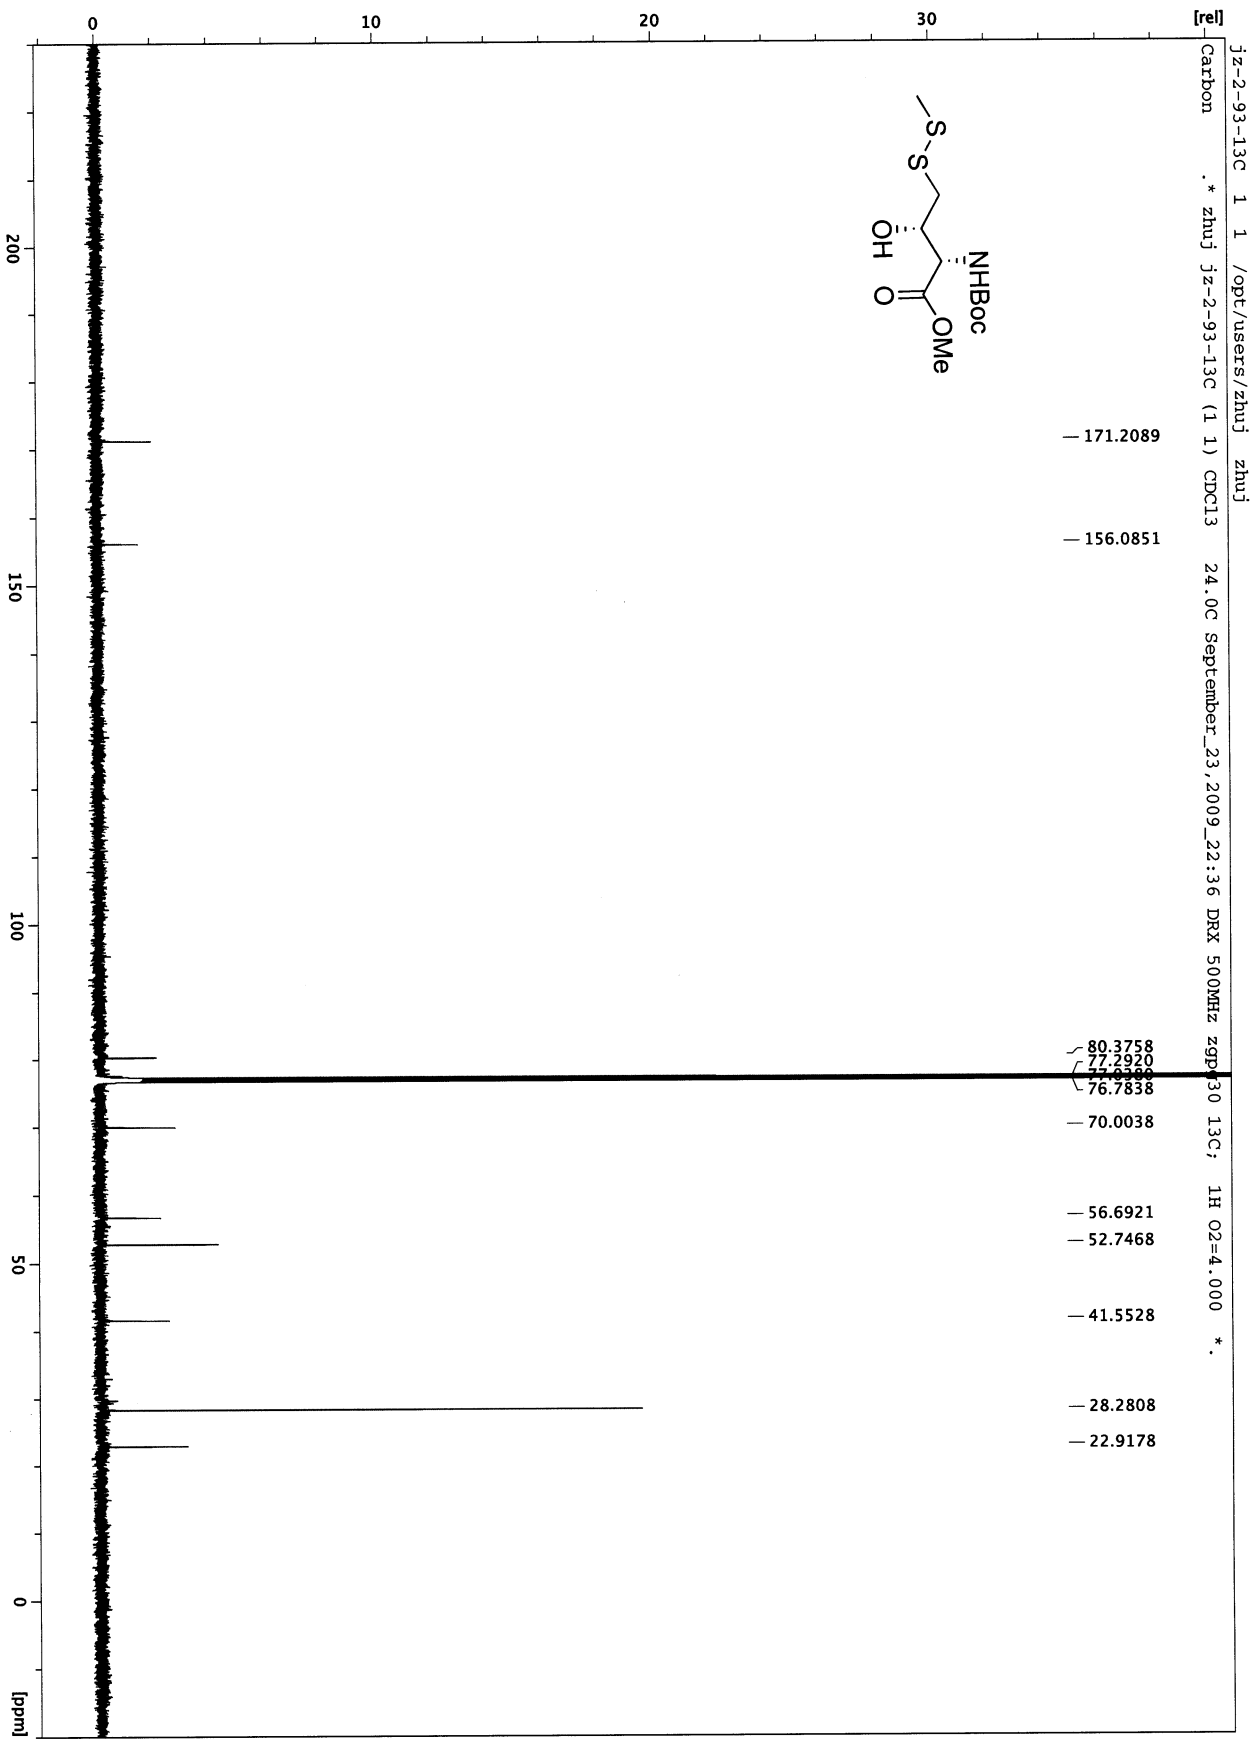

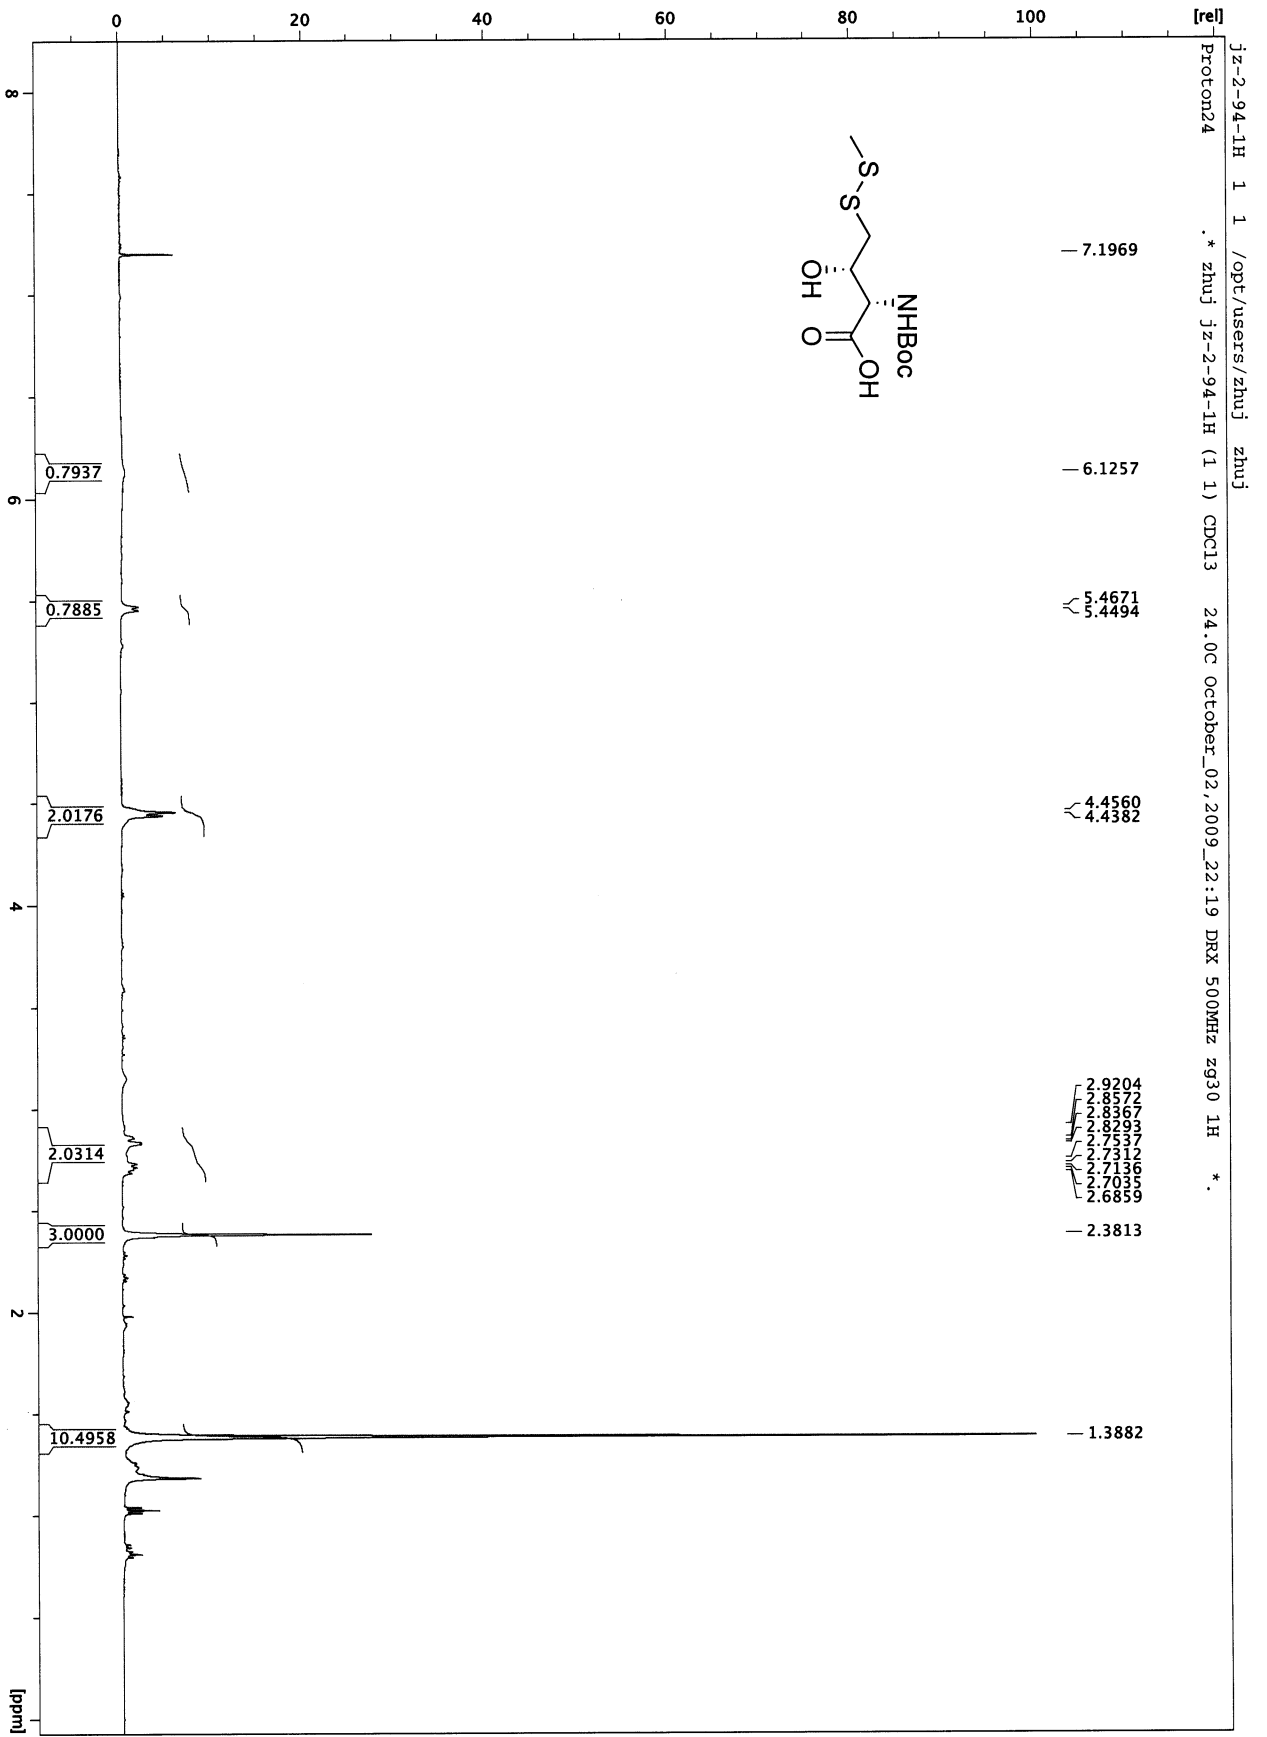



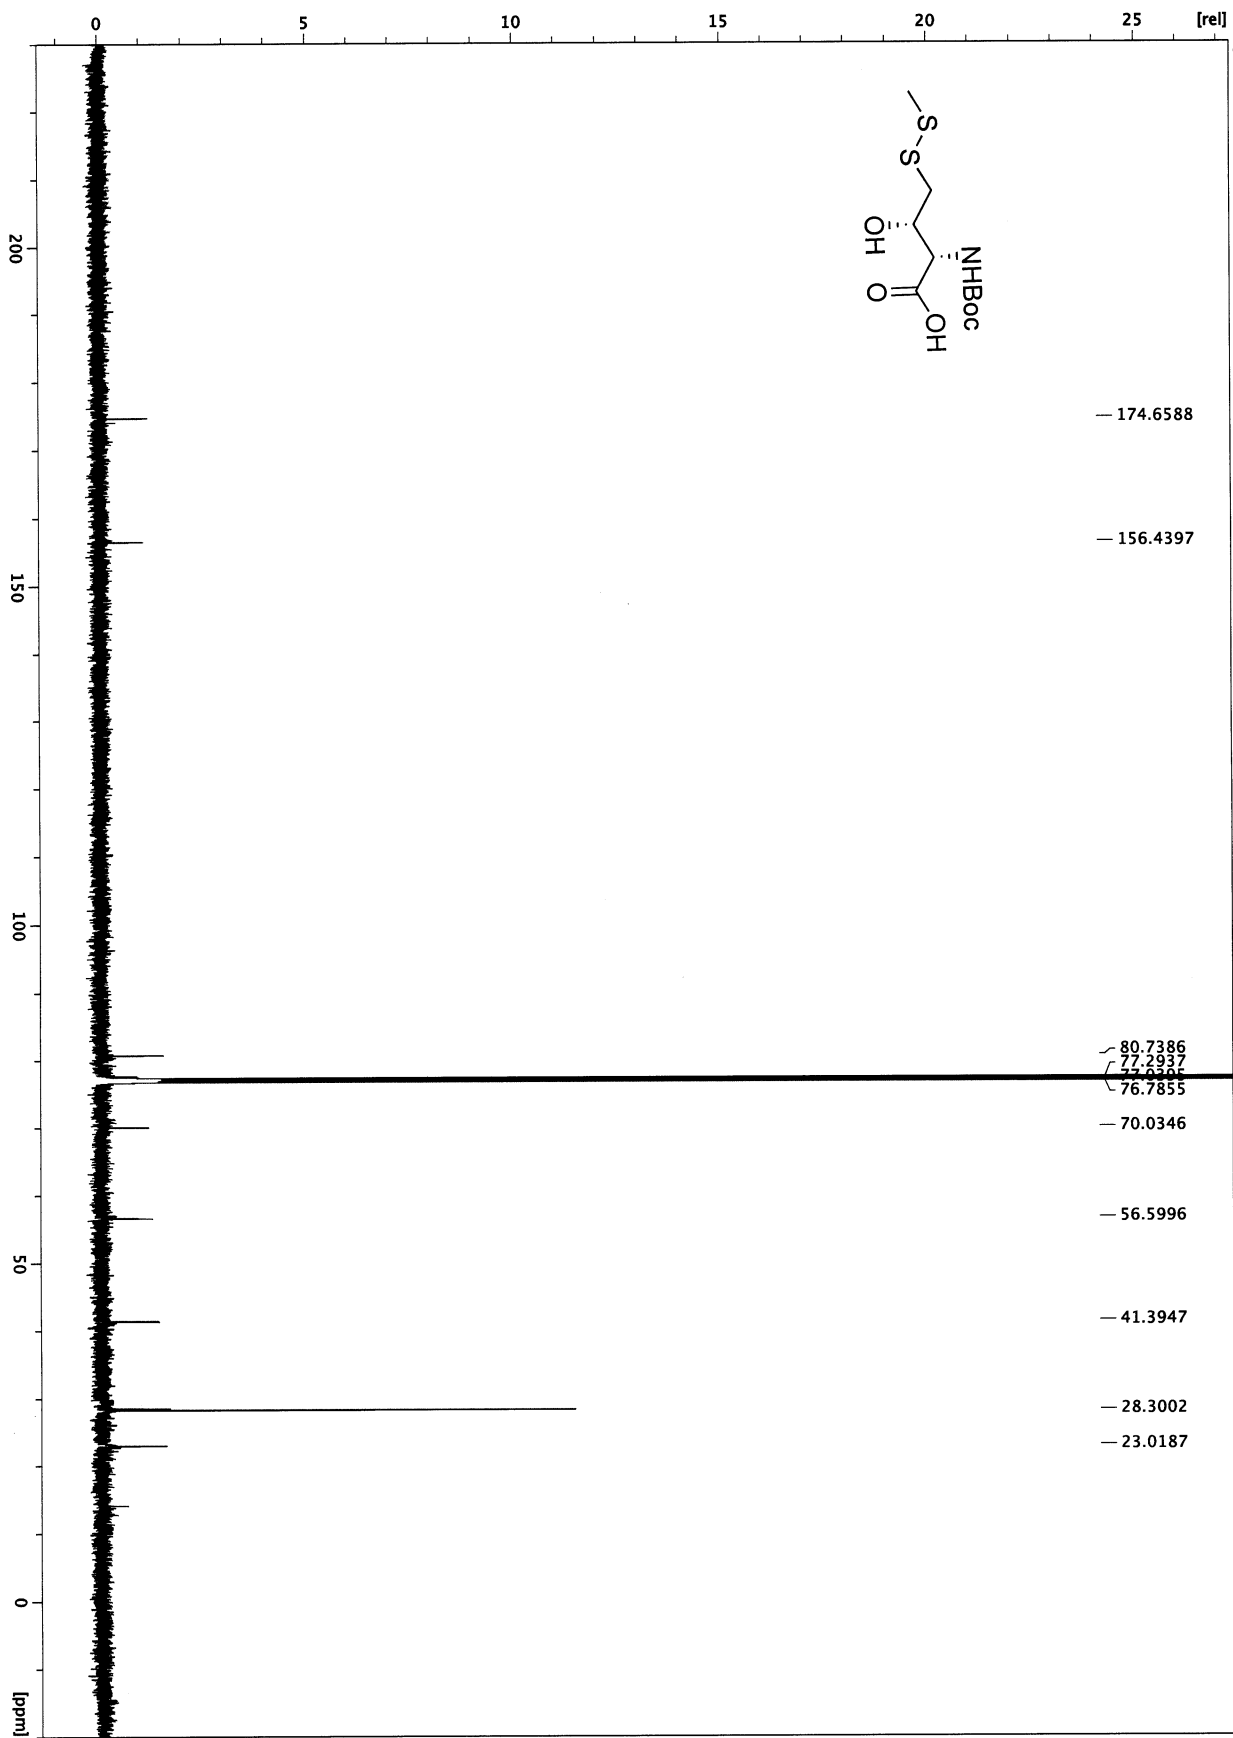

Supplement: NIHMS180739-supplement-01.pdf [file NIHMS180739-supplement-01.pdf]
